# Supplementary material for: Nutritional support for children during critical illness: European Society of Pediatric and Neonatal Intensive Care (ESPNIC) metabolism, endocrine and nutrition section position statement and clinical recommendations
Source: Springer Nature journal article supplement (doi:10.1007/s00134-019-05922-5), 2020-02-20
Supplement: MOESM1 [file 17728412]

| **Supplementary File 2: Search Strategy** | |
| --- | --- |
| **Question** |  |
| Question 1.  In critically ill children, should nutritional status be assessed and what is the optimal method to assess nutritional status? | ***Embase.com (Embase incl. Medline):***  **(**'enteric feeding'/**mj/**de OR 'parenteral nutrition'/**mj/**exp OR 'nutritional support'/**mj**/de OR (((enteric* OR enteral* OR tube* OR gastric* OR parenteral* OR support*) NEAR/3 (nutrition* OR feeding*))):ab,ti**) AND (**'child'/exp OR 'adolescent'/exp OR 'pediatrics'/exp OR 'pediatric hospital'/de OR 'pediatric intensive care unit'/de OR 'newborn intensive care'/de OR (child* OR infant* OR newborn* OR pediatr* OR paediatr* OR PICU*):ab,ti**) AND (**'pediatric intensive care unit'/de OR 'newborn intensive care'/de OR 'intensive care'/de OR 'intensive care unit'/de OR 'high risk population'/de OR 'critically ill patient'/de OR 'intensive care nursing'/exp OR (((intensive OR critical*) NEAR/3 (care OR ill*)) OR ICU OR PICU* OR 'high risk'):ab,ti**) AND (**'nutritional assessment'/de OR 'nutritional status'/exp OR (((nutrition* OR diet* OR malnutrition*) NEAR/3 (assess* OR state OR status OR evaluat* OR normal OR good OR index OR indices)) OR eutrophia*):ab,ti**) NOT (**[animals]/lim NOT [humans]/lim**) NOT (**'Conference Abstract' OR *'Editorial'****)/it AND [****1997-2018]/py*  ***Medline Epub (Ovid):***  **(**exp *"Nutritional Support"/ OR (((enteric* OR enteral* OR tube* OR gastric* OR parenteral* OR support*) ADJ3 (nutrition* OR feeding*))).ab,ti.**) AND (**exp "Child"/ OR "Infant"/ OR "Infant, Newborn"/ OR "Adolescent"/ OR exp "Pediatrics"/ OR "Hospitals, Pediatric"/ OR exp "Intensive Care Units, Pediatric"/ OR "Intensive Care, Neonatal"/ OR (child* OR infant* OR newborn* OR pediatr* OR paediatr* OR PICU*).ab,ti.**) AND (**exp "Intensive Care Units"/ OR exp "Critical Care"/ OR "Critical Illness"/ OR "Critical Care Nursing"/ OR (((intensive OR critical*) ADJ3 (care OR ill*)) OR ICU OR PICU* OR "high risk").ab,ti.**) AND (**"Nutrition Assessment"/ OR "Nutritional Status"/ OR (((nutrition* OR diet* OR malnutrition*) ADJ3 (assess* OR state OR status OR evaluat* OR normal OR good OR index OR indices)) OR eutrophia*).ab,ti.**) NOT (**exp animals/ NOT humans/**) NOT (**"congresses" OR "editorial"**).**pt.  *Limits Publication year: 1997-*2018  ***Cochrane Central (trials):***  **(**(((enteric* OR enteral* OR tube* OR gastric* OR parenteral* OR support*) NEAR/3 (nutrition* OR feeding*))):ab,ti**) AND (**(child* OR infant* OR newborn* OR pediatr* OR paediatr* OR PICU*):ab,ti**) AND (**(((intensive OR critical*) NEAR/3 (care OR ill*)) OR ICU OR PICU* OR 'high risk'):ab,ti**) AND (**(((nutrition* OR diet* OR malnutrition*) NEAR/3 (assess* OR state OR status OR evaluat* OR normal OR good OR index OR indices)) OR eutrophia*):ab,ti**)**  *Selection 1997-2018*  ***Web of Science:***  **TS=((**(((enteric* OR enteral* OR tube* OR gastric* OR parenteral* OR support*) NEAR/2 (nutrition* OR feeding*)))**) AND (**(child* OR infant* OR newborn* OR pediatr* OR paediatr* OR PICU*)**) AND (**(((intensive OR critical*) NEAR/2 (care OR ill*)) OR ICU OR PICU* OR "high risk")**) AND (**(((nutrition* OR diet* OR malnutrition*) NEAR/2 (assess* OR state OR status OR evaluat* OR normal OR good OR index OR indices)) OR eutrophia*)**) NOT** ((animal* OR rat OR rats OR pig* OR swine*) NOT (human* OR patient*))) **AND DT=**Article  *From: 1997-2018* |
| Question 2.  In critically ill children, when should enteral nutrition be commenced and how should it be increased? | ***Embase.com (Embase incl. Medline)***  **(**'enteric feeding'/**mj/**de OR 'parenteral nutrition'/**mj/**exp *OR 'nutritional support'/****mj****/de* OR (((enteric* OR enteral* OR tube* OR gastric* OR parenteral* OR support*) NEAR/3 (nutrition* OR feeding*))):ab,ti**) AND (**'child'/exp OR 'adolescent'/exp OR 'pediatrics'/exp OR 'pediatric hospital'/de OR 'pediatric intensive care unit'/de OR 'newborn intensive care'/de OR (child* OR infant* OR newborn* OR pediatr* OR paediatr* OR PICU*):ab,ti**) AND *(****'pediatric intensive care unit'/de OR 'newborn intensive care'/de OR 'intensive care'/de* *OR 'intensive care unit'/de OR 'high risk population'/de OR 'critically ill patient'/de OR 'intensive care nursing'/exp* *OR (((intensive OR critical*) NEAR/3 (care OR ill*)) OR ICU OR PICU* OR 'high risk'):ab,ti****)* AND (**'timing'/de OR 'early treatment'/de *OR 'time factor'/de* OR (timing *OR time* OR ((early) NEAR/3 (late OR feeding OR nutrition*)) OR ((late OR full OR delay*) NEAR/3 (feeding OR nutrition*)) OR (trophic NEAR/3 full) OR 'minimal enteral' OR 'rate of increase' *OR ((total* OR supplement* OR partial*) NEAR/3 (PN OR nutrition* OR feed*))*):ab,ti**) NOT (**[animals]/lim NOT [humans]/lim**) NOT (**'Conference Abstract' OR 'Editorial'**)/it AND [**1997-2018]/py  ***Medline Epub (Ovid):***  **(**exp *"Nutritional Support"/OR (((enteric* OR enteral* OR tube* OR gastric* OR parenteral* OR support*) ADJ3 (nutrition* OR feeding*))).ab,ti.**) AND (**exp "Child"/ OR "Infant"/ OR "Infant, Newborn"/ OR "Adolescent"/ OR exp "Pediatrics"/ OR "Hospitals, Pediatric"/ OR exp "Intensive Care Units, Pediatric"/ OR "Intensive Care, Neonatal"/ OR (child* OR infant* OR newborn* OR pediatr* OR paediatr* OR PICU*).ab,ti.**) AND (**exp "Intensive Care Units"/ OR exp "Critical Care"/ OR "Critical Illness"/ *OR "Critical Care Nursing"/* OR (((intensive OR critical*) ADJ3 (care OR ill*)) OR ICU OR PICU* OR "high risk").ab,ti.**) AND (**"Early Medical Intervention"/ *OR "Time Factors"/* OR (timing *OR time* OR ((early) ADJ3 (late OR feeding OR nutrition*)) OR ((late OR full OR delay*) ADJ3 (feeding OR nutrition*)) OR (trophic ADJ3 full) OR "minimal enteral" OR "rate of increase" *OR ((total* OR supplement* OR partial*) ADJ3 (PN OR nutrition* OR feed*))*).ab,ti.**) NOT (**exp animals/ NOT humans/**) NOT (**congresses OR editorial**)**.pt.  *Limits Publication Year: 1997-2018*  ***Cochrane Central (trials):*** *(1997-2018; limited in EndNote)*  **(**(((enteric* OR enteral* OR tube* OR gastric* OR parenteral* OR support*) NEAR/3 (nutrition* OR feeding*))):ab,ti**) AND (**(child* OR infant* OR newborn* OR pediatr* OR paediatr* OR PICU*):ab,ti**) AND *(****(((intensive OR critical*) NEAR/3 (care OR ill*)) OR ICU OR PICU* OR 'high risk'):ab,ti****)* AND (**(timing *OR time* OR ((early) NEAR/3 (late OR feeding OR nutrition*)) OR ((late OR full OR delay*) NEAR/3 (feeding OR nutrition*)) OR (trophic NEAR/3 full) OR 'minimal enteral' OR 'rate of increase' *OR ((total* OR supplement* OR partial*) NEAR/3 (PN OR nutrition* OR feed*))*):ab,ti**)**  ***Web of Science:***  **TS=((**(((enteric* OR enteral* OR tube* OR gastric* OR parenteral* OR support*) NEAR/2 (nutrition* OR feeding*)))**) AND (**(child* OR infant* OR newborn* OR pediatr* OR paediatr* OR PICU*)**) AND *(****(((intensive OR critical*) NEAR/2 (care OR ill*)) OR ICU OR PICU* OR "high risk")****)* AND (**(timing *OR time* OR ((early) NEAR/2 (late OR feeding OR nutrition*)) OR ((late OR full OR delay*) NEAR/2 (feeding OR nutrition*)) OR (trophic NEAR/2 full) OR "minimal enteral" OR "rate of increase" *OR ((total* OR supplement* OR partial*) NEAR/2 (PN OR nutrition* OR feed*))*)**) NOT** ((animal* OR rat OR rats OR pig* OR swine*) NOT (human* OR patient*))) AND DT=Article  *from: 1997-2018* |
| Question 3.  In critically ill children on hemodynamic support (vasoactive medications, extracorporeal life support ECLS) does enteral feeding compared to no enteral feeding affect outcomes? | ***Embase.com (Embase incl. Medline):***  **(**'enteric feeding'/**mj/**de OR 'parenteral nutrition'/**mj/**exp OR 'nutritional support'/**mj**/deOR (((enteric* OR enteral* OR tube* OR gastric* OR parenteral* OR support*) NEAR/3 (nutrition* OR feeding*))):ab,ti**) AND (**'child'/exp OR 'adolescent'/exp OR 'pediatrics'/exp OR 'pediatric hospital'/de OR 'pediatric intensive care unit'/de OR 'newborn intensive care'/de OR (child* OR infant* OR newborn* OR pediatr* OR paediatr* OR PICU*):ab,ti**) AND (**'pediatric intensive care unit'/de OR 'newborn intensive care'/de *OR 'intensive care'/de* OR 'intensive care unit'/de OR 'high risk population'/de OR 'critically ill patient'/de *OR 'intensive care nursing'/exp* OR (((intensive OR critical*) NEAR/3 (care OR ill*)) OR ICU OR PICU* OR 'high risk'):ab,ti**) AND (**'risk'/exp OR 'treatment contraindication'/de OR 'complication'/exp OR *'hypertensive agent'/de* OR *'catecholamine'/exp* OR *'prostaglandin'/exp* OR 'vasoconstrictor agent'/exp OR 'resuscitation'/de OR 'extracorporeal circulation'/exp OR (risk* OR complication* OR contraindicat* OR vasopressor* OR catecholamin* OR adrenalin* OR epinephrin* OR noradrenalin* OR norepinephin* OR vasopressin* OR dopamin* OR phenylefrin* *OR prostaglandin** OR vasoconstrict* OR argipressin* OR terlipressin* OR resuscitat* OR reanimat* OR ((extracorporeal* OR 'extra corporeal') NEAR/3 (circulation* OR oxygenation* OR perfusion* OR support*)) OR ECMO OR ECLS OR bypass* OR ((umbilical) NEXT/1 (catheter* OR infusion*))):ab,ti**) NOT (**[animals]/lim NOT [humans]/lim**) NOT (**'Conference Abstract' OR 'Editorial'**)/it AND [**1997-2018]/py  ***Medline Epub (Ovid):***  **(**exp *"Nutritional Support"/OR (((enteric* OR enteral* OR tube* OR gastric* OR parenteral* OR support*) ADJ3 (nutrition* OR feeding*))).ab,ti.**) AND (**exp "Child"/ OR "Infant"/ OR "Infant, Newborn"/ OR "Adolescent"/ OR exp "Pediatrics"/ OR "Hospitals, Pediatric"/ OR exp "Intensive Care Units, Pediatric"/ OR "Intensive Care, Neonatal"/ OR (child* OR infant* OR newborn* OR pediatr* OR paediatr* OR PICU*).ab,ti.**) AND (**exp "Intensive Care Units"/ OR exp "Critical Care"/ OR "Critical Illness"/ *OR "Critical Care Nursing"/* OR (((intensive OR critical*) ADJ3 (care OR ill*)) OR ICU OR PICU* OR "high risk").ab,ti.**) AND (**exp "Risk"/ OR *"Failure to Rescue, Health Care"/* OR "Catecholamines"/ OR exp "Prostaglandins"/ OR exp "Vasoconstrictor Agents"/ OR exp "Resuscitation"/ OR exp "Extracorporeal Circulation"/ OR (risk* OR complication* OR contraindicat* OR vasopressor* OR catecholamin* OR adrenalin* OR epinephrin* OR noradrenalin* OR norepinephin* OR vasopressin* OR dopamin* OR phenylefrin* OR prostaglandin* OR vasoconstrict* OR argipressin* OR terlipressin* OR resuscitat* OR reanimat* OR ((extracorporeal* OR "extra corporeal") ADJ3 (circulation* OR oxygenation* OR perfusion* OR support*)) OR ECMO OR ECLS OR bypass* OR ((umbilical) ADJ1 (catheter* OR infusion*))).ab,ti.**) NOT (**exp animals/ NOT humans/**) NOT (**"congresses" OR "editorial"**)**.pt.  *Limits Publication year: 1997-2018*  ***Cochrane Central (trials):*** *(1997-2018)*  **(**(((enteric* OR enteral* OR tube* OR gastric* OR parenteral* OR support*) NEAR/3 (nutrition* OR feeding*))):ab,ti**) AND (**(child* OR infant* OR newborn* OR pediatr* OR paediatr* OR PICU*):ab,ti**) AND (**(((intensive OR critical*) NEAR/3 (care OR ill*)) OR ICU OR PICU* OR 'high risk'):ab,ti**) AND (**(risk* OR complication* OR contraindicat* OR vasopressor* OR catecholamin* OR adrenalin* OR epinephrin* OR noradrenalin* OR norepinephin* OR vasopressin* OR dopamin* OR phenylefrin* OR prostaglandin* OR vasoconstrict* OR argipressin* OR terlipressin* OR resuscitat* OR reanimat* OR ((extracorporeal* OR 'extra corporeal') NEAR/3 (circulation* OR oxygenation* OR perfusion* OR support*)) OR ECMO OR ECLS OR bypass* OR ((umbilical) NEXT/1 (catheter* OR infusion*))):ab,ti**)**  ***Web of Science:***  **TS=((**(((enteric* OR enteral* OR tube* OR gastric* OR parenteral* OR support*) NEAR/2 (nutrition* OR feeding*)))**) AND (**(child* OR infant* OR newborn* OR pediatr* OR paediatr* OR PICU*)**) AND (**(((intensive OR critical*) NEAR/2 (care OR ill*)) OR ICU OR PICU* OR "high risk")**) AND (**(risk* OR complication* OR contraindicat* OR vasopressor* OR catecholamin* OR adrenalin* OR epinephrin* OR noradrenalin* OR norepinephin* OR vasopressin* OR dopamin* OR phenylefrin* OR prostaglandin* OR vasoconstrict* OR argipressin* OR terlipressin* OR resuscitat* OR reanimat* OR ((extracorporeal* OR "extra corporeal") NEAR/2 (circulation* OR oxygenation* OR perfusion* OR support*)) OR ECMO OR ECLS OR bypass* OR ((umbilical) NEAR/1 (catheter* OR infusion*)))**) NOT** ((animal* OR rat OR rats OR pig* OR swine*) NOT (human* OR patient*))) **AND DT=**Article  *From: 1997-2018* |
| Question 4.  In critically ill term neonates with umbilical arterial catheters and/or PGE1 infusions, does enteral feeding impact on adverse events? | ***Embase.com (Embase incl. Medline):***  **(**'enteric feeding'/**mj/**de OR 'parenteral nutrition'/**mj/**exp OR 'nutritional support'/**mj**/deOR (((enteric* OR enteral* OR tube* OR gastric* OR parenteral* OR support*) NEAR/3 (nutrition* OR feeding*))):ab,ti**) AND (**'child'/exp OR 'adolescent'/exp OR 'pediatrics'/exp OR 'pediatric hospital'/de OR 'pediatric intensive care unit'/de OR 'newborn intensive care'/de OR (child* OR infant* OR newborn* OR pediatr* OR paediatr* OR PICU*):ab,ti**) AND (**'pediatric intensive care unit'/de OR 'newborn intensive care'/de *OR 'intensive care'/de* OR 'intensive care unit'/de OR 'high risk population'/de OR 'critically ill patient'/de *OR 'intensive care nursing'/exp* OR (((intensive OR critical*) NEAR/3 (care OR ill*)) OR ICU OR PICU* OR 'high risk'):ab,ti**) AND (**'risk'/exp OR 'treatment contraindication'/de OR 'complication'/exp OR *'hypertensive agent'/de* OR *'catecholamine'/exp* OR *'prostaglandin'/exp* OR 'vasoconstrictor agent'/exp OR 'resuscitation'/de OR 'extracorporeal circulation'/exp OR (risk* OR complication* OR contraindicat* OR vasopressor* OR catecholamin* OR adrenalin* OR epinephrin* OR noradrenalin* OR norepinephin* OR vasopressin* OR dopamin* OR phenylefrin* *OR prostaglandin** OR vasoconstrict* OR argipressin* OR terlipressin* OR resuscitat* OR reanimat* OR ((extracorporeal* OR 'extra corporeal') NEAR/3 (circulation* OR oxygenation* OR perfusion* OR support*)) OR ECMO OR ECLS OR bypass* OR ((umbilical) NEXT/1 (catheter* OR infusion*))):ab,ti**) NOT (**[animals]/lim NOT [humans]/lim**) NOT (**'Conference Abstract' OR 'Editorial'**)/it AND [**1997-2018]/py  ***Medline Epub (Ovid):***  **(**exp *"Nutritional Support"/OR (((enteric* OR enteral* OR tube* OR gastric* OR parenteral* OR support*) ADJ3 (nutrition* OR feeding*))).ab,ti.**) AND (**exp "Child"/ OR "Infant"/ OR "Infant, Newborn"/ OR "Adolescent"/ OR exp "Pediatrics"/ OR "Hospitals, Pediatric"/ OR exp "Intensive Care Units, Pediatric"/ OR "Intensive Care, Neonatal"/ OR (child* OR infant* OR newborn* OR pediatr* OR paediatr* OR PICU*).ab,ti.**) AND (**exp "Intensive Care Units"/ OR exp "Critical Care"/ OR "Critical Illness"/ *OR "Critical Care Nursing"/* OR (((intensive OR critical*) ADJ3 (care OR ill*)) OR ICU OR PICU* OR "high risk").ab,ti.**) AND (**exp "Risk"/ OR *"Failure to Rescue, Health Care"/* OR "Catecholamines"/ OR exp "Prostaglandins"/ OR exp "Vasoconstrictor Agents"/ OR exp "Resuscitation"/ OR exp "Extracorporeal Circulation"/ OR (risk* OR complication* OR contraindicat* OR vasopressor* OR catecholamin* OR adrenalin* OR epinephrin* OR noradrenalin* OR norepinephin* OR vasopressin* OR dopamin* OR phenylefrin* OR prostaglandin* OR vasoconstrict* OR argipressin* OR terlipressin* OR resuscitat* OR reanimat* OR ((extracorporeal* OR "extra corporeal") ADJ3 (circulation* OR oxygenation* OR perfusion* OR support*)) OR ECMO OR ECLS OR bypass* OR ((umbilical) ADJ1 (catheter* OR infusion*))).ab,ti.**) NOT (**exp animals/ NOT humans/**) NOT (**"congresses" OR "editorial"**)**.pt.  *Limits Publication year: 1997-2018*  ***Cochrane Central (trials):*** *(1997-2018)*  **(**(((enteric* OR enteral* OR tube* OR gastric* OR parenteral* OR support*) NEAR/3 (nutrition* OR feeding*))):ab,ti**) AND (**(child* OR infant* OR newborn* OR pediatr* OR paediatr* OR PICU*):ab,ti**) AND (**(((intensive OR critical*) NEAR/3 (care OR ill*)) OR ICU OR PICU* OR 'high risk'):ab,ti**) AND (**(risk* OR complication* OR contraindicat* OR vasopressor* OR catecholamin* OR adrenalin* OR epinephrin* OR noradrenalin* OR norepinephin* OR vasopressin* OR dopamin* OR phenylefrin* OR prostaglandin* OR vasoconstrict* OR argipressin* OR terlipressin* OR resuscitat* OR reanimat* OR ((extracorporeal* OR 'extra corporeal') NEAR/3 (circulation* OR oxygenation* OR perfusion* OR support*)) OR ECMO OR ECLS OR bypass* OR ((umbilical) NEXT/1 (catheter* OR infusion*))):ab,ti**)**  ***Web of Science:***  **TS=((**(((enteric* OR enteral* OR tube* OR gastric* OR parenteral* OR support*) NEAR/2 (nutrition* OR feeding*)))**) AND (**(child* OR infant* OR newborn* OR pediatr* OR paediatr* OR PICU*)**) AND (**(((intensive OR critical*) NEAR/2 (care OR ill*)) OR ICU OR PICU* OR "high risk")**) AND (**(risk* OR complication* OR contraindicat* OR vasopressor* OR catecholamin* OR adrenalin* OR epinephrin* OR noradrenalin* OR norepinephin* OR vasopressin* OR dopamin* OR phenylefrin* OR prostaglandin* OR vasoconstrict* OR argipressin* OR terlipressin* OR resuscitat* OR reanimat* OR ((extracorporeal* OR "extra corporeal") NEAR/2 (circulation* OR oxygenation* OR perfusion* OR support*)) OR ECMO OR ECLS OR bypass* OR ((umbilical) NEAR/1 (catheter* OR infusion*)))**) NOT** ((animal* OR rat OR rats OR pig* OR swine*) NOT (human* OR patient*))) **AND DT=**Article  *From: 1997-2018* |
| Question 5.  In critically ill children what are their energy requirements? | ***Embase.com (Embase incl. Medline),***  **(**'enteric feeding'/**mj/**de OR 'parenteral nutrition'/**mj/**exp OR 'nutritional support'/**mj**/deOR (((enteric* OR enteral* OR tube* OR gastric* OR parenteral* OR support*) NEAR/3 (nutrition* OR feeding*))):ab,ti**) AND (**'child'/exp OR 'adolescent'/exp OR 'pediatrics'/exp OR 'pediatric hospital'/de OR 'pediatric intensive care unit'/de OR 'newborn intensive care'/de OR (child* OR infant* OR newborn* OR pediatr* OR paediatr* OR PICU*):ab,ti**) AND (**'pediatric intensive care unit'/de OR 'newborn intensive care'/de *OR 'intensive care'/de* OR 'intensive care unit'/de OR 'high risk population'/de OR 'critically ill patient'/de *OR 'intensive care nursing'/exp* OR (((intensive OR critical*) NEAR/3 (care OR ill*)) OR ICU OR PICU* OR 'high risk'):ab,ti**) AND (**'calorimetry'/exp OR 'energy expenditure'/exp OR (calori* OR hypocalor* OR hypercalor* OR normocalor* OR ((energy) NEAR/4 (optimal* OR high* OR low* OR expenditur* OR requir* OR goal* OR target* OR intak*))):ab,ti**) NOT (**[animals]/lim NOT [humans]/lim**) NOT (**'Conference Abstract' OR 'Editorial'**)/**it **AND [**1997-2018]/py  ***Medline Epub (Ovid):***  **(**exp *"Nutritional Support"/OR (((enteric* OR enteral* OR tube* OR gastric* OR parenteral* OR support*) ADJ3 (nutrition* OR feeding*))).ab,ti.**) AND (**exp "Child"/ OR "Infant"/ OR "Infant, Newborn"/ OR "Adolescent"/ OR exp "Pediatrics"/ OR "Hospitals, Pediatric"/ OR exp "Intensive Care Units, Pediatric"/ OR "Intensive Care, Neonatal"/ OR (child* OR infant* OR newborn* OR pediatr* OR paediatr* OR PICU*).ab,ti.**) AND (**exp "Intensive Care Units"/ OR exp "Critical Care"/ OR "Critical Illness"/ *OR "Critical Care Nursing"/* OR (((intensive OR critical*) ADJ3 (care OR ill*)) OR ICU OR PICU* OR "high risk").ab,ti.**) AND (**exp "Calorimetry"/ OR exp "Energy Intake"/ OR (calori* OR hypocalor* OR hypercalor* OR normocalor* OR ((energy) ADJ4 (optimal* OR high* OR low* OR expenditur* OR requir* OR goal* OR target* OR intak*))).ab,ti.**) NOT (**exp animals/ NOT humans/**) NOT (**"congresses" OR "editorial"**).**pt.  *Limits Publication year: 1997-2018*  ***Cochrane Central (trials):***  **(**(((enteric* OR enteral* OR tube* OR gastric* OR parenteral* OR support*) NEAR/3 (nutrition* OR feeding*))):ab,ti**) AND (**(child* OR infant* OR newborn* OR pediatr* OR paediatr* OR PICU*):ab,ti**) AND (**(((intensive OR critical*) NEAR/3 (care OR ill*)) OR ICU OR PICU* OR "high risk"):ab,ti**) AND (**(calori* OR hypocalor* OR hypercalor* OR normocalor* OR ((energy) NEAR/4 (optimal* OR high* OR low* OR expenditur* OR requir* OR goal* OR target* OR intak*))):ab,ti**)**  *Selection 1997-2018 in EndNote*  ***Web of Science:***  **TS=((**(((enteric* OR enteral* OR tube* OR gastric* OR parenteral* OR support*) NEAR/2 (nutrition* OR feeding*)))**) AND (**(child* OR infant* OR newborn* OR pediatr* OR paediatr* OR PICU*)**) AND (**(((intensive OR critical*) NEAR/2 (care OR ill*)) OR ICU OR PICU* OR "high risk")**) AND (**(calori* OR hypocalor* OR hypercalor* OR normocalor* OR ((energy) NEAR/3 (optimal* OR high* OR low* OR expenditur* OR requir* OR goal* OR target* OR intak*)))**) NOT** ((animal* OR rat OR rats OR pig* OR swine*) NOT (human* OR patient*))) **AND DT=**Article  *From: 1997-2018* |
| Question 6.  In critically ill children, what is the most accurate method of determining or predicting energy expenditure? | ***Embase.com (Embase incl. Medline),***  **(**'enteric feeding'/**mj/**de OR 'parenteral nutrition'/**mj/**exp OR 'nutritional support'/**mj**/deOR (((enteric* OR enteral* OR tube* OR gastric* OR parenteral* OR support*) NEAR/3 (nutrition* OR feeding*))):ab,ti**) AND (**'child'/exp OR 'adolescent'/exp OR 'pediatrics'/exp OR 'pediatric hospital'/de OR 'pediatric intensive care unit'/de OR 'newborn intensive care'/de OR (child* OR infant* OR newborn* OR pediatr* OR paediatr* OR PICU*):ab,ti**) AND (**'pediatric intensive care unit'/de OR 'newborn intensive care'/de *OR 'intensive care'/de* OR 'intensive care unit'/de OR 'high risk population'/de OR 'critically ill patient'/de *OR 'intensive care nursing'/exp* OR (((intensive OR critical*) NEAR/3 (care OR ill*)) OR ICU OR PICU* OR 'high risk'):ab,ti**) AND (**'calorimetry'/exp OR 'energy expenditure'/exp OR (calori* OR hypocalor* OR hypercalor* OR normocalor* OR ((energy) NEAR/4 (optimal* OR high* OR low* OR expenditur* OR requir* OR goal* OR target* OR intak*))):ab,ti**) NOT (**[animals]/lim NOT [humans]/lim**) NOT (**'Conference Abstract' OR 'Editorial'**)/**it **AND [**1997-2018]/py  ***Medline Epub (Ovid):***  **(**exp *"Nutritional Support"/OR (((enteric* OR enteral* OR tube* OR gastric* OR parenteral* OR support*) ADJ3 (nutrition* OR feeding*))).ab,ti.**) AND (**exp "Child"/ OR "Infant"/ OR "Infant, Newborn"/ OR "Adolescent"/ OR exp "Pediatrics"/ OR "Hospitals, Pediatric"/ OR exp "Intensive Care Units, Pediatric"/ OR "Intensive Care, Neonatal"/ OR (child* OR infant* OR newborn* OR pediatr* OR paediatr* OR PICU*).ab,ti.**) AND (**exp "Intensive Care Units"/ OR exp "Critical Care"/ OR "Critical Illness"/ *OR "Critical Care Nursing"/* OR (((intensive OR critical*) ADJ3 (care OR ill*)) OR ICU OR PICU* OR "high risk").ab,ti.**) AND (**exp "Calorimetry"/ OR exp "Energy Intake"/ OR (calori* OR hypocalor* OR hypercalor* OR normocalor* OR ((energy) ADJ4 (optimal* OR high* OR low* OR expenditur* OR requir* OR goal* OR target* OR intak*))).ab,ti.**) NOT (**exp animals/ NOT humans/**) NOT (**"congresses" OR "editorial"**).**pt.  *Limits Publication year: 1997-2018*  ***Cochrane Central (trials):***  **(**(((enteric* OR enteral* OR tube* OR gastric* OR parenteral* OR support*) NEAR/3 (nutrition* OR feeding*))):ab,ti**) AND (**(child* OR infant* OR newborn* OR pediatr* OR paediatr* OR PICU*):ab,ti**) AND (**(((intensive OR critical*) NEAR/3 (care OR ill*)) OR ICU OR PICU* OR "high risk"):ab,ti**) AND (**(calori* OR hypocalor* OR hypercalor* OR normocalor* OR ((energy) NEAR/4 (optimal* OR high* OR low* OR expenditur* OR requir* OR goal* OR target* OR intak*))):ab,ti**)**  *Selection 1997-2018 in EndNote*  ***Web of Science:***  **TS=((**(((enteric* OR enteral* OR tube* OR gastric* OR parenteral* OR support*) NEAR/2 (nutrition* OR feeding*)))**) AND (**(child* OR infant* OR newborn* OR pediatr* OR paediatr* OR PICU*)**) AND (**(((intensive OR critical*) NEAR/2 (care OR ill*)) OR ICU OR PICU* OR "high risk")**) AND (**(calori* OR hypocalor* OR hypercalor* OR normocalor* OR ((energy) NEAR/3 (optimal* OR high* OR low* OR expenditur* OR requir* OR goal* OR target* OR intak*)))**) NOT** ((animal* OR rat OR rats OR pig* OR swine*) NOT (human* OR patient*))) **AND DT=**Article  *From: 1997-2018* |
| Question 7.  In critically ill children, what are the macronutrient requirements? | ***Embase.com (Embase incl. Medline):***  **(**'enteric feeding'/**mj/**de OR 'parenteral nutrition'/**mj/**exp OR 'nutritional support'/**mj**/deOR (((enteric* OR enteral* OR tube* OR gastric* OR parenteral* OR support*) NEAR/3 (nutrition* OR feeding*))):ab,ti**) AND (**'child'/exp OR 'adolescent'/exp OR 'pediatrics'/exp OR 'pediatric hospital'/de OR 'pediatric intensive care unit'/de OR 'newborn intensive care'/de OR (child* OR infant* OR newborn* OR pediatr* OR paediatr* OR PICU*):ab,ti**) AND (**'pediatric intensive care unit'/de OR 'newborn intensive care'/de *OR 'intensive care'/de* OR 'intensive care unit'/de OR 'high risk population'/de OR 'critically ill patient'/de *OR 'intensive care nursing'/exp* OR (((intensive OR critical*) NEAR/3 (care OR ill*)) OR ICU OR PICU* OR 'high risk'):ab,ti**) AND** ('protein metabolism'/exp OR 'protein requirement'/de OR 'protein'/de/mj OR 'amino acid'/de OR (((protein* OR 'amino acid' OR 'amino acids') NEAR/4 (optimal* OR high* OR low* OR requir* OR deliver* OR administ* OR intake* OR feeding* OR metabol* OR suppl* OR infusion* OR dos*))):ab,ti) **NOT (**[animals]/lim NOT [humans]/lim**) NOT (**'Conference Abstract' OR 'Editorial'**)/it AND [**1997-2018]/py  ***Medline Epub (Ovid):***  **(**exp *"Nutritional Support"/OR (((enteric* OR enteral* OR tube* OR gastric* OR parenteral* OR support*) ADJ3 (nutrition* OR feeding*))).ab,ti.**) AND (**exp "Child"/ OR "Infant"/ OR "Infant, Newborn"/ OR "Adolescent"/ OR exp "Pediatrics"/ OR "Hospitals, Pediatric"/ OR exp "Intensive Care Units, Pediatric"/ OR "Intensive Care, Neonatal"/ OR (child* OR infant* OR newborn* OR pediatr* OR paediatr* OR PICU*).ab,ti.**) AND (**exp "Intensive Care Units"/ OR exp "Critical Care"/ OR "Critical Illness"/ *OR "Critical Care Nursing"/* OR (((intensive OR critical*) ADJ3 (care OR ill*)) OR ICU OR PICU* OR "high risk").ab,ti.**) AND** ("Proteins"/ OR "Amino Acids"/ OR (((protein* OR "amino acid" OR "amino acids") ADJ4 (optimal* OR high* OR low* OR requir* OR deliver* OR administ* OR intake* OR feeding* OR metabol* OR suppl* OR infusion* OR dos*))).ab,ti.) **NOT (**exp animals/ NOT humans/**) NOT (**"congresses" OR "editorial"**).**pt.  *Limits Publication year: 1997-2018*  ***Cochrane Central (trials):***  **(**(((enteric* OR enteral* OR tube* OR gastric* OR parenteral* OR support*) NEAR/3 (nutrition* OR feeding*))):ab,ti**) AND (**(child* OR infant* OR newborn* OR pediatr* OR paediatr* OR PICU*):ab,ti**) AND (**(((intensive OR critical*) NEAR/3 (care OR ill*)) OR ICU OR PICU* OR 'high risk'):ab,ti**) AND** ((((protein* OR 'amino acid' OR 'amino acids') NEAR/4 (optimal* OR high* OR low* OR requir* OR deliver* OR administ* OR intake* OR feeding* OR metabol* OR suppl* OR infusion* OR dos*))):ab,ti)  *Selection 1997-2018 in EndNote*  ***Web of Science:***  **TS=((**(((enteric* OR enteral* OR tube* OR gastric* OR parenteral* OR support*) NEAR/2 (nutrition* OR feeding*)))**) AND (**(child* OR infant* OR newborn* OR pediatr* OR paediatr* OR PICU*)**) AND (**(((intensive OR critical*) NEAR/2 (care OR ill*)) OR ICU OR PICU* OR "high risk")**) AND** ((((protein* OR "amino acid" OR "amino acids") NEAR/3 (optimal* OR high* OR low* OR requir* OR deliver* OR administ* OR intake* OR feeding* OR metabol* OR suppl* OR infusion* OR dos*)))) **NOT** ((animal* OR rat OR rats OR pig* OR swine*) NOT (human* OR patient*))) **AND DT=**Article  *From: 1997-2018* |
| Question 8.  In critically ill children, do different feed formulas (polymeric vs. semi-elemental feed, standard vs. enriched formula) impact on clinical outcomes? | ***Embase.com (Embase incl. Medline):***  **(**'enteric feeding'/**mj/**de OR 'parenteral nutrition'/**mj/**exp OR 'nutritional support'/**mj**/deOR (((enteric* OR enteral* OR tube* OR gastric* OR parenteral* OR support*) NEAR/3 (nutrition* OR feeding*))):ab,ti**) AND (**'child'/exp OR 'adolescent'/exp OR 'pediatrics'/exp OR 'pediatric hospital'/de OR 'pediatric intensive care unit'/de OR 'newborn intensive care'/de OR (child* OR infant* OR newborn* OR pediatr* OR paediatr* OR PICU*):ab,ti**) AND (**'pediatric intensive care unit'/de OR 'newborn intensive care'/de *OR 'intensive care'/de* OR 'intensive care unit'/de OR 'high risk population'/de OR 'critically ill patient'/de *OR 'intensive care nursing'/exp* OR (((intensive OR critical*) NEAR/3 (care OR ill*)) OR ICU OR PICU* OR 'high risk'):ab,ti**) AND (**'polymer'/exp OR 'elemental diet'/de OR 'low calory diet'/de OR (polymer* OR elemental* OR ((formula*) NEAR/3 (food* OR diet*)) OR calor* OR hypocalor* OR normocalor* OR hypercalor*):ab,ti**) NOT (**[animals]/lim NOT [humans]/lim**) NOT (**'Conference Abstract' OR 'Editorial'**)/**it **AND [**1997-2018]/py  ***Medline Epub (Ovid):***  **(**exp *"Nutritional Support"/OR (((enteric* OR enteral* OR tube* OR gastric* OR parenteral* OR support*) ADJ3 (nutrition* OR feeding*))).ab,ti.**) AND (**exp "Child"/ OR "Infant"/ OR "Infant, Newborn"/ OR "Adolescent"/ OR exp "Pediatrics"/ OR "Hospitals, Pediatric"/ OR exp "Intensive Care Units, Pediatric"/ OR "Intensive Care, Neonatal"/ OR (child* OR infant* OR newborn* OR pediatr* OR paediatr* OR PICU*).ab,ti.**) AND (**exp "Intensive Care Units"/ OR exp "Critical Care"/ OR "Critical Illness"/ *OR "Critical Care Nursing"/* OR (((intensive OR critical*) ADJ3 (care OR ill*)) OR ICU OR PICU* OR "high risk").ab,ti.**) AND (**exp "Polymers"/ OR "Food, Formulated"/ OR "Caloric Restriction"/ OR (polymer* OR elemental* OR ((formula*) ADJ3 (food* OR diet*)) OR calor* OR hypocalor* OR normocalor* OR hypercalor*).ab,ti.**) NOT (**exp animals/ NOT humans/**) NOT (**"congresses" OR "editorial"**).**pt.  *Limits Publication year: 1997-2018*  ***Cochrane Central (trials): Selected at years 1997-2018 in EndNote (NEW file)***  **(**(((enteric* OR enteral* OR tube* OR gastric* OR parenteral* OR support*) NEAR/3 (nutrition* OR feeding*))):ab,ti**) AND (**(child* OR infant* OR newborn* OR pediatr* OR paediatr* OR PICU*):ab,ti**) AND (**(((intensive OR critical*) NEAR/3 (care OR ill*)) OR ICU OR PICU* OR 'high risk'):ab,ti**) AND (**(polymer* OR elemental* OR ((formula*) NEAR/3 (food* OR diet*)) OR calor* OR hypocalor* OR normocalor* OR hypercalor*):ab,ti**)**  ***Web of Science:***  **TS=((**(((enteric* OR enteral* OR tube* OR gastric* OR parenteral* OR support*) NEAR/2 (nutrition* OR feeding*)))**) AND (**(child* OR infant* OR newborn* OR pediatr* OR paediatr* OR PICU*)**) AND (**(((intensive OR critical*) NEAR/2 (care OR ill*)) OR ICU OR PICU* OR "high risk")**) AND (**(polymer* OR elemental* OR ((formula*) NEAR/2 (food* OR diet*)) OR calor* OR hypocalor* OR normocalor* OR hypercalor*)**) NOT** ((animal* OR rat OR rats OR pig* OR swine*) NOT (human* OR patient*))) **AND DT=**Article  *From: 1997-2018* |
| Question 9.  In critically ill children, does pharmaconutrition (glutamine, lipids and/or micronutrients) impact on clinical outcomes? | ***Embase.com (Embase incl. Medline):***  **(**'enteric feeding'/**mj/**de OR 'parenteral nutrition'/**mj/**exp OR 'nutritional support'/**mj**/deOR (((enteric* OR enteral* OR tube* OR gastric* OR parenteral* OR support*) NEAR/3 (nutrition* OR feeding*))):ab,ti**) AND (**'child'/exp OR 'adolescent'/exp OR 'pediatrics'/exp OR 'pediatric hospital'/de OR 'pediatric intensive care unit'/de OR 'newborn intensive care'/de OR (child* OR infant* OR newborn* OR pediatr* OR paediatr* OR PICU*):ab,ti**) AND (**'pediatric intensive care unit'/de OR 'newborn intensive care'/de *OR 'intensive care'/de* OR 'intensive care unit'/de OR 'high risk population'/de OR 'critically ill patient'/de *OR 'intensive care nursing'/exp* OR (((intensive OR critical*) NEAR/3 (care OR ill*)) OR ICU OR PICU* OR 'high risk'):ab,ti**) AND** ('immunomodulation'/de OR 'immunomodulatory activity'/de *OR 'immunopotentiation'/exp* OR 'lipid'/exp OR 'vitamin'/exp OR 'trace element'/exp OR (immunomodulat* OR neuroimmunomodulat* *OR immunopotentiat* OR immunostimulat** OR ((immun*) NEAR/4 (modulat* OR function* OR respon* *OR potentiat* OR stimulat**)) OR lipid* OR ((nutrition*) NEAR/3 (supplement*)) OR vitamin* OR ((trace) NEXT/1 (element*)) OR micronutrient* *OR multivitamin* OR 'fish oil' OR fat OR fats OR ((fatty OR folic) NEAR/1 acid*) OR cholesterol**):ab,ti) **NOT (**[animals]/lim NOT [humans]/lim**) NOT (**'Conference Abstract' OR 'Editorial'**)/it AND [**1997-2018]/py  ***Medline Epub (Ovid):***  **(**exp *"Nutritional Support"/OR (((enteric* OR enteral* OR tube* OR gastric* OR parenteral* OR support*) ADJ3 (nutrition* OR feeding*))).ab,ti.**) AND (**exp "Child"/ OR "Infant"/ OR "Infant, Newborn"/ OR "Adolescent"/ OR exp "Pediatrics"/ OR "Hospitals, Pediatric"/ OR exp "Intensive Care Units, Pediatric"/ OR "Intensive Care, Neonatal"/ OR (child* OR infant* OR newborn* OR pediatr* OR paediatr* OR PICU*).ab,ti.**) AND (**exp "Intensive Care Units"/ OR exp "Critical Care"/ OR "Critical Illness"/ *OR "Critical Care Nursing"/* OR (((intensive OR critical*) ADJ3 (care OR ill*)) OR ICU OR PICU* OR "high risk").ab,ti.**) AND (**"Immunomodulation"/ OR "lipid"/ OR "vitamin"/ OR "trace element"/ OR (immunomodulat* OR neuroimmunomodulat* *OR immunopotentiat* OR immunostimulat** OR ((immun*) ADJ4 (modulat* OR function* OR respon* *OR potentiat* OR stimulat**)) OR lipid* OR ((nutrition*) ADJ3 (supplement*)) OR vitamin* OR ((trace) ADJ (element*)) OR micronutrient* *OR multivitamin* OR "fish oil" OR fat OR fats OR ((fatty OR folic) ADJ1 acid*) OR cholesterol**).ab,ti.**) NOT (**exp animals/ NOT humans/**) NOT (**"congresses" OR "editorial"**).**pt.  *Limits Publication year: 1997-2018*  ***Cochrane Central (trials):***  **(**(((enteric* OR enteral* OR tube* OR gastric* OR parenteral* OR support*) NEAR/3 (nutrition* OR feeding*))):ab,ti**) AND (**(child* OR infant* OR newborn* OR pediatr* OR paediatr* OR PICU*):ab,ti**) AND (**(((intensive OR critical*) NEAR/3 (care OR ill*)) OR ICU OR PICU* OR 'high risk'):ab,ti**) AND (**(immunomodulat* OR neuroimmunomodulat* *OR immunopotentiat* OR immunostimulat** OR ((immun*) NEAR/4 (modulat* OR function* OR respon* *OR potentiat* OR stimulat**)) OR lipid* OR ((nutrition*) NEAR/3 (supplement*)) OR vitamin* OR ((trace) NEXT/1 (element*)) OR micronutrient* *OR multivitamin* OR 'fish oil' OR fat OR fats OR ((fatty OR folic) NEAR/1 acid*) OR cholesterol**):ab,ti**)**  ***Web of Science:***  **TS=((**(((enteric* OR enteral* OR tube* OR gastric* OR parenteral* OR support*) NEAR/2 (nutrition* OR feeding*)))**) AND (**(child* OR infant* OR newborn* OR pediatr* OR paediatr* OR PICU*)**) AND (**(((intensive OR critical*) NEAR/2 (care OR ill*)) OR ICU OR PICU* OR "high risk")**) AND (**(immunomodulat* OR neuroimmunomodulat* *OR immunopotentiat* OR immunostimulat** OR ((immun*) NEAR/3 (modulat* OR function* OR respon* *OR potentiat* OR stimulat**)) OR lipid* OR ((nutrition*) NEAR/2 (supplement*)) OR vitamin* OR ((trace) NEAR/1 (element*)) OR micronutrient* *OR multivitamin* OR 'fish oil' OR fat OR fats OR ((fatty OR folic) NEAR/1 acid*) OR cholesterol**)**) NOT** ((animal* OR rat OR rats OR pig* OR swine*) NOT (human* OR patient*))) **AND DT=**Article  *From: 1997-2018* |
| Question 10.  In critically ill children, does continuous feeding compared to intermittent bolus gastric feeding impact on outcomes? | ***Embase.com:***  **(**'enteric feeding'/**mj/**de OR 'parenteral nutrition'/**mj/**exp OR 'nutritional support'/**mj**/deOR (((enteric* OR enteral* OR tube* OR gastric* OR parenteral* OR support*) NEAR/3 (nutrition* OR feeding*))):ab,ti**) AND (**'child'/exp OR 'adolescent'/exp OR 'pediatrics'/exp OR 'pediatric hospital'/de OR 'pediatric intensive care unit'/de OR 'newborn intensive care'/de OR (child* OR infant* OR newborn* OR pediatr* OR paediatr* OR PICU*):ab,ti**) AND (**'pediatric intensive care unit'/de OR 'newborn intensive care'/de *OR 'intensive care'/de* OR 'intensive care unit'/de OR 'high risk population'/de OR 'critically ill patient'/de *OR 'intensive care nursing'/exp* OR (((intensive OR critical*) NEAR/3 (care OR ill*)) OR ICU OR PICU* OR 'high risk'):ab,ti**) AND (**'digestive tube'/exp OR (((gastric* OR gastrojejunal* OR nasogastric* OR jejun* OR nasojejunal OR ileal OR 'post pyloric' OR stomach OR enterostomy OR enteral OR digestive*) NEAR/3 (tube* OR catheter*)) OR 'G-tube'):ab,ti**) NOT (**[animals]/lim NOT [humans]/lim**) NOT (**'Conference Abstract' OR 'Editorial'**)/**it **AND [**1997-2018]/py  ***Medline Epub (Ovid):***  **(**exp *"Nutritional Support"/OR (((enteric* OR enteral* OR tube* OR gastric* OR parenteral* OR support*) ADJ3 (nutrition* OR feeding*))).ab,ti.**) AND (**exp "Child"/ OR "Infant"/ OR "Infant, Newborn"/ OR "Adolescent"/ OR exp "Pediatrics"/ OR "Hospitals, Pediatric"/ OR exp "Intensive Care Units, Pediatric"/ OR "Intensive Care, Neonatal"/ OR (child* OR infant* OR newborn* OR pediatr* OR paediatr* OR PICU*).ab,ti.**) AND (**exp "Intensive Care Units"/ OR exp "Critical Care"/ OR "Critical Illness"/ *OR "Critical Care Nursing"/* OR (((intensive OR critical*) ADJ3 (care OR ill*)) OR ICU OR PICU* OR "high risk").ab,ti.**) AND (**(((gastric* OR gastrojejunal* OR nasogastric* OR jejun* OR nasojejunal OR ileal OR 'post pyloric' OR stomach OR enterostomy OR enteral OR digestive) ADJ3 (tube* OR catheter*)) OR 'G-tube').ab,ti.**) NOT (**exp animals/ NOT humans/**) NOT (**"congresses" OR "editorial"**).**pt**.**  *Limits Publication year: 1997-2018*  ***Cochrane Central (trials):***  *(publication years; select publications in EndNote)*  **(**(((enteric* OR enteral* OR tube* OR gastric* OR parenteral* OR support*) NEAR/3 (nutrition* OR feeding*))):ab,ti**) AND (**(child* OR infant* OR newborn* OR pediatr* OR paediatr* OR PICU*):ab,ti**) AND (**(((intensive OR critical*) NEAR/3 (care OR ill*)) OR ICU OR PICU* OR 'high risk'):ab,ti**) AND (**(((gastric* OR gastrojejunal* OR nasogastric* OR jejun* OR nasojejunal OR ileal OR 'post pyloric' OR stomach OR enterostomy OR enteral OR digestive) NEAR/3 (tube* OR catheter*)) OR 'G-tube'):ab,ti**)**  ***Web of Science:***  **TS=((**(((enteric* OR enteral* OR tube* OR gastric* OR parenteral* OR support*) NEAR/2 (nutrition* OR feeding*)))**) AND (**(child* OR infant* OR newborn* OR pediatr* OR paediatr* OR PICU*)**) AND (**(((intensive OR critical*) NEAR/2 (care OR ill*)) OR ICU OR PICU* OR "high risk")**) AND (**(((gastric* OR gastrojejunal* OR nasogastric* OR jejun* OR nasojejunal OR ileal OR "post pyloric" OR stomach OR enterostomy OR enteral OR digestive) NEAR/2 (tube* OR catheter*)) OR "G-tube")**) NOT** ((animal* OR rat OR rats OR pig* OR swine*) NOT (human* OR patient*))) **AND** DT=Article  *From: 1997-2018* |
| Question 11.  In critically ill children, does gastric feeding compared to post-pyloric feeding impact on clinical outcomes? | ***Embase.com:***  **(**'enteric feeding'/**mj/**de OR 'parenteral nutrition'/**mj/**exp OR 'nutritional support'/**mj**/deOR (((enteric* OR enteral* OR tube* OR gastric* OR parenteral* OR support*) NEAR/3 (nutrition* OR feeding*))):ab,ti**) AND (**'child'/exp OR 'adolescent'/exp OR 'pediatrics'/exp OR 'pediatric hospital'/de OR 'pediatric intensive care unit'/de OR 'newborn intensive care'/de OR (child* OR infant* OR newborn* OR pediatr* OR paediatr* OR PICU*):ab,ti**) AND (**'pediatric intensive care unit'/de OR 'newborn intensive care'/de *OR 'intensive care'/de* OR 'intensive care unit'/de OR 'high risk population'/de OR 'critically ill patient'/de *OR 'intensive care nursing'/exp* OR (((intensive OR critical*) NEAR/3 (care OR ill*)) OR ICU OR PICU* OR 'high risk'):ab,ti**) AND (**'digestive tube'/exp OR (((gastric* OR gastrojejunal* OR nasogastric* OR jejun* OR nasojejunal OR ileal OR 'post pyloric' OR stomach OR enterostomy OR enteral OR digestive*) NEAR/3 (tube* OR catheter*)) OR 'G-tube'):ab,ti**) NOT (**[animals]/lim NOT [humans]/lim**) NOT (**'Conference Abstract' OR 'Editorial'**)/**it **AND [**1997-2018]/py  ***Medline Epub (Ovid):***  **(**exp *"Nutritional Support"/OR (((enteric* OR enteral* OR tube* OR gastric* OR parenteral* OR support*) ADJ3 (nutrition* OR feeding*))).ab,ti.**) AND (**exp "Child"/ OR "Infant"/ OR "Infant, Newborn"/ OR "Adolescent"/ OR exp "Pediatrics"/ OR "Hospitals, Pediatric"/ OR exp "Intensive Care Units, Pediatric"/ OR "Intensive Care, Neonatal"/ OR (child* OR infant* OR newborn* OR pediatr* OR paediatr* OR PICU*).ab,ti.**) AND (**exp "Intensive Care Units"/ OR exp "Critical Care"/ OR "Critical Illness"/ *OR "Critical Care Nursing"/* OR (((intensive OR critical*) ADJ3 (care OR ill*)) OR ICU OR PICU* OR "high risk").ab,ti.**) AND (**(((gastric* OR gastrojejunal* OR nasogastric* OR jejun* OR nasojejunal OR ileal OR 'post pyloric' OR stomach OR enterostomy OR enteral OR digestive) ADJ3 (tube* OR catheter*)) OR 'G-tube').ab,ti.**) NOT (**exp animals/ NOT humans/**) NOT (**"congresses" OR "editorial"**).**pt**.**  *Limits Publication year: 1997-2018*  ***Cochrane Central (trials):***  *(publication years; select publications in EndNote)*  **(**(((enteric* OR enteral* OR tube* OR gastric* OR parenteral* OR support*) NEAR/3 (nutrition* OR feeding*))):ab,ti**) AND (**(child* OR infant* OR newborn* OR pediatr* OR paediatr* OR PICU*):ab,ti**) AND (**(((intensive OR critical*) NEAR/3 (care OR ill*)) OR ICU OR PICU* OR 'high risk'):ab,ti**) AND (**(((gastric* OR gastrojejunal* OR nasogastric* OR jejun* OR nasojejunal OR ileal OR 'post pyloric' OR stomach OR enterostomy OR enteral OR digestive) NEAR/3 (tube* OR catheter*)) OR 'G-tube'):ab,ti**)**  ***Web of Science:***  **TS=((**(((enteric* OR enteral* OR tube* OR gastric* OR parenteral* OR support*) NEAR/2 (nutrition* OR feeding*)))**) AND (**(child* OR infant* OR newborn* OR pediatr* OR paediatr* OR PICU*)**) AND (**(((intensive OR critical*) NEAR/2 (care OR ill*)) OR ICU OR PICU* OR "high risk")**) AND (**(((gastric* OR gastrojejunal* OR nasogastric* OR jejun* OR nasojejunal OR ileal OR "post pyloric" OR stomach OR enterostomy OR enteral OR digestive) NEAR/2 (tube* OR catheter*)) OR "G-tube")**) NOT** ((animal* OR rat OR rats OR pig* OR swine*) NOT (human* OR patient*))) **AND** DT=Article  *From: 1997-2018* |
| Question 12.  In critically ill children does routine Gastric Residual Volume (GRV) to guide enteral feeding impact on outcomes? | ***Embase.com (Embase incl. Medline):***  **(**'enteric feeding'/**mj/**de OR 'parenteral nutrition'/**mj/**exp OR 'nutritional support'/**mj**/deOR (((enteric* OR enteral* OR tube* OR gastric* OR parenteral* OR support*) NEAR/3 (nutrition* OR feeding*))):ab,ti**) AND (**'child'/exp OR 'adolescent'/exp OR 'pediatrics'/exp OR 'pediatric hospital'/de OR 'pediatric intensive care unit'/de OR 'newborn intensive care'/de OR (child* OR infant* OR newborn* OR pediatr* OR paediatr* OR PICU*):ab,ti**) AND (**'pediatric intensive care unit'/de OR 'newborn intensive care'/de *OR 'intensive care'/de* OR 'intensive care unit'/de OR 'high risk population'/de OR 'critically ill patient'/de *OR 'intensive care nursing'/exp* OR (((intensive OR critical*) NEAR/3 (care OR ill*)) OR ICU OR PICU* OR 'high risk'):ab,ti**) AND (**'gastric residual volume'/de OR 'gastric retention'/de OR (((gastric*) NEAR/3 (residual* OR retent*))):ab,ti,kw**) NOT (**[animals]/lim NOT [humans]/lim**) NOT (**'Conference Abstract' OR 'Editorial'**)/it AND [**1997-2018]/py  ***Medline Epub (Ovid):***  **(**exp *"Nutritional Support"/OR (((enteric* OR enteral* OR tube* OR gastric* OR parenteral* OR support*) ADJ3 (nutrition* OR feeding*))).ab,ti.**) AND (**exp "Child"/ OR "Infant"/ OR "Infant, Newborn"/ OR "Adolescent"/ OR exp "Pediatrics"/ OR "Hospitals, Pediatric"/ OR exp "Intensive Care Units, Pediatric"/ OR "Intensive Care, Neonatal"/ OR (child* OR infant* OR newborn* OR pediatr* OR paediatr* OR PICU*).ab,ti.**) AND (**exp "Intensive Care Units"/ OR exp "Critical Care"/ OR "Critical Illness"/ *OR "Critical Care Nursing"/* OR (((intensive OR critical*) ADJ3 (care OR ill*)) OR ICU OR PICU* OR "high risk").ab,ti.**) AND (**(((gastric*) ADJ3 (residual* OR retent*))).ab,ti,kw.**) NOT (**exp animals/ NOT humans/**) NOT (**congresses OR editorial**)**.pt.  *Limits Publication Year: 1997-2018*  ***Cochrane Central (trials):*** *(1997-2018)*  **(**(((enteric* OR enteral* OR tube* OR gastric* OR parenteral* OR support*) NEAR/3 (nutrition* OR feeding*))):ab,ti**) AND (**(child* OR infant* OR newborn* OR pediatr* OR paediatr* OR PICU*):ab,ti**) AND *(****(((intensive OR critical*) NEAR/3 (care OR ill*)) OR ICU OR PICU* OR 'high risk'):ab,ti****)* AND (**(((gastric*) NEAR/3 (residual* OR retent*))):ab,ti,kw**)**  ***Web of Science:***  **TS=((**(((enteric* OR enteral* OR tube* OR gastric* OR parenteral* OR support*) NEAR/2 (nutrition* OR feeding*)))**) AND (**(child* OR infant* OR newborn* OR pediatr* OR paediatr* OR PICU*)**) AND *(****(((intensive OR critical*) NEAR/2 (care OR ill*)) OR ICU OR PICU* OR "high risk")****)* AND (**(((gastric*) NEAR/2 (residual* OR retent*))) **NOT** ((animal* OR rat OR rats OR pig* OR swine*) NOT (human* OR patient*))**)**) **AND** DT=Article  *Timespan: 1997-2018* |
| Question 13.  In critically ill children, do prokinetics impact on clinical outcomes? | ***Embase.com (Embase incl. Medline):***  **(**'enteric feeding'/**mj/**de OR 'parenteral nutrition'/**mj/**exp OR 'nutritional support'/**mj**/deOR (((enteric* OR enteral* OR tube* OR gastric* OR parenteral* OR support*) NEAR/3 (nutrition* OR feeding*))):ab,ti**) AND (**'child'/exp OR 'adolescent'/exp OR 'pediatrics'/exp OR 'pediatric hospital'/de OR 'pediatric intensive care unit'/de OR 'newborn intensive care'/de OR (child* OR infant* OR newborn* OR pediatr* OR paediatr* OR PICU*):ab,ti**) AND (**'pediatric intensive care unit'/de OR 'newborn intensive care'/de *OR 'intensive care'/de* OR 'intensive care unit'/de OR 'high risk population'/de OR 'critically ill patient'/de *OR 'intensive care nursing'/exp* OR (((intensive OR critical*) NEAR/3 (care OR ill*)) OR ICU OR PICU* OR 'high risk'):ab,ti**) AND (**'intestine contraction stimulating agent'/exp OR 'domperidone'/de OR 'erythromycin'/de OR 'motilin derivative'/exp OR (prokinetic* OR metoclopramide* OR domperidon* OR erythromycin* OR motilin* OR ((intestin* OR gastrointestin*) NEAR/3 (stimula*)) *OR lactulose* OR sorbitol* OR macrogol* OR glycerol* OR metoclopramide* OR cisapride* OR macrogol* OR laxative* OR 'magnesium sulfate'*):ab,ti**) NOT (**[animals]/lim NOT [humans]/lim**) NOT (**'Conference Abstract' OR 'Editorial'**)/**it **AND [**1997-2018]/py  ***Medline Epub (Ovid):***  **(**exp *"Nutritional Support"/OR (((enteric* OR enteral* OR tube* OR gastric* OR parenteral* OR support*) ADJ3 (nutrition* OR feeding*))).ab,ti.**) AND (**exp "Child"/ OR "Infant"/ OR "Infant, Newborn"/ OR "Adolescent"/ OR exp "Pediatrics"/ OR "Hospitals, Pediatric"/ OR exp "Intensive Care Units, Pediatric"/ OR "Intensive Care, Neonatal"/ OR (child* OR infant* OR newborn* OR pediatr* OR paediatr* OR PICU*).ab,ti.**) AND (**exp "Intensive Care Units"/ OR exp "Critical Care"/ OR "Critical Illness"/ *OR "Critical Care Nursing"/* OR (((intensive OR critical*) ADJ3 (care OR ill*)) OR ICU OR PICU* OR "high risk").ab,ti.**) AND (**"Domperidone"/ OR exp "Erythromycin"/ OR "Motilin"/ OR "Cisapride"/ OR (prokinetic* OR metoclopramide* OR domperidon* OR erythromycin* OR motilin* OR ((intestin* OR gastrointestin*) ADJ3 (stimula*)) *OR lactulose* OR sorbitol* OR macrogol* OR glycerol* OR metoclopramide* OR cisapride* OR macrogol* OR laxative* OR "magnesium sulfate"*).ab,ti.**) NOT (**exp animals/ NOT humans/**) NOT (**"congresses" OR "editorial"**).**pt.  *Limits Publication year: 1997-2018*  ***Cochrane Central (trials):*** *(1997-2018)*  **(**(((enteric* OR enteral* OR tube* OR gastric* OR parenteral* OR support*) NEAR/3 (nutrition* OR feeding*))):ab,ti**) AND (**(child* OR infant* OR newborn* OR pediatr* OR paediatr* OR PICU*):ab,ti**) AND (**(((intensive OR critical*) NEAR/3 (care OR ill*)) OR ICU OR PICU* OR 'high risk'):ab,ti**) AND (**(prokinetic* OR metoclopramide* OR domperidon* OR erythromycin* OR motilin* OR ((intestin* OR gastrointestin*) NEAR/3 (stimula*)) *OR lactulose* OR sorbitol* OR macrogol* OR glycerol* OR metoclopramide* OR cisapride* OR macrogol* OR laxative* OR 'magnesium sulfate'*):ab,ti**)**  ***Web of Science:***  **TS=((**(((enteric* OR enteral* OR tube* OR gastric* OR parenteral* OR support*) NEAR/2 (nutrition* OR feeding*)))**) AND (**(child* OR infant* OR newborn* OR pediatr* OR paediatr* OR PICU*)**) AND (**(((intensive OR critical*) NEAR/2 (care OR ill*)) OR ICU OR PICU* OR "high risk")**) AND (**(prokinetic* OR metoclopramide* OR domperidon* OR erythromycin* OR motilin* OR ((intestin* OR gastrointestin*) NEAR/2 (stimula*)) *OR lactulose* OR sorbitol* OR macrogol* OR glycerol* OR metoclopramide* OR cisapride* OR macrogol* OR laxative* OR "magnesium sulfate"*)**)** **NOT** ((animal* OR rat OR rats OR pig* OR swine*) NOT (human* OR patient*))) **AND DT=**Article  *From: 1997-2018* |
| Question 14.  In critically ill children, when should Parenteral Nutrition (PN) be started? | ***Embase.com (Embase incl. Medline):***  **(**'enteric feeding'/**mj/**de OR 'parenteral nutrition'/**mj/**exp OR 'nutritional support'/**mj**/deOR (((enteric* OR enteral* OR tube* OR gastric* OR parenteral* OR support*) NEAR/3 (nutrition* OR feeding*))):ab,ti**) AND (**'child'/exp OR 'adolescent'/exp OR 'pediatrics'/exp OR 'pediatric hospital'/de OR 'pediatric intensive care unit'/de OR 'newborn intensive care'/de OR (child* OR infant* OR newborn* OR pediatr* OR paediatr* OR PICU*):ab,ti**) AND (**'pediatric intensive care unit'/de OR 'newborn intensive care'/de *OR 'intensive care'/de* OR 'intensive care unit'/de OR 'high risk population'/de OR 'critically ill patient'/de *OR 'intensive care nursing'/exp* OR (((intensive OR critical*) NEAR/3 (care OR ill*)) OR ICU OR PICU* OR 'high risk'):ab,ti**) AND** ('protein metabolism'/exp OR 'protein requirement'/de OR 'protein'/de/mj OR 'amino acid'/de OR (((protein* OR 'amino acid' OR 'amino acids') NEAR/4 (optimal* OR high* OR low* OR requir* OR deliver* OR administ* OR intake* OR feeding* OR metabol* OR suppl* OR infusion* OR dos*))):ab,ti) **NOT (**[animals]/lim NOT [humans]/lim**) NOT (**'Conference Abstract' OR 'Editorial'**)/it AND [**1997-2018]/py  ***Medline Epub (Ovid):***  **(**exp *"Nutritional Support"/OR (((enteric* OR enteral* OR tube* OR gastric* OR parenteral* OR support*) ADJ3 (nutrition* OR feeding*))).ab,ti.**) AND (**exp "Child"/ OR "Infant"/ OR "Infant, Newborn"/ OR "Adolescent"/ OR exp "Pediatrics"/ OR "Hospitals, Pediatric"/ OR exp "Intensive Care Units, Pediatric"/ OR "Intensive Care, Neonatal"/ OR (child* OR infant* OR newborn* OR pediatr* OR paediatr* OR PICU*).ab,ti.**) AND (**exp "Intensive Care Units"/ OR exp "Critical Care"/ OR "Critical Illness"/ *OR "Critical Care Nursing"/* OR (((intensive OR critical*) ADJ3 (care OR ill*)) OR ICU OR PICU* OR "high risk").ab,ti.**) AND** ("Proteins"/ OR "Amino Acids"/ OR (((protein* OR "amino acid" OR "amino acids") ADJ4 (optimal* OR high* OR low* OR requir* OR deliver* OR administ* OR intake* OR feeding* OR metabol* OR suppl* OR infusion* OR dos*))).ab,ti.) **NOT (**exp animals/ NOT humans/**) NOT (**"congresses" OR "editorial"**).**pt.  *Limits Publication year: 1997-2018*  ***Cochrane Central (trials):***  **(**(((enteric* OR enteral* OR tube* OR gastric* OR parenteral* OR support*) NEAR/3 (nutrition* OR feeding*))):ab,ti**) AND (**(child* OR infant* OR newborn* OR pediatr* OR paediatr* OR PICU*):ab,ti**) AND (**(((intensive OR critical*) NEAR/3 (care OR ill*)) OR ICU OR PICU* OR 'high risk'):ab,ti**) AND** ((((protein* OR 'amino acid' OR 'amino acids') NEAR/4 (optimal* OR high* OR low* OR requir* OR deliver* OR administ* OR intake* OR feeding* OR metabol* OR suppl* OR infusion* OR dos*))):ab,ti)  *Selection 1997-2018 in EndNote*  ***Web of Science:***  **TS=((**(((enteric* OR enteral* OR tube* OR gastric* OR parenteral* OR support*) NEAR/2 (nutrition* OR feeding*)))**) AND (**(child* OR infant* OR newborn* OR pediatr* OR paediatr* OR PICU*)**) AND (**(((intensive OR critical*) NEAR/2 (care OR ill*)) OR ICU OR PICU* OR "high risk")**) AND** ((((protein* OR "amino acid" OR "amino acids") NEAR/3 (optimal* OR high* OR low* OR requir* OR deliver* OR administ* OR intake* OR feeding* OR metabol* OR suppl* OR infusion* OR dos*)))) **NOT** ((animal* OR rat OR rats OR pig* OR swine*) NOT (human* OR patient*))) **AND DT=**Article  *From: 1997-2018* |
| Question 15.  In critically ill children, does the use of a feeding protocols impact on clinical outcomes? | ***Embase.com (Embase incl. Medline),***  **(**'enteric feeding'/**mj/**de OR 'parenteral nutrition'/**mj/**exp OR 'nutritional support'/**mj**/deOR (((enteric* OR enteral* OR tube* OR gastric* OR parenteral* OR support*) NEAR/3 (nutrition* OR feeding*))):ab,ti**) AND (**'child'/exp OR 'adolescent'/exp OR 'pediatrics'/exp OR 'pediatric hospital'/de OR 'pediatric intensive care unit'/de OR 'newborn intensive care'/de OR (child* OR infant* OR newborn* OR pediatr* OR paediatr* OR PICU*):ab,ti**) AND (**'pediatric intensive care unit'/de OR 'newborn intensive care'/de *OR 'intensive care'/de* OR 'intensive care unit'/de OR 'high risk population'/de OR 'critically ill patient'/de *OR 'intensive care nursing'/exp* OR (((intensive OR critical*) NEAR/3 (care OR ill*)) OR ICU OR PICU* OR 'high risk'):ab,ti**) AND (**'practice guideline'/exp OR 'protocol compliance'/de OR (guideline* OR protocol*):ab,ti**) NOT (**[animals]/lim NOT [humans]/lim**) NOT (**'Conference Abstract' OR 'Editorial'**)/it AND [**1997-2018]/py  ***Medline Epub (Ovid):***  **(**exp *"Nutritional Support"/OR (((enteric* OR enteral* OR tube* OR gastric* OR parenteral* OR support*) ADJ3 (nutrition* OR feeding*))).ab,ti.**) AND (**exp "Child"/ OR "Infant"/ OR "Infant, Newborn"/ OR "Adolescent"/ OR exp "Pediatrics"/ OR "Hospitals, Pediatric"/ OR exp "Intensive Care Units, Pediatric"/ OR "Intensive Care, Neonatal"/ OR (child* OR infant* OR newborn* OR pediatr* OR paediatr* OR PICU*).ab,ti.**) AND (**exp "Intensive Care Units"/ OR exp "Critical Care"/ OR "Critical Illness"/ *OR "Critical Care Nursing"/* OR (((intensive OR critical*) ADJ3 (care OR ill*)) OR ICU OR PICU* OR "high risk").ab,ti.**) AND (**"Guideline Adherence"/ OR "Practice Guideline".pt. OR "Practice Guidelines as Topic"/ OR "Clinical Protocols"/ OR (guideline* OR protocol*).ab,ti.**) NOT (**exp animals/ NOT humans/**) NOT (**"congresses" OR "editorial"**)**.pt.  *Limits Publication year: 1997-2018*  ***Cochrane Central (trials):***  **(**(((enteric* OR enteral* OR tube* OR gastric* OR parenteral* OR support*) NEAR/3 (nutrition* OR feeding*))):ab,ti**) AND (**(child* OR infant* OR newborn* OR pediatr* OR paediatr* OR PICU*):ab,ti**) AND (**(((intensive OR critical*) NEAR/3 (care OR ill*)) OR ICU OR PICU* OR 'high risk'):ab,ti**) AND (**(guideline* OR protocol*):ab,ti**)**  *Selection 1997-2018 in EndNote*  ***Web of Science:***  **TS=((**(((enteric* OR enteral* OR tube* OR gastric* OR parenteral* OR support*) NEAR/2 (nutrition* OR feeding*)))**) AND (**(child* OR infant* OR newborn* OR pediatr* OR paediatr* OR PICU*)**) AND (**(((intensive OR critical*) NEAR/2 (care OR ill*)) OR ICU OR PICU* OR "high risk")**) AND (**(guideline* OR protocol*)**) NOT** ((animal* OR rat OR rats OR pig* OR swine*) NOT (human* OR patient*))) **AND DT=**Article  *From: 1997-2018* |
