# Supplementary material for: Nutritional support for children during critical illness: European Society of Pediatric and Neonatal Intensive Care (ESPNIC) metabolism, endocrine and nutrition section position statement and clinical recommendations
Source: Springer Nature journal article supplement (doi:10.1007/s00134-019-05922-5), 2020-02-20
Supplement: MOESM4 [file 17728412]

**Supplementary file 7: Assessment of bias of studies included in the meta-analyses**

**7a) Assessment of risk of bias in RCTs**

| Study: Author and year of publication | Appropriate Method of Randomization? | Appropriate Allocation Concealment? | Appropriate blinding of study participants (subjective outcomes)? | Appropriate blinding of study participants (Mortality outcome)? | Appropriate blinding outcome assessors (subjective outcome)? | Appropriate blinding outcome assessors (mortality outcome)? | Intention to Treat Analysis? | No Selective Reporting of outcomes? | Trial not stopped early? | Overall Risk of Bias |
| --- | --- | --- | --- | --- | --- | --- | --- | --- | --- | --- |
| **Meta analyses 2 and 3 comparing Pharmaconutrition and no Pharmaconutrition in critically ill children on Mortality and New Infections** | | | | | | | | | | |
| Jordan et al 2016 | Yes | Yes | Yes | Yes | Yes | Yes | Unclear | No | No | Low |
| Ong et al 2012 | Unclear | Yes | Yes | Yes | Yes | Yes | Unclear | No | Yes | Low |
| **Meta-analysis 4 and 5 comparing intermittent and continuous EN in critically ill children on Diarrhea and Vomiting** | | | | | | | | | | |
| Horn et al. 2003 | Yes | No | No | NA | No | Unclear | No | Yes | Yes | High |
| Fayazi et al. 2016 | Unclear | No | No | No | No | No | Unclear | Yes | Yes | High |
| **Meta-analysis 6 comparing gastric and post pyloric feeding in critically ill children on Aspiration** | | | | | | | | | | |
| Kamat et al. 2008 | Not done | No | Not possible | NA | No | NA | Unclear | Yes | Yes | High |
| Meert et al. 2016 | Not done | No | Not possible | NA | No | No | Unclear | Yes | No | High |

**7b) Assessment of risk of bias in observational studies**

| Study: Author and year of publication | Representativeness of the exposed cohort (i.e. similarity to such patients in real life) | Selection of the non-exposed cohort from same population? | Accurate ascertainment of exposure? | Demonstration that outcome of interest was not present at start of study | Comparability of cohorts on the basis of the design or analysis (did they adjust for any significant differences?) | Assessment of outcome accurate? | Was follow-up long enough for outcomes to occur? | Adequacy of follow up of cohorts? | Co-Interventions similar between groups? | Overall Risk of Bias |
| --- | --- | --- | --- | --- | --- | --- | --- | --- | --- | --- |
| **Meta-analysis 1 comparing EN and no EN in critically ill children on hemodynamic support on Mortality** | | | | | | | | | | |
| Wertheim et al. 2001 | No | Yes | Yes | Yes | No | Yes | Yes | Yes | Yes | High |
| Panchal et al. 2016 | Yes | Yes | Yes | Yes | Yes | Yes | Unclear | Unclear | Yes | High |
| **Meta analyses 7, 8 and 10 comparing feeding protocol use and no feeding protocol use in all critically ill children, in cardiac and general critically ill children on Mortality** | | | | | | | | | | |
| Ang et al. 2016 | Yes | Yes | Yes | Yes | Yes | Unclear | Yes | Yes | Yes | High |
| Carbenito et al. 2016 | Yes | Yes | Unclear | No | Unclear | Yes | Yes | Yes | Unclear | High |
| Del Castillo et al.2010 | Yes | Unclear | Unclear | No | Unclear | Unclear | Yes | Yes | No | High |
| Geukers et al. 2012 | Yes | Yes | Yes | No | Unclear | Yes | Unclear | Yes | No | High |
| Kaufmann et al.2015 | No | Yes | Yes | No | Unclear | Yes | Yes | Yes | No | High |
| **Meta-analysis 9 comparing feeding protocol use and no feeding protocol use in cardiac critically ill children on Necrotizing enterocolitis (NEC)** | | | | | | | | | | |
| Braudis et al. 2009 | Yes | Yes | Yes | No | Unclear | Yes | Yes | No | No | High |
| Kaufmann et al. 2015 | No | Yes | Yes | No | Unclear | Yes | Yes | Yes | No | High |
| Carbenito et al. 2016 | Yes | Yes | Unclear | No | Unclear | Yes | Yes | Yes | Unclear | High |
| Del Castillo et al.2010 | Yes | Unclear | Unclear | No | Unclear | Unclear | Yes | Yes | No | High |
