# Supplementary material for: Nutritional support for children during critical illness: European Society of Pediatric and Neonatal Intensive Care (ESPNIC) metabolism, endocrine and nutrition section position statement and clinical recommendations
Source: Springer Nature journal article supplement (doi:10.1007/s00134-019-05922-5), 2020-02-20
Supplement: MOESM6 [file 17728412]

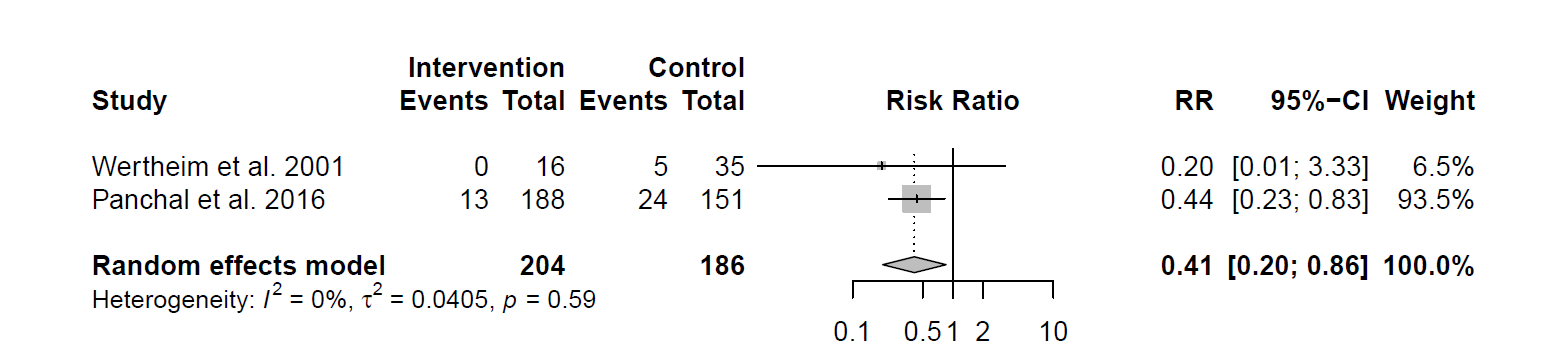


Favours no EN

Favours EN

**Meta-analysis 1** compares EN with no EN in critically ill children on hemodynamic support for mortality (observational studies)


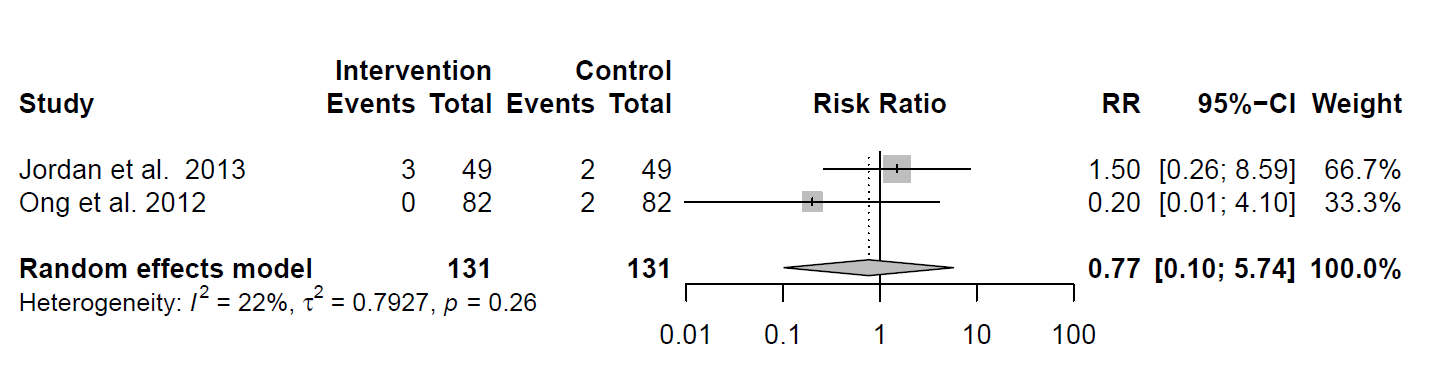


Favours no pharmaconutrition

Favours pharmaconutrition

**Meta-analysis 2** compares pharmaconutrition with no pharmaconutrition in critically ill children for mortality (randomised controlled trials)


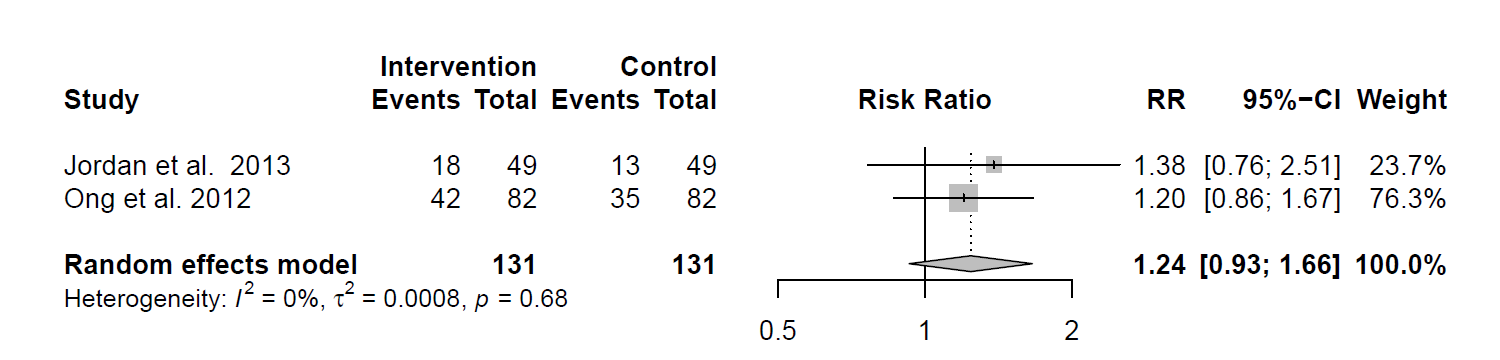


**
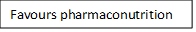

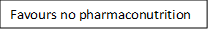
**

**Meta-analysis 3** compares pharmaconutrition with no pharmaconutrition in critically ill children for new infections (randomised controlled trials)


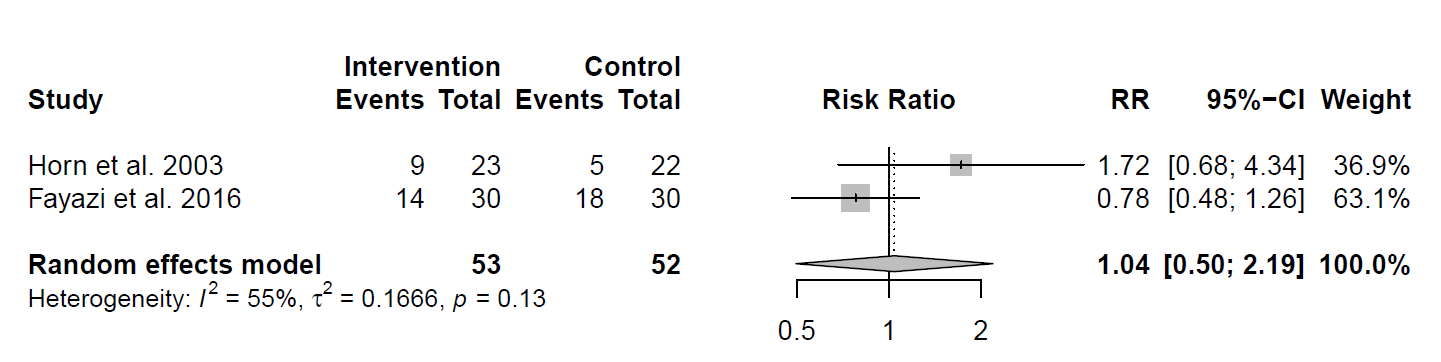


Favours continuous EN

Favours intermittent EN

**Meta-analysis 4** compares intermittent and continuous EN in critically ill children for diarrhea (randomised controlled trials)


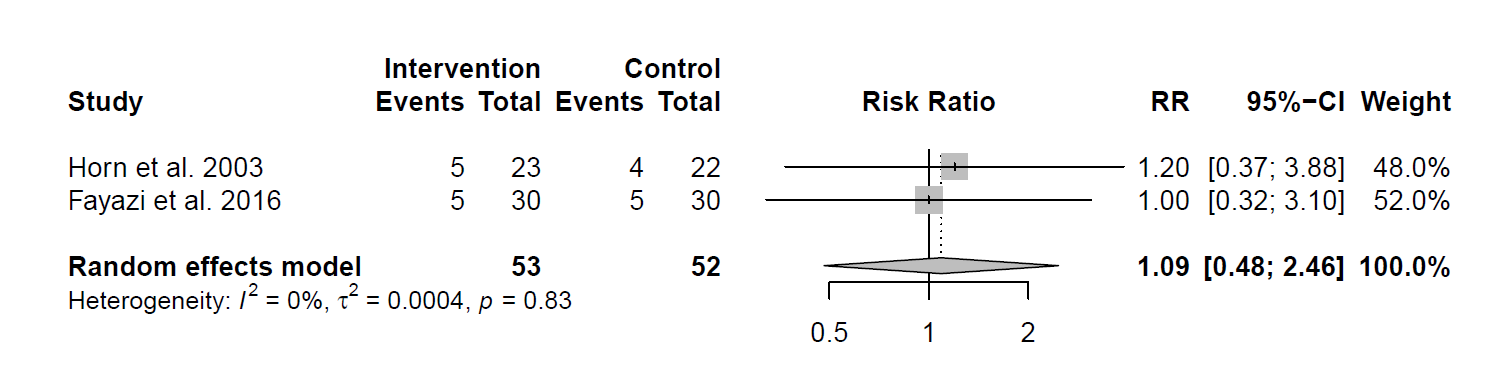


**
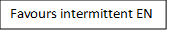

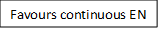
**

**Meta-analysis 5** compares intermittent and continuous EN in critically ill children for vomiting (randomised controlled trials)


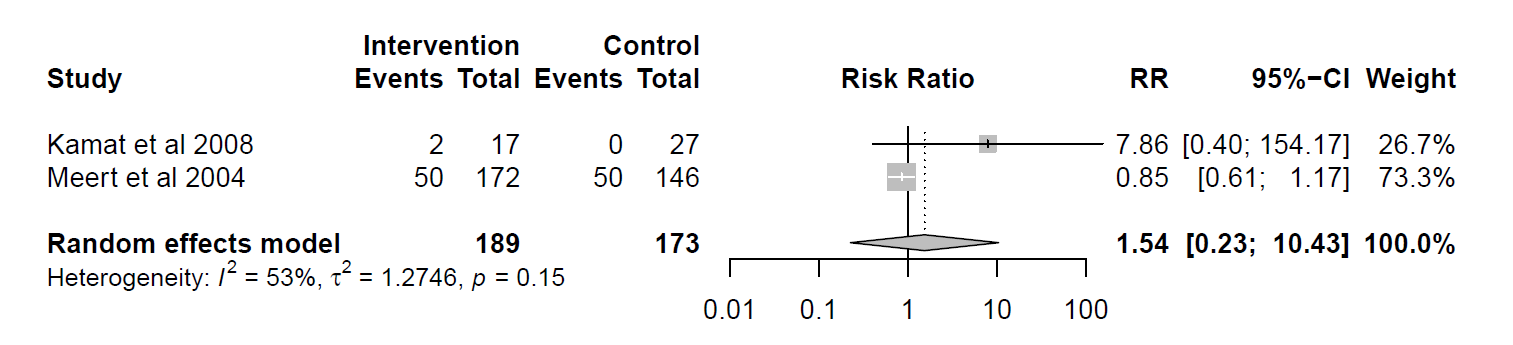


Favours gastric feeding

Favours post pyloric feeding

**Meta-analysis 6** compares gastric with post pyloric feeding in critically ill children for aspiration (randomised controlled trials)


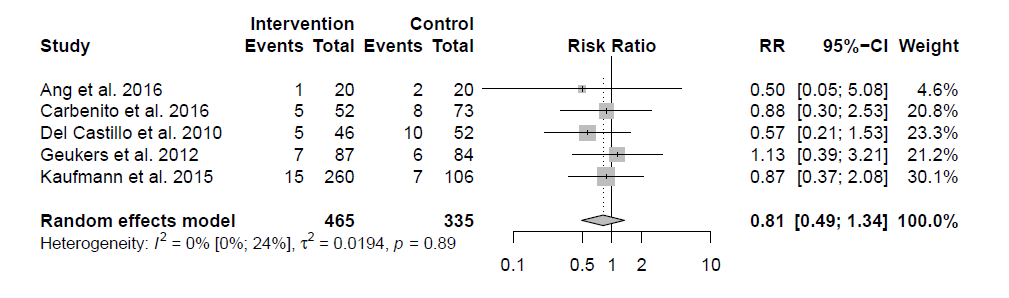


Favours no protocol

Favours protocol use

**Meta-analysis 7** compares feeding protocol use in ALL critically ill children combined (cardiac and general) on mortality (observational studies)


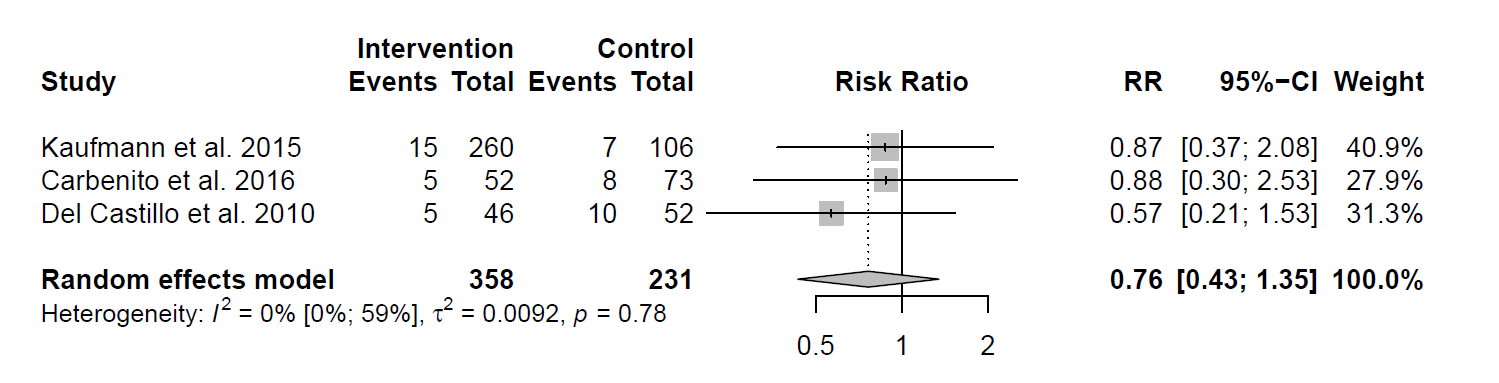


Favours no protocol

Favours protocol use

**Meta-analysis 8** compares feeding protocol use with no protocol in cardiac critically ill children on mortality (observational studies)


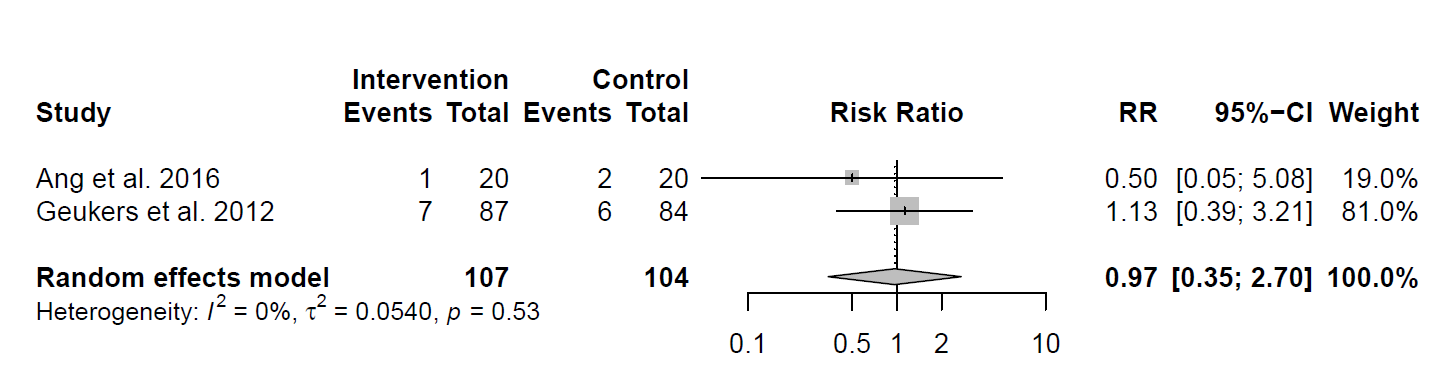


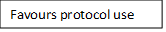

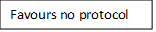


**Meta-analysis 9** compares feeding protocol use with no protocol in general critically ill children (no congenital heart disease) on mortality (observational studies)


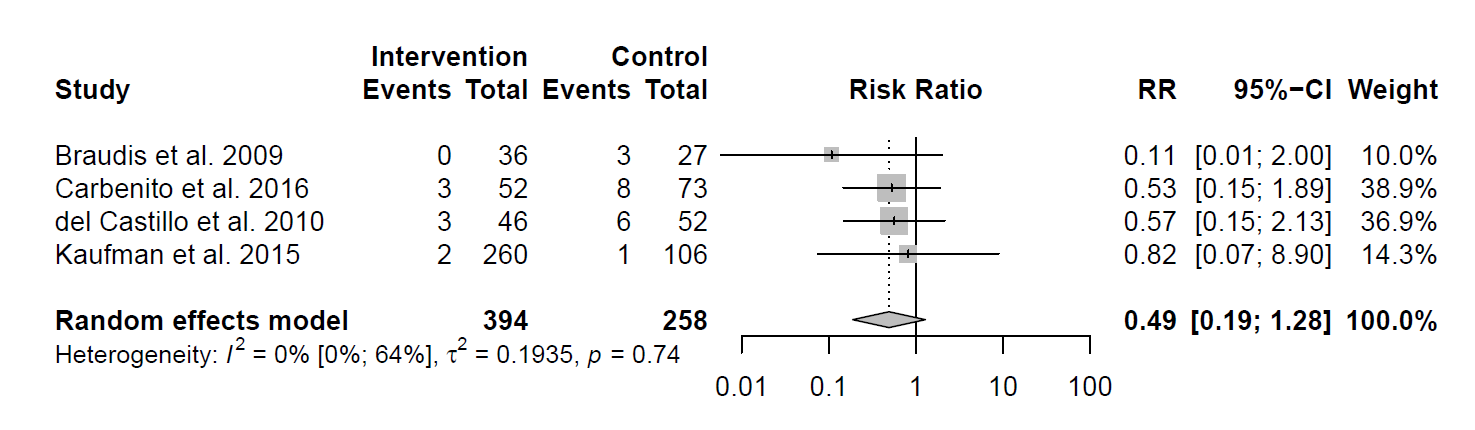


Favours no protocol

Favours protocol use

**Meta-analysis 10** compares feeding protocol, use with no protocol in cardiac critically ill children on Necrotising Enterocolitis (NEC) (observational studies)
