# Supplementary material for: Nutritional support for children during critical illness: European Society of Pediatric and Neonatal Intensive Care (ESPNIC) metabolism, endocrine and nutrition section position statement and clinical recommendations
Source: Springer Nature journal article supplement (doi:10.1007/s00134-019-05922-5), 2020-02-20
Supplement: MOESM8 [file 17728412]

**Supplementary file 8: SIGN evidence profile tables**

| **Question 1. In critically ill children, should nutritional status be assessed and what is the optimal method to assess nutritional status?** | | | | | | |
| --- | --- | --- | --- | --- | --- | --- |
| **Recommendation 1.1:** The assessment of nutritional status is recommended in critically ill children at admission and throughout their PICU admission (Strong consensus) SIGN Grade GCP | | | | | | |
| **Recommendation 1.2:** It is recommended to perform anthropometric measurements on admission and regularly during admission, and to express these measurements in z-scores, including weight, height/length mid upper arm circumference and head circumference in young children (Strong consensus) SIGN Grade GCP | | | | | | |
| **Study: Author and year of publication** | **Study examined** | **Study design** | **Patient population** | **Summary of results** | **Applicability to our question/patients** | **SIGN Level of evidence** |
| Wakita et al  20111 | To determine association between prognostic nutritional index with outcome in cardiac children | Retrospective  Observational | 36 critically ill children with congenital heart surgery | Prognostic nutritional index (cut-off point 55) was correlated with length of stay | Low | 2- |
| Vermilyea et al  20142 | To evaluate concordance between subjective global nutritional assessment (SGNA) and anthropometry and clinical outcome | Prospective Observational | 156 critically ill children | Length of stay, paediatric logistic organ dysfunction, and Paediatric Risk of Mortality III were not significantly correlated with SGNA | Moderate | 2+ |
| Valla et al  20153 | To determine the effect of a training program dedicated to nursing team on nutritional assessment | Before and after | 132 PICU health care professionals | Anthropometric measurements and nutritional status assessment were significantly more frequently performed after the training program | Moderate | 3 |
| Irving et al  20154 | To identify barriers to anthropometric measurements | Survey | 258 PICU health care professionals | Leading barriers were presence of medical devices, use of extracorporeal life support, and unstable hemodynamic status. | Moderate | 4 |
| Valla et al  20185 | To determine prevalence of undernutrition and faltering growth prior at PICU admission and their association with PICU outcome | Prospective Observational | 685 critically ill children | Faltering growth was diagnosed in 13.7% mostly in children with a normal BMI z-scores  Faltering growth was associated with increased PICU length of stay | High | 2+ |
| Grippa et al  20176 | To determine nutritional status on admission as a predictor of the duration of mechanical ventilation | Prospective  Observational | 72 critically ill children | Malnutrition was associated with increased duration of mechanical ventilation | High | 2+ |
| Sotoudeh et al  2016 7 | To determine malnutrition prevalence at PICU admission | Prospective  Observational | 69 critically ill children | 55.1% had malnutrition,23.2% were at risk, 15.9% had normal state, 5.8% had overweight. | High | 2- |
| Bechard et al  20168 | To determine association of nutritional status based on body mass index on PICU morbidity and mortality | Prospective Observational | 1622 critically ill children | Underweight (17.9%), normal weight (54.2%), overweight (14.5%), and obese (13.4%).  odds of 60-day mortality were higher in underweight children  odds of hospital-acquired infections were higher in underweight and obese children | High | 2++ |
| Anton-Martin et al  20169 | To determine the association of being underweight and in-hospital mortality in children requiring extracorporeal membrane oxygenation (ECMO) | Retrospective Observational | 491 critically ill children on ECMO | 24.4% were underweight, and 8.9% were obese.  Underweight status was associated with increased predicted odds of in-hospital mortality | High | 2- |
| Radman et al  201410 | To determine the association between preoperative nutritional status and postoperative outcomes in children undergoing surgery for congenital heart defects (CHD) | Prospective  Observational | 41 critically ill children  after congenital heart surgery | Lower preoperative nutritional status was associated with duration of any continuous inotropic support and myocardial stress (B-type natriuretic peptide [BNP]), length of PICU stay and duration ventilation | High | 2- |
| Prince et al  201411 | To determine whether weight-for-age at admission is an independent risk factor for mortality | Retrospective observational | 12458 critically ill children from paediatric, cardiac and neonatal intensive care | Weight-for-age at admission is an independent risk factor for mortality. A U-shaped association between weight and risk-adjusted mortality exists, with the lowest risk of death in children who are mild-to-moderately overweight. | High | 2+ |
| Leite et al  201312 | To determine association of hyperglycaemia and hypoglycaemia with mortality, length of intensive care unit (ICU) stay, and ventilator-free days in critically ill children while taking into account the nutrition status. | Prospective Observational | 221 critically ill children | 47.1% were malnourished  Compared with well-nourished, malnourished patients with hyperglycemia are at a greater risk of mortality, independent of clinical severity. Hypoglycaemia was shown to be associated with mortality, longer length of ICU stay, and fewer ventilator-free days only in malnourished patients. | Moderate | 2+ |
| Zamberlan et al  201213 | To determine nutritional status and the association on outcome in children after liver transplantation | Prospective Observational | 60 critically ill children  after liver transplantation | 50.0% undernutrition by height/age; 10.0-11.1% by weight/height or weight/length or body mass index/age; 61.6% by arm circumference/age and 51.0% by triceps skinfold/age  Negative correlation between arm circumference/age and length of hospitalization | High | 2+ |
| De Souza et al  201214 | To determine association of malnutrition on PICU outcome | Prospective Observational | 175 critically ill children | 45.5% were malnourished at admission  Malnutrition was associated with greater length of ventilation | High | 2+ |
| Castillo et al  201215 | To determine association between mortality and nutritional status of children receiving renal replacement therapy (CRRT) | Prospective observational | 174 critically ill children with renal replacement therapy | Malnutrition in children who require CRRT is associated with increased mortality | High | 2- |
| Numa et al  201116 | To determine association between admission weight percentile and risk-adjusted mortality in PICU | Retrospective observational | 6337 critically ill children from a paediatric and surgical neonatal intensive care unit | 21.5% of patients had weights not above the 3rd centile and 5.7% had weights on at least the 97th centile  Weight centile was associated with mortality, with the lowest mortality being associated with weights on the 75th centile and increasing symmetrically around this nadir. | High | 2- |
| Botran et al  201117 | To determine association between energy expenditure (EE), biochemical and anthropometric nutritional status and severity scales in critically ill children | Prospective Observational | 46 critically ill children | No association was found between nutritional status or clinical severity with energy expenditure | Moderate | 2- |
| Srinivasan et al  201018 | To determine association between obesity and mortality after in-hospital, paediatric cardiopulmonary resuscitation (CPR) | Prospective observational | 1268 critically ill children admitted after in-hospital cardiac arrest | Obesity was noted for 17% and underweight for 45%  Obesity was independently associated with worse odds of event survival and survival to hospital discharge | Moderate | 2+ |
| Anderson et al  200919 | To determine the association between nutritional status at the time of the bidirectional Glenn procedure on short-term outcomes | Retrospective Observational | 100 critically ill children after bidirectional Glenn surgery | A lower weight-for-age z score and younger age at the time of the bidirectional Glenn procedure was associated with increased length of hospital stay | High | 2+ |
| Eskedal et al  200820 | To determine association between impaired nutritional status and mortality in children after surgery for congenital heart defects | Retrospective observational | 74 cardiac critically ill children | The odds ratio for death was 13.5 (95% CI 3.6 to 51.0) in children with a decrease in weight z-score of 0.67 after the last surgery | High | 2- |
| Kelleher et al  200621 | To determine the risk for malnutrition in infants with hypoplastic left heart syndrome (HLHS) | Retrospective Observational | 50 cardiac critically ill children after Norwood or Blalock-Taussig shunt procedures | Increased length of stay (PICU and hospital), shorter duration of parenteral nutrition therapy, and higher diuretic dosage at discharge were associated with lower weight-for-age Z score at discharge | High | 2- |
| Hulst et al  200622 | To determine whether abnormal values of routine laboratory parameters at admission predict outcome and changes in anthropometric parameters in critically ill children | Prospective Observational | 105 critically ill children | Prevalence of hypomagnesemia, hypertriglyceridemia, uraemia and hypoalbuminemia were 20%, 25%, 30% and 52%, respectively, with no significant associations between the different disorders. Hypertriglyceridemia was associated with longer ventilator dependence and length of stay | High | 2+ |
| Hulst et al  200423 | To evaluate nutritional status from PICU admission up to 6 months after discharge | Prospective Observational | 93 critically ill children | Upon admission, 24% were undernourished. At 6 months after discharge almost all children showed complete recovery of nutritional status. | High | 2+ |
| Valla et al  2017 24 | To determine quadriceps femoris (QF) thickness evolution over PICU stay and intra and inter reproducibility of ultrasonography assessment of QF thickness | Prospective Observational | 17 critically ill children | Good intra and inter reproducibility  QF thickness monitoring showed significant decrease over time during PICU admission | High | 2+ |
| Fivez et al  2015 25 | To determine accuracy and reliability of ultrasound to measure quadriceps muscle thickness | Prospective Observational | 30 critically ill children | Intra-observer variability is too large with respect to the expected reduction in muscle thickness. | Low | 2+ |
| Briassoulis G et al 2001 26 | To evaluate a protocol of early enteral feeding on nutritional indices and its association with outcome | Prospective Observational | 71 critically ill children | On the first day of the study, 16.7% had depleted fat, 31% had depleted protein stores, and 7% were at risk for depletion of fat or protein stores | High | 2+ |
| Davis et al  2017 27 | To determine association between overweight and obesity and clinical outcome | Retrospective Observational | 1817 critically ill children | Being overweight or obese was associated with decreased need for intubation and inotropic support, but was neither protective nor a risk factor for mortality or duration of mechanical ventilation | High | 2- |
| Ross et al  2016 28 | To determine association between obesity and PICU mortality. | Retrospective Observational | 127607 critically ill children | Risk-adjusted PICU mortality significantly increases as weight-for-height/BMI increases into the overweight and obese ranges. | High | 2+ |
| Ward et al  2016 29 | To determine association between weight extremes and clinical outcome in paediatric ARDS | Retrospective observational | 331 critically ill children with ARDS | Obese children with indirect lung injury paediatric ARDS had a lower risk of mortality. Among survivors, the overweight with indirect lung injury required longer duration of mechanical ventilation. There was no mortality difference between body mass index groups with direct lung injury. | High | 2- |
| Goh et al  2013 30 | To determine association between overweight and obesity and PICU outcomes | Retrospective Observational | 1031 critically ill children | 75,3% normal weight, 13,7 overweight, 7,6 obese, and 6,4 severely obese.  Critically ill overweight, obese, and severely obese children who require invasive mechanical ventilation have similar mortality, length of stay in the PICU, and ventilator days as compared with normal-weight children. | High | 2- |

| **Question 2. In critically ill children, when should enteral nutrition be commenced and how should it be increased?** | | | | | | |
| --- | --- | --- | --- | --- | --- | --- |
| **Recommendation 2.1:**It is recommended to commence early enteral nutrition within 24 hours of admission unless contraindicated (Strong consensus) SIGN Grade D | | | | | | |
| **Recommendation 2.2:** It is recommended to increase enteral nutrition in a stepwise fashion until goal for delivery is achieved using a feeding protocol or guideline (Strong consensus) SIGN Grade D | | | | | | |
| **Author and year of publication** | **Study examined** | **Study design** | **Patient population** | **Results** | **Application to our question/patients** | **SIGN Level of evidence** |
| Abdul Manaf et al 2013 31 | To evaluate delivery of enteral nutrition to critically ill children | Prospective observational | 53 critically ill children | Enteral nutrition was initiated within 21.0 (interquartile range 5.3-33.8) hours after admission | Low | 2- |
| Ang et al 201632 | To determine effectiveness of a nurse-led, volume-based feeding protocol in PICU | Before and after Study | 40 critically ill children | Median time to feed initiation similar between groups (20 vs 21.5 hours)  No difference in median energy and protein intakes over 7-day period | Low | 2- |
| Braudis et al 2009 33 | To evaluate the safety and efficacy of an enteral feeding algorithm in infants with hypoplastic left heart syndrome post stage I palliation | Before and after study | 63 critically ill children with hypoplastic left heart syndrome | The median time to achieve recommended daily allowance of calories defined as 108 kcal/kg per day was significantly reduced in the study group (9 vs. 13 days; p 0.01). Despite the rapid advancement of enteral feedings on the algorithm, there was no incidence of NEC in the study group compared with 11% in the control group. | Moderate | 2- |
| Briassoulis et al 2001 26 | To evaluate a protocol of early enteral feeding on nutritional indices and its association with outcome | Prospective observational | 71 critically ill children | Malnutrition is associated with increased morbidity and mortality. | Low | 2- |
| Canarie et al 2015 34 | To determine risk factors associated with delayed enteral nutrition in critically ill children | Retrospective  observational | 444 critically ill children | Enteral nutrition was started at a median time of 20 hours after admission to the PICU. Risk factors associated with delayed enteral nutrition were non-invasive (odds ratio, 3.37; 95% CI, 1.69-6.72) and invasive positive-pressure ventilation (odds ratio, 2.06; 95% CI, 1.15-3.69), severity of illness (odds ratio for every 0.1 increase in paediatric index of mortality 2 score, 1.39; 95% CI, 1.14-1.71), procedures (odds ratio, 3.33; 95% CI, 1.67-6.64), and gastrointestinal disturbances (odds ratio, 2.05; 95% CI, 1.14-3.68) within 48 hours after admission to the PICU. | Low | 2- |
| Carpenito et al 2016 35 | To evaluate the impact of a standardized feeding protocol on the incidence of overall postoperative gastrointestinal morbidity after the hybrid procedure. | Retrospective before and after study | 73 critically ill children with HLHS | Pre-FP underwent hybrid procedure later than the post-FP (9.1 ± 5.8 vs. 5.7 ± 3.4 days, respectively, p<0.01) and achieved full enteral feeds earlier than the post-FP (3.2 +/- 2.9 vs. 7.8 +/-3.9 days, respectively, p<0.01). The incidence of necrotizing enterocolitis was higher in the pre- FP versus post-FP [11.0 % (8/65) vs. 5.8 % (3/49), respectively, p = 0.36]. | Moderate | 2- |
| Fayazi at al 2016 36 | To determine the effect of continuous feeding with intermittent feeding on the time needed to reach target intake | RCT | 60 critically ill children | Target calories goals were achieved more quickly in those being fed continuously compared to intermittent feeds | Moderate | 1- |
| Gurgueira et al 2005 37 | To evaluate the effect of the implementation of a Nutrition Support Team on PICU mortality | Before and after Study | 323 critically ill children | The implementation of an education program with the implementation of a nutrition support team increased the use of EN and decreased the use of PN and was associated with a reduced mortality rate. | Low | 2- |
| Hamilton et al 2014 38 | To evaluate the impact of implementing enteral nutrition (EN) algorithm on achieving optimal EN delivery in the Paediatric Intensive Care Unit (PICU) | Before and after study | 160 critically ill children | The implementation of an EN algorithm significantly improved EN delivery and decreased reliance on PN in critically ill children. Energy intake goal was reached earlier in a higher proportion of patients. | Moderate | 2- |
| Lee et al 2013 39 | To evaluate the incidence of delayed enteral nutrition (EN) and identify avoidable causes of delay | Retrospective observational | 200 critically ill children | More survivors than non-survivors received EN during their ICU stay (61.2% vs 30.0%, P=0.001) and received EN within 72 hr of ICU admission (19.8% vs 3.3%, P=0.033). The most common reason for delayed EN was gastrointestinal (GI) bleeding, followed by altered GI motility and hemodynamic instability. | Low | 2- |
| Malakouti et al 2012 40 | To evaluate nutritional support in severe paediatric traumatic brain injury patients (cases) and non-traumatic brain injury patients (controls) | Retrospective Observational | 193 critically ill children with traumatic brain injury | Nutrition was started 20 hrs (range 12–162) after paediatric intensive care unit admission. Fifty patients (52%) received nutrition within the first 48hrs, and 83 (82%) received nutrition support within the first 72 hrs. | Moderate | 2- |
| Mara et al 2014 41 | To evaluate exclusive EN provision practices and explored predictors of energy intake and delay of EN advancement | Prospective Observational | 130 critically ill children | The majority of the patients were fed via a nasogastric tube. Ninety-nine (76%) patients received EN support within 24 hours of admission to the PICU. Fasting (31%), fluid restriction (39%), procedures requiring feed cessation (22%) were the most common reasons why target energy requirements were not met. | Moderate | 2- |
| Meyer et al 2009 42 | To evaluate the impact of enteral feeding protocols on nutritional support practices through a continuous auditing process over 4 time periods | Prospective observational | 353 critically ill children | Over the study period the time taken to initiate EN reduced from 15 hours to 8 hrs, 5.5 and 4.5 hours by 2005.The number of patients on PN reduced from 11% (1997-8) to 4% in 2005. There was an increase in the energy target achievement by day 3 from 6% (1997-8) to 21%(2005) | Moderate | 2+ |
| Mikhailov et al 2014 43 | To determine association between early enteral nutrition (EEN), defined as the provision of 25% of goal calories enterally over the first 48 hours of admission, and mortality and morbidity | Retrospective Observational | 5105 critically ill children | EEN is associated with lower mortality in patients with PICU LOS of ≥96 hours (OR, 0.51; 95% CI, 0.34–0.76; P = 0.001). | Moderate | 2- |
| Mikhailov et al 2018 44 | To determine association of early enteral nutrition (EEN), defined as the provision of 25% of goal calories enterally over the first 48 hours of admission, with d paediatric intensive care unit (PICU) and hospital charges | Retrospective  Before and after study | 859 critically ill children | In critically ill children who stay in the PICU >96 hours, EEN is associated with significantly lower hospital charges. | Moderate | 2- |
| Petrillo-Albarano at al 2006 45 | To evaluate the effects of instituting a feeding protocol with inclusive bowel regimen on tolerance and time to accomplish goal feeding | Before and after Study | 91 critically ill children | The protocol group achieved goal nutrition in an average of 18.5 hrs and a median of 14 hrs. The retrospective group achieved goal feedings at an average of 57.8 hrs and a median of 32 hrs (p<.0001). Also noted were a reduction in the percentage of patients vomiting from 20% to 11% and a reduction in constipation from 51% to 33%. | Low | 2- |
| Tripathi et al 2015 46 | To determine association between enteral nutrition and outcome in critically ill children | Retrospective before and after | 165 critically ill children | Only 67% of the patients had feeding initiated within 48 hours of admission. No significant difference in mortality, hospital or PICU length of stay, or ventilator-free days was observed in patients who met one-third of their nutritional goals (50.3%) compared with patients who did not (49.7%). | Moderate | 2- |
| Yoshimura et al 2015 47 | To evaluate the safety and efficacy of a EN feeding protocol after paediatric cardiac surgery through comparison between a single-centre prospective case series and historical cases | Before and after study | 109 critically ill children | Implementation of the protocol was not associated with a different time of initiation EN or total calories provided, but the proportion of energy provided by PN was significantly smaller, and provided by EN was significantly larger after implementation | Moderate | 2- |
| Bagci et al 2017 48 | To evaluate single centre practice supplying EN and to identify factors that affect both the initiation of EN within 24 h and the adequate supply of EN in the first 48 h after PICU admission | Prospective Observational | 111 Critically ill children | Enteral feeding was initiated within 6 hours in 21%, 7 - 24 hours within 26.3% and 45.2% after 24 hours. Receiving more than 25% of energy expenditure within 48 hours, but not initiation of enteral feeds within 24 h was associated with decreased mortality. | Moderate | 2- |
| Balakrishnan et al 2017 49 | To evaluate single centre practice of initiation of enteral nutrition in children with traumatic brain injury and to evaluate the risk factors associated with delayed initiation of enteral nutrition | Retrospective Observational | 461 critically ill children with traumatic brain injury | Most patients (83%; range 69–88%) received EN within 48 h of PICU admission. A lower Glasgow Coma Scale scores and higher Injury Severity Score (ISS) were associated with delayed initiation of enteral nutrition. Delayed enteral nutrition was associated with poorer functional outcome at PICU discharge (p = 0.02) but not associated with mortality or increased length of stay. | Low | 2- |

| **Question 3. In critically ill children on hemodynamic support (vasoactive medications, extracorporeal life support ECLS) does enteral feeding compared to no enteral feeding affect outcomes?** | | | | | | |
| --- | --- | --- | --- | --- | --- | --- |
| **Recommendation 3.1:** Early enteral nutrition is recommended in term neonates who are stable on ECLS. (consensus) SIGN Grade D | | | | | | |
| **Recommendation 3.2:** Early enteral nutrition is recommended in children who are stable on ECLS (strong consensus) SIGN Grade D | | | | | | |
| **Recommendation 3.3:** Early enteral nutrition is recommended in term neonates who are stable on pharmaceutical hemodynamic support (consensus) SIGN Grade GCP | | | | | | |
| **Recommendation 3.4:** Early enteral nutrition is recommended in children who are stable on pharmaceutical hemodynamic support (strong consensus) SIGN Grade D | | | | | | |
| **Recommendation 3.5:** Early enteral nutrition is recommended in children after cardiac surgery (consensus) SIGN Grade C | | | | | | |
| **Author and year of publication** | **Study examined** | **Study design** | **Patient population** | **Results** | **Application to our question/patients** | **SIGN Level of evidence** |
| Hanekamp et al (2005) 50 | Evaluate gut hormonal responses to EN in critically ill newborns requiring veno-arterial extracorporeal membrane oxygenation (ECMO) | Prospective Observational | 32 critically ill neonates on ECMO | Intestinal hormone levels showed normal responses after introduction of enteral feeding, comparable with those in age-matched controls without ECMO | Moderate | 2- |
| Hanekamp et al (2005) 51 | Evaluate the feasibility and tolerance of a protocol of routine enteral nutrition in neonates requiring extracorporeal membrane oxygenation (ECMO) | Retrospective Observational | 67 critically ill neonates on ECMO | 54% reached 40% of fluid intake by enteral route on day 3  Few GI side effects (gastric distension, one aspiration, on discomfort), no stool bleeding, no bilious vomiting | High | 2- |
| Piena et al 1998 52 | To evaluate the intestinal mucosal integrity in neonatal ECMO patients | Prospective Observational | 16 critically ill neonates on ECMO | Intestinal integrity (measured with excretion percentages of lactulose/L-rhamnose, D-xylose, and 3-O-methyl-D-glucose) might be compromised in neonates on ECMO; introduction of enteral nutrition did not change these parameters. | High | 2- |
| Wertheim et al 2001 53 | To evaluate the association of EN and total PN on septic complications in neonates on extracorporeal membrane oxygenation (ECMO) | Retrospective Observational | 51 critically ill neonates on ECMO | Mortality and septic complications did not differ between neonates fed enterally or parenterally. | High | 2- |
| Ong et al 2018 54 | To evaluate the correlation between nutritional adequacy and mortality in children on ECLS | Retrospective Observational | 51 critically ill children on ECMO | Compared to survivors, non-survivors had lower adequacy of EN energy intake [0.5% (IQR 0-4.4) vs. 11.8% (IQR 0-24.5), p = 0.034]. | High | 2- |
| Pettignano et al 1998 55 | To compare adequacy, tolerance and complication of EN vs PN in ECMO paediatric population | Retrospective Observational | 27 critically ill children on ECMO | There was no difference between the two groups in the time needed to achieve caloric goal from the initiation of ECMO. No complications were associated with the utilization of enteral feedings. | High | 2- |
| King et al 2004 56 | To evaluate feeding tolerance in children receiving vasoactive drugs | Retrospective Observational | 52 critically ill children | 71% of interruption EN, only 29% for GI reason | High | 2- |
| Lopez-Herce et al 2008 57 | To evaluate characteristics of enteral nutrition and its tolerance in critically ill children with shock as compared with non-shock | Prospective observational | 65 critically ill children | The incidence of GI complications was higher (30.7% versus 21.8%) in the children with shock | High | 2- |
| Panchal et al 2016 58 | To evaluate the safety of enteral feeding in children receiving vasoactive agents | Retrospective Observational | 339 critically ill children | Enteral feeding in patients receiving VAs was not associated with difference in GI outcomes feeding intolerance, vomiting, diarrhoea, GI bleeding, NEC, abdominal distension, but less mortality | High | 2- |
| Braudis et al 2009 33 | To evaluate the safety and efficacy of an enteral feeding algorithm in infants with hypoplastic left heart syndrome post stage I palliation | Before and after study | 63 critically ill infants with HLHS | The median time to achieve recommended daily allowance of calories defined as 108 kcal/kg per day was significantly reduced in the study group (9 vs. 13 days; p 0.01). Despite the rapid advancement of enteral feedings on the algorithm, there was no incidence of NEC in the study group compared with 11% in the control group. | High | 2- |
| Del Castillo et al 2010 59 | To evaluate the impact of feeding protocol after surgery for HLHS on NEC and time to achieve nutritional goals | Before and after study | 98 critically ill infants with HLHS | Implementation of feeding protocol was associated with delayed initiation of EN (7.5 vs. 5.5 days, p < .001), and delayed achievement of full feeds (7 vs. 4 days, p = .02), but was associated with a lower incidence of NEC. | High | 2- |
| Iannuci et al 2013 60 | To evaluate incidence of necrotizing enterocolitis among term and near-term newborns with congenital heart disease, focusing on the relationship of enteral feeding to this complication | Retrospective Observational | 1551 critically ill neonates with heart disease | No difference in enteral feeding patterns among children who developed NEC and their matched controls | High | 2- |
| Jeffries et al 2006 61 | To evaluate GI complications after stage one palliation for HLHS | Retrospective Observational | 117 critically ill neonates | 41% of GI complications, 18% of NEC. More GI complication if VIS score is higher (multivariate analysis). No association with EN was reported | High | 2- |
| Luce et al 2011 62 | To evaluate the incidence of necrotizing enterocolitis (NEC) in neonates undergoing the Stage I hybrid procedure for palliation of complex congenital heart disease (CHD) | Retrospective Observational | 72 critically ill neonates | Incidence of NEC after hybrid procedure: 11%, EN was not found to be a risk factor | High | 2- |
| Manuri et al 2017 63 | To evaluate the incidence of necrotizing enterocolitis (NEC) after hybrid procedure in duct-dependent neonates | Retrospective Observational | 42 critically ill neonates | Feeding was started 6 hours after extubation according to a dedicated feeding protocol. None of the patients experienced any grade of necrotizing enterocolitis or major gastrointestinal adverse events. | High | 2- |
| Natarajan et al 2010 64 | To evaluate feeding patterns among neonates with CHD before and after surgical repair and determine the incidence of and to identify risk factors associated with feeding-related morbidities | Retrospective Observational | 67 critically ill neonates on vasoactive drugs | Postoperative enteral feeds were started 3 days (1-20) after surgery in 66 infants (98.5%) and intake of 100 ml/kg/day was reached in 64 infants at 5 postoperative days (1-29).  Age at which full feeds were obtained prior to surgery (p = 0.039) was associated with mortality | High | 2- |
| Sahu et al 2016 65 | To evaluate the feasibility and efficacy of enriched breast milk feed on postoperative recovery and growth of infants after open heart surgery | RCT | 50 critically ill children | Enriched breast milk is feasible but, as compared with standard breast milk, did not significantly affect mortality, LOS, duration of ventilation or infection rate. | high | 1- |
| Sanchez et al 2006 66 | To evaluate the utility of postpyloric enteral nutrition in the postoperative period of cardiac surgery in children | Prospective Observational | 350 critically ill children | The duration of the postpyloric feeding was 16 ± 23.8 days. Tolerance to nutrition was good and was not affected by the infusion of vasoactive drugs, sedatives, or muscle relaxants; 14.6% presented with gastrointestinal complications | Low | 2- |
| Typpo et al 2015 67 | To evaluate plasma biomarkers to reflect intestinal epithelial barrier function after cardiopulmonary bypass and in response to routine ICU care | Prospective Observational | 20 critically ill children | Severity of the illness is associated with decreased integrity and function of the intestinal barrier. | high | 2- |

| **Question 4. In critically ill term neonates with umbilical arterial catheters and/or PGE1 infusions, does enteral feeding impact on adverse events?** | | | | | | |
| --- | --- | --- | --- | --- | --- | --- |
| **Recommendation 4.1:** Enteral nutrition should be considered in term neonates with umbilical arterial catheters (strong consensus) SIGN Grade D | | | | | | |
| **Recommendation 4.2:** Enteral nutrition should be considered in critically ill term neonates on PGE1 infusion if managed in a critical care unit with adequate observation and monitoring (strong consensus) SIGN Grade D | | | | | | |
| **Author and year of publication** | **Study examined** | **Study design** | **Patient population** | **Results** | **Application to our question/patients** | **Level of evidence** |
| Willis et al 2008 68 | To assess enteral feeding tolerance in infants with CHD on PGE1 being fed | Retrospective Observational | 34 critically ill infants on PGE-1 | 97% 33/34 met their criteria for feed tolerance on PGE1 | High | 2- |
| Lucron et al 2005 69 | To assess the tolerance of PGE1 in infants with CHD | Retrospective Observational | 62 critically ill infants on PGE-1 | NEC occurred in 6.5% feed intolerance higher in low birth weight (p=0.4) infants. | Moderate | 2- |
| Becker et al 2015  70 | To determine the association between NEC and enteral feeding in infants with CHD on PGE1 | Retrospective Observational | 6710 infants with on PGE1 | NEC occurrence 0.3% of whom 57% were <37 weeks GA  No difference between NEC on EF or not (p=0.27) | High | 2+ |
| Havranek et al 2015 71 | To determine the effect of PDA on mesenteric blood flow and feeding tolerance in ELBW infants | Prospective Observational | 38 ELBW infants with PDAs | Higher rates of NEC in the large PDA group (n=9) | Low | 2- |
| Davey et al 1994 72 | To determine the difference in feeding problems and NEC in preterm infants who received early EN with a low UAC in situ to those who were fed 24 hours after the UAC was removed | RCT | 29 preterm infants | GRV and abdominal distention rates the same in both groups; No difference in NEC and infants in early EN group received PN for a median of 16 days less than the late group. | Low | 1- |

| **Question 5. In critically ill children what are their energy requirements?** | | | | | | |
| --- | --- | --- | --- | --- | --- | --- |
| **Recommendation 5.1:** In the acute phase, energy intake provided to critically ill children should not exceed resting energy expenditure (strong consensus) SIGN Grade C | | | | | | |
| **Recommendation 5.2:** After the acute phase, energy intake provided to critically ill children should account for energy debt, physical activity, rehabilitation and growth (strong consensus) SIGN Grade GCP | | | | | | |
| **Author and year of publication** | **Study examined** | **Study design** | **Patient population** | **Results** | **Application to our question/patients** | **Level of evidence** |
| Larsen et al 2018 73 | To determine the incidence of over- and under-feeding and to compare hospital outcomes between these feeding categories | Retrospective  Observational | 139 critically ill children | Being overfed (>110% MREE) was associated with increased PICU LOS. Being underfed (<90% MREE) was associated with shorter duration of ventilation and PICU LOS. | Moderate | 2- |
| Fivez et al 2016 74 | To determine whether withholding PN during the first week in PICU (LPN) is clinically superior to early (supplemental) PN initiation (EPN) | RCT | 1440 critically ill children | Energy intake in the EPN group reached approximately 50 kcal/kg/day on day 2 and 75 kcal/kg/ day on day 5. In the LPN group, energy intake was 20 and 40 kcal/kg/day, respectively.  LPN did not affect mortality but decreased the risk of a new infection (10.7% vs 18.5%; Odds ratio 0.48), decreased mean PICU stay from 9.2 days to 6.5 days, decreased the hospital LOS, and decreased the duration of ventilatory support. | High | 1+ |
| Jotterand Chaparro et al 2016 75 | To determine how much protein and energy are needed to equilibrate nitrogen and energy balances in ventilated critically ill children | Prospective Observational | 74 critically ill children | The energy intake required to achieve nitrogen equilibrium was 58 (95%CI: 53, 63) kcal/kg/d in the entire group. For the different age groups, it was: 54 (95% CI: 40, 69) kcal/kg/d in the 0-6 month olds, 66 (95% CI: 55, 87) kcal/kg/d in the 7-12 month olds, 56 (95% CI: 50,63) kcal/kg/d in the 1-3 year olds and 56 (95% CI: 49, 75) kcal/kg/d in the 4-8 year olds. | Moderate | 2- |
| Mikhailov et al 2014 43 | To determine association between early enteral nutrition (EEN), defined as the provision of 25% of goal calories enterally over the first 48 hours of admission, and mortality and morbidity | Retrospective Observational | 5105 critically ill children | EEN is associated with lower mortality in patients with PICU LOS of ≥96 hours (OR, 0.51; 95% CI, 0.34–0.76; P = 0.001). | Low | 2- |
| Dylewksi, et al 2013 76 | To determine the safety and efficacy of a standardized protein-sparing parenteral nutrition protocol in which glucose infusion was limited to 5–7 mg/kg/hour. | Retrospective Observational | 105 critically ill children with burns ≥ 30% total body surface area | 91% of patients received continuous PN or a combination of PN and EN and nine patients received only EN.  Protein intake was significantly higher in the PN group (2.5±2.7 g/kg/d vs 1.5±1.5 g/kg/d).  43% of PN patients required insulin therapy and 11% progressed to IV insulin.  The PN group had a significantly higher incidence of inhalation injury, pneumonia, more ventilator and central venous catheter days, and a longer PICU stay. The number of patients who acquired catheter-related blood infections did not differ between groups. | Low | 2- |
| Bechard et al 2012 77 | To examine the inﬂuence of protein and energy intake on protein balance in children receiving mechanical ventilation. | Systematic review | 9 trials including 347 critically ill children | Positive protein balance was achieved only in those patients with protein intake > 1.5 g/kg/day and energy intake > 57 kcal/kg/day. | High | 2++ |
| Mehta et al 2012 78 | To examine the variables associated with achieving optimal enteral nutrient intake and explore the relationship between adequacy of energy intake and clinical outcomes | Prospective Observational | 500 critically ill children | Mean prescribed goals for daily energy and protein intake were 64 kcals/kg and 1.7 g/kg respectively.  When compared with patients with energy intake from EN <33.3% of prescribed, mortality was significantly lower in the group with energy intake 33.3%–66.6% prescribed (OR 0.27 [0.11, 0.67]) and in those with energy intake > 66.7% prescribed (OR 0.14 [0.03, 0.61]) (p = .002). | High | 2- |
| de Betue et al 2011 79 | To investigate the efficacy of a protein-energy–enriched enteral formulas compared with that of a standard infant formula on protein balance | RCT | 18 critically ill infants | Higher enteral- protein-energy intake (3.1±0.3 g/kg/day and 119±25 kcal/kg/day vs standard intake 1.7±0.2 g/kg/day, 84±15 kcal/ kg/day; resulted in an increased protein balance (0.73±0.5 vs 0.02±0.6 g/kg/24 h). | Low | 1- |
| van Waardenburg et al 2009 80 | To compare the nutritional effects (nutrient delivery, energy and nitrogen balances, and plasma amino acid proﬁles) of a protein and energy-enriched infant formula (PE-formula) with a standard infant  formula (S-formula) | RCT | 18 critically ill infants | Energy intake on day 5: PE, 112 ± 13 kcal/kg/d and S, 82 ± 4 kcal/kg/d.  The daily nitrogen balances on days 2–5 were signiﬁcantly higher in the PE (P < 0.05) as was the  cumulative nitrogen balance (P < 0.01).  Higher plasma essential and branched chain amino acids in the PE. | Low | 1- |
| Briassoulis et al 2002 81 | To determine if early achievement of energy and protein balance improved nitrogen balance and somatic protein status during post-stress catabolic illness in children. | Prospective Observational | 71 critically ill children | Energy intake was 22 ± 1.1 kcal/kg/d on day 1 and 66 ± 2.7 kcal/kg/d on day 5 (p<.0001)  None of the patients had positive NB on day 1, and 62% had positive NB on day 5. | Low | 2- |
| Coss-Bu et al 2001 82 | To analyse the relation between a patient’s metabolic state and their nutritional intake, substrate utilization, and nitrogen balance in a population of critically ill children receiving total parenteral nutrition | Prospective Observational | 33 critically ill children | The energy and protein intakes were respectively 60 ± 33 kcal/kg/d and 2.1 ± 1.0 g/kg/d. Patients with a positive nitrogen balance had significantly higher protein intake (2.8 ± 0.9 g/kg/d vs 1.7 ± 0.7 g/kg/d)  Nitrogen Balance positively correlated with energy intake and REE (r = 0.51, p < 0.005) and negatively correlated with protein oxidation (r = -0.72, p < 0.0001) | Moderate | 2- |
| Joosten et al 1999 83 | To determine the value of indirect calorimetry combined with nitrogen balance in order to evaluate the current feeding protocols of mechanically ventilated children | Prospective Observational | 36 critically ill children | Energy and protein intake were respectively 62 ± 29 kcal/kg/d and 1.62 ± 1.2 g/kg/d.  NB positively correlated with energy intake and REE (r = 0.69, p < 0.0001).  Energy and protein intake were higher with NB (p <0.001) | Moderate | 2- |
| Coss-Bu et al 1998 84 | To investigate how age, severity of illness, and mechanical ventilation are related to REE and nitrogen balance in critically ill children. | Prospective Observational | 19 critically ill children | Energy and protein intake were respectively 49 ± 22 kcal/kg/d and 1.74 ± 0.78 g/kg/d.  NB balance was positively correlated with total caloric intake (r = 0.74, P < 0.001) and negatively with age (r = - 0.62, p < 0.005). | Moderate | 2- |

| **Question 6. In critically ill children, what is the most accurate method of determining or predicting energy expenditure?** | | | | | | |
| --- | --- | --- | --- | --- | --- | --- |
| **Recommendation 6.1:** Measuring resting energy expenditure using a validated indirect calorimeter should be considered to guide nutritional support in critically ill infants and children after the acute phase (strong consensus) SIGN Grade GCP | | | | | | |
| **Recommendation 6.2:** Schofield equation (for age and gender and using an accurate weight) is recommended to estimate resting energy expenditure (strong consensus) SIGN Grade C | | | | | | |
| **Author and year of publication** | **Study examined** | **Study design** | **Patient population** | **Results** | **Application to our question/patients** | **Level of evidence** |
| Jotterand Chaparro et al 2018 85 | To assess predictive equations of REE in critically ill children | Systematic review | 22 studies with 1102 children and assessing 21 predictive equations | No equation predicted REE within ±10% of MEE in >50% of observations. The Harris–Benedict equation overestimated REE in two thirds of patients. The least inaccurate equations were the Schofield equations and Talbot tables that predicted REE within ±15% of MEE in approximately 50% of observations. | High | 2++ |
| Jotterand Chaparro et al 2016 75 | To determine how much protein and energy are needed to equilibrate nitrogen and energy balances in ventilated critically ill children | Prospective Observational | 75 critically ill children | The energy intake required to achieve nitrogen equilibrium was 58 (95%CI: 53, 63) kcal/kg/d in the entire group.  For the different age groups, it was: 54 (95% CI: 40, 69) kcal/kg/d in the 0-6 month olds, 66 (95% CI: 55, 87) kcal/kg/d in the 7-12 month olds, 56 (95% CI: 50,63) kcal/kg/d in the 1-3 year olds and 56 (95% CI: 49, 75) kcal/kg/d in the 4-8 year olds. | High | 2- |
| Mehta et al 2015 86 | To examine the accuracy of a simplified equation for predicting REE using carbon dioxide elimination values | Prospective Observational | 72 critically ill children | The mean bias (limits of agreement) for the REE predicted by this new equation was -0.65% (-14.4.4-+13.1%). Mean bias (limits) of the agreement between measured and Schofield equation estimated REE was  -0.1% (-40.5%- +40.7%). | High | 2- |
| Mtaweh et al 2014 87 | To evaluate energy expenditure in a cohort of children with severe traumatic brain injury | Prospective Observational | 13 critically ill children with traumatic brain injury | When MEE was compared to predicted REE as determined by the Schofield equation, the mean was 69 ± 4.5%, with only 3 measurements greater than expected by this equation. | Moderate | 2- |
| Meyer et al 2012 88 | To develop a new predictive equation to estimate energy requirements for critically ill children | Prospective Observational | 30 critically ill children | The Schofield equation had the lowest standard deviation (136.8 kcal/d) and the White equation performed the worst. | High | 2- |
| De Wit et al 2010 89 | To determine pre- and postoperative predictors of energy expenditure in children with congenital heart disease requiring open heart surgery; and to compare measured resting energy expenditure with current predictive equations. | Prospective Observational | 21 critically ill children after congenital heart surgery | There was a significant difference between measured energy expenditure and Schofield (p < .006), World Health Organization (p < .002), and White paediatric intensive care unit-specific formula (p < .0001). The mean difference was 21%, 23% and 37%, respectively. | Moderate | 2- |
| Sy et al 2008 90 | To compare rates of EE based on bicarbonate kinetics and EEqCO2 with the actual intakes received by critically ill children, and EE calculated with the use of the WHO and Schofield equations | Prospective Observational | 31 critically ill children | The Schofield equations and the WHO equations overestimated the energy requirements of critically ill children by 42% and 67%, respectively, in both the enteral and glucose-electrolytes groups.  There was no significant difference between the estimates obtained by bicarbonate kinetics and the Schofield equations | Low | 2- |
| Framson et al 2007 91 | To compare the accuracy of a newly derived prediction equation speciﬁc to the paediatric intensive care unit and the measured resting energy expenditure | Prospective Observational | 44 critically ill children | MEE was 841±645 kcals/d. The Schoﬁeld equation estimate was 798±595 kcals/d and the White equation estimate was 815±564 kcals/d.  45% of measured resting energy expenditure measurements were within 90% to 110% of that predicted by the Schoﬁeld equation. The White equation was inaccurate, not within 10% of measured REE in 70% of measurements. | Moderate | 2- |
| López-Herce Cid et al 2007 92 | To study energy expenditure in critically ill infants and children and its correlation with clinical characteristics, treatment, nutrition, caloric intake, and predicted energy expenditure calculated through theoretical formulas | Prospective Observational | 43 critically ill children | In a high percentage of patients, predictive equations did not accurately estimate EE. | Moderate | 2- |
| Havalad et al 2006 93 | To compare measured REE with estimated REE using the Harris-Benedict, WHO, Schofield, and White equations in critically ill children with severe head injury and to evaluate the accuracy of these estimates. | Prospective Observational | 30 critically ill children with traumatic brain injury | There was poor agreement between the MREE and estimated REE using all 4 equations. Less than half of the estimated REEs were within 10% of the MREE.  The mean bias was 40.3 kcal/d (Harris-Benedict), -28 kcal/d (WHO), -11.73 (Schofield) and 50.2 kcal/d (White). | Moderate | 2- |
| Van der Kuip et al 2004 94 | To assess validity and reliability of two short, daily Douglas bag measurements, in comparison with a standard, 2-h measurement protocol with a metabolic monitor and to compare measured energy expenditure with predicted energy expenditure according to Schoﬁeld’s equations. | Prospective Observational | 14 critically ill children | The limits of agreement between measured and predicted energy expenditure (Schoﬁeld) were 2 times wider than the comparison between the metabolic monitor and Douglas bag: -37% to +22%  for the metabolic monitor versus Schoﬁeld expenditure and -37% to +26% for Douglas bag versus Schoﬁeld. | Moderate | 2- |
| Vazquez Martinez et al 2004 95 | To compare the accuracy of available equations to assess nutritional demands in ventilated, critically ill children during the ﬁrst 24 hrs of paediatric ICU admission and to contrast the accuracy of predictive formulas with indirect calorimetry measurements for predicting energy expenditure during the early post injury period. | Prospective Observational | 43 critically ill children | Statistically signiﬁcant differences were found between MEE and PEE using all predictive methods except for the Caldwell-Kennedy and Fleisch equations (either with actual or ideal weight). | Moderate | 2- |
| Taylor et al 2003 96 | To determine whether critically ill children were hypermetabolic and whether current predictive equations are appropriate to use in the PICU. | Prospective Observational | 57 critically ill children | REE was signiﬁcantly lower than those calculated by the Schoﬁeld and Fleisch equations (42.7 [26.9–65.4] and 42.8 [20.9–66.2] kcal/kg/day, respectively; p <0.001) and signiﬁcantly higher than the PICU-speciﬁc equation (26.2 [8.5–70.1] kcal/kg/day, p <0.0001). | Moderate | 2- |
| Hardy et al 2002 97 | To assess the degree to which the estimates of REE obtained using the prediction methods might provide accurate and acceptable estimates of energy requirements in sick children. | Prospective Observational | 52 critically ill children | The pREE fell within 10% of mREE most frequently (in 40% of patients) using Talbot’s tables. All other equations predicted within 10% of mREE in even fewer patients. | Moderate | 2- |
| White et al 2000 98 | To evaluate the use of current methods of predicting energy requirements and to develop and validate equations derived from actual energy expenditure measurements of 100 ventilated, critically ill children. | Prospective Observational | 100 critically ill children | No signiﬁcant difference was found between the measured energy expenditure and energy expenditure predicted by equations 1 and 2. A signiﬁcant difference was found between measured energy expenditure and energy expenditure predicted by the Schoﬁeld equations and the Talbot tables. The mean bias was reduced in equations 1 and 2 compared with the other predictive methods; however, the energy expenditure predicted by the Talbot tables had less variability and range of bias. | High | 2- |
| Briassoulis et al 2000 99 | To measure energy expenditure in critically ill children and compare it with the energy expenditure predicted by recommended formulas and relate the measured energy expenditure to nutritional and clinical indices. | Prospective Observational | 37 critically ill children | MEE was significantly lower than PBMR as estimated by all equations (the Schofield, the FAO/WHO/UNU and the Harris-Benedict equations) except the Talbot equations. | Moderate | 2- |
| Verhoeven et al 1998 100 | To perform measurements of energy expenditure which represents total daily energy expenditure in mechanically ventilated children,  in order to get a better insight into actual energy requirements and to compare these measurements with  the pBMR, energy intake, and nitrogen balance. | Prospective Observational | 30 critically ill children | A Bland–Altman plot for mTEE and pBMR shows a wide scatter around the mean (difference from the mean: - 2120 to 1970 kJ/day) | Moderate | 2- |
| Coss-Bu et al 1998 84 | To evaluate the use of two well-known predictive equations, corrected for stress factors of 1.5 and 1.3, in the calculation of REE in mechanically ventilated pediatric patients and to compare the values obtained with measured indirect calorimetry values by using methods comparison analysis as described by Bland and Altman | Prospective Observational | 55 critically ill children | The Harris-Benedict equation corrected for a stress factor of 1.5 and 1.3 overestimated REE.  The Talbot table overestimated REE with a stress factor of 1.5 and underestimated REE with a stress factor of 1.3. | Moderate | 2- |

| **Question 7: In critically ill children, what are the macronutrient requirements?** | | | | | | |
| --- | --- | --- | --- | --- | --- | --- |
| **7.1 What is the recommended glucose intake?** | | | | | | |
| **Recommendation 7.1:** Parenteral glucose provision should be sufficient to avoid hypoglycemia but not excessive to prevent hyperglycemia (strong consensus) SIGN grade D | | | | | | |
| **Author and year of publication** | **Study examined** | **Study design** | **Patient population** | **Results** | **Application to our question/patients** | **Level of evidence** |
| Verbruggen et al. 2011 101 | Determine whether 2.5 mg/kg/min versus 5.0 mg/kg/min parenteral glucose intake in infants post cranial surgery safely reduces the risk of hyperglycemia | Crossover RCT | 8 critically ill infants | 2.5 mg/kg/min versus 5.0 mg/kg/min safely reduced incidence of high glucose levels without causing hypoglycemia or affecting protein metabolism | Moderate | 1- |
| De Betue et al. 2012 102 | Determine whether 2.5 mg/kg/min versus 5.0 mg/kg/min parenteral glucose intake in infants post cardiac surgery safely reduces the risk of hyperglycemia | Crossover RCT | 11 critically ill infants | 2.5 mg/kg/min versus 5.0 mg/kg/min safely reduced incidence of high glucose levels without causing hypoglycemia or affecting protein metabolism | Moderate | 1- |
| **7.2 What is the recommended lipid intake?** | | | | | | |
| **Recommendation 7.2:** When parenteral nutrition is used, composite lipid emulsions, with or without fish oil, should be considered as the first-choice treatment (consensus) SIGN recommendation Grade GCP | | | | | | |
| Larsen et al 2012 103 | To compare two different lipid emulsion (lipoplus® and intralipid) pre surgery on inflammatory profile after cardiac surgery | RCT | 32 critically ill children | Combined lipid emulsion decreased the level of TNFα, but no difference was found in the incidence of sepsis, LOS in PICU or hospital, or time to sternal closure | Low | 1- |
| **7.3 What is the recommended protein/amino acid intake?** | | | | | | |
| **Recommendation 7.3a:** For critically ill infants and children on enteral nutrition a minimum enteral protein intake of 1.5 g/kg/d can be considered to avoid negative protein balance (consensus) SIGN grade B | | | | | | |
| **Recommendation 7.3b:** There is insufficient evidence available to support the use of additional protein/amino acid intake during the acute phase of illness (consensus) SIGN grade D | | | | | | |
| Hauschild et al 2019 104 | To examine the difference in protein delivery and nitrogen balance in critically ill patients eligible for EN who were prescribed enteral modular protein supplementation vs controls, and to assess the feasibility, safety and tolerance | RCT | 25 critically ill children | Protein supplementation resulted in higher protein intake (1.31 g/kg/day [1.17; 1.41]; 1.39 [1.28; 1.73] than in controls (0.83 g/kg/day [0.15; 1.21]). No concerns regarding safety and tolerance.  Not possible to compare nitrogen balance | Low | 1- |
| Kyle et al 2017 105 | To evaluate the effect of protein feeding on the resolution of acute kidney injury (AKI) | Retrospective Observational | 520 critically ill children | No association was found between a higher protein intake (≥80% compared to <80% of estimated protein needs; 0-2 years: 2-3 g/kg; 2-13 years: 1.5-2 g/kg; 13 years: 1.5 g/kg) and the recovery of AKI after adjustment for Paediatric Risk of Mortality score. | Low | 2- |
| Wong et al 2017 106 | To determine whether provision of adequate nutrition is associated with improved clinical outcomes | Retrospective Observational | 107 critically ill children | After adjusting for severity of illness, adequate protein (defined as ≥1.5 g/kg/d of protein) was associated with decreased PICU mortality (adjusted odds ratio [95% confidence interval], 0.09 [0.01–0.94]; p = 0.044). | High | 2+ |
| Bechard et al 2012 77 | To examine the inﬂuence of protein and energy intake on protein balance in children receiving mechanical ventilation. | Systematic review | 9 trials including 347 critically ill children | Positive protein balance was achieved only in those patients with protein intake > 1.5 g/kg/day and energy intake > 57 kcal/kg/day. | High | 2++ |
| Geukers et al 2015 107 | To determine the effect of high protein (5 g/kg/d) dietary intake, compared to normal protein diet (2 g/kg/d) on protein kinetics in infants following cardiac surgery | RCT | 28 critically ill after cardiac surgery | No conclusions on the effect of high protein diet on protein synthesis and balance due to under powering.  Increased oxidation and blood urea nitrogen were observed in the high protein diet, compared to the normal diet. | Low | 1- |
| Mehta et al 2015 108 | To determine the association between protein intake and 60-d mortality in mechanically ventilated children | Prospective Observational | 1245 critically ill children | Higher protein intake (≥1.14g/kg) was associated with improved 60d mortality (OR = 0.14 (95% CI: 0.04, 0.52; P = 0.003) | High | 2+ |
| Jotterand Chaparro et al 2016 75 | To determine how much protein and energy are needed to equilibrate nitrogen and energy balances in ventilated critically ill children | Prospective Observational | 74 critically ill children | Nitrogen balance was achieved with a minimum of 1.5 g/kg/d of protein (95% CI: 1.4 - 1.6) and 58 kcal/kg/d (95%CI: 53 - 63) in critically ill children up to 4 years old | High | 2+ |
| Merhar et al. 2015 109 | To determine the effect of increased enteral protein intake vs standard intake in infants with perinatal brain injury on growth outcomes, safety and tolerability | RCT | 25 critically ill neonates with perinatal brain injury | Infants in the increased enteral protein group (4 g/kg/d) maintained their weight z score from birth to 3 months of age, while infants in the standard group had a significant decrease. The high protein group had higher serum urea nitrogen. | Low | 1- |
| De Betue et al 2013 110 | To investigate the effect of a protein-energy–enriched enteral formulas compared with that of a standard infant formula on arginine kinetics in critically ill infants | RCT | 18 critically ill infants | Higher enteral protein intake (3.1±0.3 g/kg/d) vs standard intake (1.7±0.2 g/kg/d) resulted in an increased arginine appearance whereas citrulline production and plasma arginine concentrations were unaffected. | Moderate | 1- |
| De Betue et al 2011 79 | To investigate the efficacy of a protein-energy–enriched enteral formulas compared with that of a standard infant formula on protein balance | RCT | 18 critically ill infants | Higher enteral protein intake (3.1±0.3) vs standard intake (1.7±0.2) resulted in an increased protein balance (0.73±0.5 vs 0.02±0.6 g/kg/24 h).  It resulted from significantly increased protein synthesis (9.6±4.4 vs 5.2±2.3 g/kg/24 h), despite significantly increased protein breakdown (PE-formula: 8.9±4.3, S-formula: 5.2±2.6 g/kg/24 h). | High | 1- |
| Botran et al 2011 111 | To investigate whether protein- enriched enteral nutrition improved protein metabolism in critically ill children compared with a standard diet, and to evaluate the safety and efficacy of this supplementation | RCT | 41 critically ill children | The nitrogen balance became positive in the protein-enriched diet group (1.5 [1.3-2.1]) on the fifth day of the study, but remained negative in the standard diet group throughout the 5-day study  period (3.1 [2.6-3.4])  No adverse effects of hypoproteinemia were detected | High | 1- |
| van Waardenburg et al 2009 80 | To compare the effect of a protein and energy-enriched infant formula with a standard infant formula nitrogen balances, and plasma amino acid proﬁles | RCT | 18 critically ill infants | In the protein and energy enriched group the nitrogen balances were signiﬁcantly higher (P < 0.05) and essential amino acid plasma levels were higher. | Low | 1- |
| Joosten et al 1999 83 | To determine the value of indirect calorimetry combined with nitrogen balance in order to evaluate the current feeding protocols of mechanically ventilated children | Prospective Observational | 36 critically ill children | The protein intake of patients with a positive N balance (2.2 ± 0.2 g/kg/d) was significantly higher than in patients with a negative N balance (0.9 ± 0.2 g/kg/d) but protein utilization was significantly lower in the first group (1.3 ± 0.1 versus 2.2 ± 0.2). | High | 2- |
| Vanhorebeek et al 2017 112 | Effect of early supplemental parenteral nutrition in the paediatric ICU: a pre-planned observational study of post-randomisation treatments in the PEPaNIC trial | Secondary analysis of RCT | 1440 critically ill children | Early administration of amino acids, but not glucose or lipids, could explain harm caused with increased risk of infections, reduced weaning from the ventilator and live discharge. Risk of harm with amino acids was also shown for low doses; maximal risk of harm was reached with a median daily dose of 1·15 g/kg (IQR 1·10–1·22) for patients weighing up to 10 kg, 0·83 g/kg (0·76–1·03) for patients weighing 10–20 kg, and 0·75 g/kg (0·69–0·79) for patients weighing more than 20 kg | High | 1- |
| Verbruggen et al 2011 113 | To evaluate the effects of insulin infusion and increased parenteral amino acid intakes on whole body protein balance, glucose kinetics, and lipolysis in critically ill, insulin-resistant, septic adolescents | Crossover RCT | 9 critically ill adolescents | High amino acid intake (3.0 g/kg/d), as compared with standard intake (1.5 g/kg/day) improved protein balance (p < .05), but also increased endogenous glucose production and lipolysis rates. Insulin had no additive effect | Moderate | 1- |

| **Question 8. In critically ill children, do different feed formulas (polymeric vs. semi-elemental feed, standard vs. enriched formula) impact on clinical outcomes?** | | | | | | |
| --- | --- | --- | --- | --- | --- | --- |
| **Recommendation 8.1:** Polymeric feeds should be considered as the first choice for enteral nutrition in most critically ill children, unless there are contraindications (Strong consensus) SIGN grade GCP | | | | | | |
| **Recommendation 8.2:** Protein and energy-dense formulations may be considered to support achievement of nutritional requirements in fluid-restricted critically ill children (consensus) SIGN grade B | | | | | | |
| **Recommendation 8.3:** Peptide-based formulations may be considered to improve tolerance and progression of enteral feeding in children for whom polymeric formulations are poorly tolerated or contra-indicated (Strong consensus) SIGN grade GCP | | | | | | |
| **Author and year publication** | **Study examined** | **Study design** | **Patient population** | **Results** | **Application to our question/patient** | **Level of evidence** |
| Vidigal et al 2012 114 | To evaluate the factors associated with the choice of peptide-based formulas in the first enteral nutrition prescription for critically ill children and to compare the direct costs of enteral formulas used in a pediatric intensive care unit. | Prospective Observational | 291 critically ill children | Peptide formula costs were up to 10x higher than standard polymeric feeds.  Physician choice of a peptide feed was associated with malnutrition, fasting > 2 days, and use of alpha-adrenergic drugs. | Moderate | 2- |
| Zhang et al 2018 115 | To determine the impact of high caloric (1kcal/ml) formula HF compared with standard (0.67kcal/ml) formula for 7 days on weight gain and gastrointestinal tolerance in postoperative infants with congenital heart disease | RCT | 64 critically ill infants after cardiac surgery | Infants in the high calorie group less weight loss than those who received standard formula; -16 g [95% confidence interval (CI): -74 to 42] versus -181 g (95% CI: -264 to -99), p = 0.001 | High | 1- |
| Eveleens et al 2018 116 | To evaluate weight achievement and gastrointestinal symptoms in infants admitted to the PICU while receiving protein and energy enriched formula for a prolonged period (≥ 2 weeks) | Retrospective Observational | 70 critically ill infants | In children with a prolonged PICU stay 50 (35-83) and who received PE-formula for 30 (21-54) days an increase in mean WFA Z-score of 0.48 (SD 1.10; p < 0.001) and median (IQR) weight gain of 5.80 (3.28-9.04) g/k/day was observed. The formula was well tolerated. | High | 2- |
| Sahu et al 2016 65 | To evaluate the feasibility and efficacy of enriched breast milk feed on postoperative recovery and growth of infants after open heart surgery | RCT | 49 critically ill children after cardiac surgery | Enriched breast milk was feasible but did not cause a significant difference in mechanical ventilation, length of stay (PICU or hospital), infection rate, or mortality rate | High | 1- |

| **Question 9. In critically ill children, does pharmaconutrition (glutamine, lipids and/or micronutrients) impact on clinical outcomes?** | | | | | | |
| --- | --- | --- | --- | --- | --- | --- |
| **Recommendation 9.1:** There is insufficient evidence to recommend the use of pharmaco-nutrition in critically ill children (Strong consensus) SIGN grade B | | | | | | |
| **Author and year publication** | **Study examined** | **Study design** | **Patient population** | **Results** | **Application to our question/patient** | **Level of evidence** |
| Barbosa E et al 1999 117 | To evaluate the effect of glutamine supplemented enteral formula in critically ill infants | Prospective observational | 9 critically ill children | Early immune-enhancing enteral nutrition decreased IL-6 and increased IL-8 levels, but had no effect on clinical outcome measures (Length of mechanical ventilation, LOS, and infection rate) | Low | 2- |
| Briassoulis G at al 2005 118 | To determine the effect of early immune-enhancing enteral nutrition in children with septic shock | RCT | 38 critically ill children with septic shock | A significant interaction was found between treatment arms and immune status on the time to development of nosocomial infection and sepsis (P < .05) and on the rate of nosocomial infection and sepsis per 100 patient days ( P < .05). | Low | 1- |
| Carcillo J et al 2012 119 | To evaluate whether daily supplementation with zinc, selenium, glutamine, and metoclopramide, compared to whey protein, would reduce the occurrence of nosocomial infection/sepsis in critically ill children (CRISIS trial) | RCT | 293 critically ill children | Compared with whey protein supplementation, zinc, selenium, glutamine, and intravenous metoclopramide conferred no advantage in the immune-competent population | Low | 1- |
| Carcillo J et al 2017 120 | To perform an exploratory post hoc analysis of nutraceutical intervention (CRISIS trial) and the host immune status in relation with the occurrence of nosocomial infection/sepsis in critically ill children | RCT | 240 critically ill children | Providing enteral nutrition with eicosapentaenoic acid + gamma-linolenic acid to critically ill children with lung injury was feasible  No difference in PICU and hospital LOS, or duration of mechanical ventilation | Low | 1- |
| Jacobs B et al 2003 121 | To determine if continuous feeding of enteral nutrition containing eicosapentaenoic acid, gamma-linolenic acid, and antioxidants was feasible in critically ill children with acute lung injury or acute respiratory distress syndrome. | RCT | 26 critically ill children | Early immune-enhancing enteral nutrition decreased IL-6 and increased IL-8 levels, but had no effect on clinical outcome measures (Length of mechanical ventilation, LOS, and infection rate) | Low | 1- |
| Jordan I et al 2016 122 | Randomized clinical trial of glutamine-supplemented versus standard parenteral nutrition in infants with surgical gastrointestinal disease | RCT | 98 critically ill infants | Glutamine supplementation in critically-ill children contributed to maintain high HSP-70 levels for longer. Glutamine supplementation had no influence on IL-10 and failed to show a significant reduction of IL-6 levels  No difference in PICU and hospital LOS | Low | 1- |
| Ong et al 2012 54 | To determine whether glutamine supplementation of parenteral nutrition in infants requiring surgery would reduce the time to full enteral feeding and/or decrease the incidence of sepsis and septicaemia | RCT | 174 critically ill infants | There was no difference in time to full enteral feeding or time to first enteral feeding between groups and supplementing with glutamine had no effect on the overall incidence of sepsis or septicaemia. | High | 1+ |
| McNally et at  2017 123 | To determine the frequency of Vitamin D deficiency in paediatric critical illness and its association with clinical outcomes | Systematic review | 17 studies with 2783 critically ill children | Vitamin D deficiency was associated with increased mortality (OR 1.62, 95% CI 1.11–2.36), illness severity, and need for PICU interventions | High | 2++ |
| Cvijanovich N et al 2016 124 | A Safety and Dose-escalation Study of Intravenous Zinc Supplementation in Paediatric Critical Illness | Prospective observational | 24 critically ill children | IV zinc supplementation at 500 mcg/kg/d restores plasma Zinc levels to near the 50th percentile and is well tolerated | Low | 2- |

| **Question 10: In critically ill children, does continuous feeding compared to intermittent bolus gastric feeding impact on outcomes?** | | | | | | |
| --- | --- | --- | --- | --- | --- | --- |
| **Recommendation 10.1: There is no evidence to suggest that either continuous or intermittent/bolus feeds are superior in delivering gastric feeds in critically ill children (Strong consensus) SIGN recommendation Grade B** | | | | | | |
| **Author and year publication** | **Study examined** | **Study design** | **Patient population** | **Results** | **Application to our question/patient** | **Level of evidence** |
| Horn et al 2003 125 | To compare intermittent bolus 2 hourly to continuous enteral feeding q24h on feed tolerance | RCT | 45 critically ill children | Continuous and intermittent gastric feeding regimens have similar outcomes with respect to the number of stools per day and the prevalence of diarrhoea and vomiting in paediatric intensive care patients BFG started feeds earlier (13 vs 18.5 hours p=0.05) | High | 1- |
| Horn et al 2004126 | To determine the effect of continuous or intermittent on four hourly gastric residual volumes (GRV) | Secondary analysis of RCT | 45 critically ill children | No overall difference in median GRV/kg values and incidence of GRV values greater than 5 ml/kg between treatment groups over the 72-hour study period | High | 1- |
| Fayazi et al 2016 36 | To compare continuous gastric feeding (20ml/hour) with intermittent bolus feeding 50ml q 4 hours on achieving calorie goal and GI complications | RCT | 60 critically ill children | Continuous feeding resulted in less time needed to reach caloric target intake (p<0.05), and no significant difference in vomiting or diarrhoea (p>0.05)  Feed intolerance higher in intermittent group (p=0.02) | Low | 1- |

| **Question 11. In critically ill children, does gastric feeding compared to post-pyloric feeding impact on clinical outcomes?** | | | | | | |
| --- | --- | --- | --- | --- | --- | --- |
| Recommendation 11.1: Gastric feeding is as safe as post pyloric feeding in the majority of critically ill children (consensus) SIGN recommendation Grade C | | | | | | |
| Recommendation 11.2: Gastric feeding is not inferior to post pyloric feeding in the majority of critically ill children (consensus) SIGN recommendation Grade D | | | | | | |
| Recommendation 11.3: Post-pyloric feeding can be considered for critically ill children at high risk of aspiration or requiring frequent fasting for surgery or procedures (consensus) SIGN grade GCP | | | | | | |
| **Author and year publication** | **Study examined** | **Study design** | **Patient population** | **Results** | **Application to our question/patient** | **Level of evidence** |
| Meert et al 2004 127 | Compared continuous gastric feeding to continuous post pyloric feeding on daily energy target achieved | RCT | 74 critically ill children | The daily caloric goal achieved was less in the gastric group compared to the small-bowel group (23% vs 22%, p < 0.01)  No differences in feeding tube displacement, abdominal distension, vomiting or diarrhoea or aspiration of gastric contents | High | 1+ |
| Sonmez Duzkaya 2016 128 | Compared intermittent bolus gastric feeding to continuous post pyloric feeding on VAP | RCT | 40 critically ill children | No statistically significant difference in the incidence of VAP was observed between the ND- and NG-fed patients (p=0.661). | High | 1- |
| Kamat et al 2008 129 | To determine if there was any difference in aspiration between gastric and PP feeding methods in critically ill children | RCT | 44 critically ill children | The time until beginning feedings in the Postpyloric group was greater than that for the nasogastric group (18-24 hrs vs. 6 hrs, p < 0.05)  No difference in aspiration between the 2 groups (p=0.7) | High | 1- |

| **Question 12: In critically ill children does routine Gastric Residual Volume (GRV) to guide enteral feeding impact on outcomes?** | | | | | | |
| --- | --- | --- | --- | --- | --- | --- |
| **Recommendation 12.1:** Routine measurement of GRV in critically ill children is not recommended (Strong consensus) SIGN grade D | | | | | | |
| **Author and year publication** | **Study examined** | **Study design** | **Patient population** | **Results** | **Application to our question/patients** | **Level of evidence** |
| Tume et al 2017 130 | To compare outcomes of energy achievement, VAP and NEC between 2 PICUs one with routine GRV measurement and one without. | Prospective observational | 87 critically ill children | No difference in percentage of energy target achievement by day 4 but no difference in VAP rates either (p=0.7), No NEC in either group. | High | 2- |

| **Question 13: In critically ill children, do prokinetics impact on clinical outcomes?** | | | | | | |
| --- | --- | --- | --- | --- | --- | --- |
| **Recommendation 13.1:** There is insufficient evidence to support the use of prokinetics in critically ill children to improve gastric emptying and feed tolerance (Strong consensus) SIGN grade GCP | | | | | | |
| **Author and year publication** | **Study examined** | **Study design** | **Patient population** | **Results** | **Application to our question/patients** | **Level of evidence** |
| Gharpure et al 2001 131 | To evaluate the effect of erythromycin on the transpyloric passage of feeding tubes in critically ill children, and to evaluate the effect of erythromycin on the distal migration of duodenal feeding tubes. | RCT | 74 critically ill children | Erythromycin does not facilitate transpyloric passage of feeding tubes in critically ill children | Low | 1- |
| Carcillo J et al 2012 119 | To evaluate whether daily supplementation with zinc, selenium, glutamine, and metoclopramide, compared to whey protein, would reduce the occurrence of nosocomial infection/sepsis in critically ill children (CRISIS trial) | RCT | 293 critically ill children | Compared with whey protein supplementation, zinc, selenium, glutamine, and intravenous metoclopramide conferred no advantage in the immune-competent population | Low | 1- |

| **Question 14. In critically ill children, when should Parenteral Nutrition (PN) be started?** | | | | | | |
| --- | --- | --- | --- | --- | --- | --- |
| **Recommendation 14.1:** Withholding parenteral nutrition for up to one week can be considered in critically ill term neonates and children, independent of nutritional status, while providing micronutrients (consensus) SIGN grade B | | | | | | |
| **Author and year publication** | **Study examined** | **Study design** | **Patient population** | **Results** | **Application to our question/patients** | **Level of evidence** |
| Fivez et al 2016 74 | To determine whether withholding PN during the first week in PICU (LPN) is clinically superior to early (supplemental) PN initiation (EPN) | RCT | 1440 critically ill children | Energy intake in the EPN group reached approximately 50 kcal/kg/day on day 2 and 75 kcal/kg/ day on day 5. In the LPN group, energy intake was 20 and 40 kcal/kg/day, respectively. LPN did not affect mortality but decreased the risk of a new infection (10.7% vs 18.5%; Odds ratio 0.48), decreased mean PICU stay from 9.2 days to 6.5 days, decreased the hospital LOS, and decreased the duration of ventilatory support. | High | 1+ |
| Van Puffelen et al 2018 132 | To determine whether withholding PN during the first week in PICU (LPN) is clinically superior to early (supplemental) PN initiation (EPN) in critically ill term neonates | Secondary analysis of RCT | 209 critically ill term neonates | Late PN increased the likelihood of live PICU discharge compared to early PN in both younger neonates (up to 1-week p=0.078) and older neonates (up to 28 days p=0.0021) with no difference in infection rates. The risk of hypoglycaemia was higher in Late PN group (p=0.019) | High | 1+ |
| Van Puffelen et al 2018 133 | To determine whether withholding PN during the first week in PICU (LPN) is clinically superior to early (supplemental) PN initiation (EPN) in critically ill undernourished children | Secondary analysis of RCT | 289 critically ill undernourished children | In undernourished PICU children, late PN reduced the risk of new infections by 11% (p=0.01) and reduced LOS PICU by a median of 2 days with safety outcomes similar for the two groups. | High | 1+ |
| Verstraete et al. 2019 134 | To investigate the long-term impact on physical and neurocognitive development of withholding PN during the first week in PICU (PEPaNIC trial follow-up) | Secondary analysis of RCT | 786 children | Withholding Parenteral nutrition during the first week in PICU did not negatively affect survival, health status, anthropometrics, or neurocognitive development and improved inhibitory control 2 years after PICU admission. | High | 1+ |

| **Question 15. In critically ill children, does the use of a feeding protocols impact on clinical outcomes?** | | | | | | |
| --- | --- | --- | --- | --- | --- | --- |
| **Recommendation 15.1:** Enteral feeding protocols are recommended to improve time to initiation of EN and nutritional intake (Strong consensus) SIGN grade C | | | | | | |
| **Recommendation 15.2:** Enteral feeding protocols are recommended for high-risk populations to improve nutritional intake and reduce adverse events (Strong consensus) SIGN grade D | | | | | | |
| **Author and year publication** | **Study examined** | **Study design** | **Patient population** | **Results** | **Application to our question/patients** | **Level of evidence** |
| Ang et al 2016 32 | To determine the effectiveness of a nurse-led volume-based feeding protocol in PICU patients | Before and after study | 40 critically ill children, 20 pre and 20 post protocol | Median time to feed initiation similar between groups (20 vs 21.5 hours)  No difference in median energy and protein intakes over 7-day period | High | 2- |
| Braudis et al 2009 33 | To test the safety and efficacy of an enteral feeding algorithm in infants following palliation for HLHS | Before and after study | 63 critically ill infants after cardiac surgery  27 pre and 36 post protocol | The median time to achieve recommended daily allowance of calories defined as 108 kcal/kg per day was significantly reduced in the study group (9 vs. 13 days; p 0.01). Despite the rapid advancement of enteral feedings on the algorithm, there was no incidence of NEC in the study group compared with 11% in the control group | High | 2- |
| Carpenito et al 2016 35 | To determine the impact of a feeding protocol on GI morbidity after the Hybrid procedure | Before and after study | 125 critically ill infants after cardiac surgery  73 in pre and 52 post protocol | Pre-FP underwent hybrid procedure later than the post-FP (9.1 ± 5.8 vs. 5.7 ± 3.4 days, respectively, p<0.01) and achieved full enteral feeds earlier than the post-FP (3.2 +/- 2.9 vs. 7.8 +/-3.9 days, respectively, p<0.01). The incidence of necrotizing enterocolitis was higher in the pre- FP versus post-FP [11.0 % (8/65) vs. 5.8 % (3/49), respectively, p = 0.36]. | High | 2- |
| Del Castillo et al 2010 59 | To examine the impact of a feeding protocol on NEC and GI morbidity in HLHS infants | Before and after study | 96 critically ill infants with HLHS  52 in pre and 46 post protocol | Implementation of feeding protocol was associated with delayed initiation of EN (7.5 vs. 5.5 days, p < .001), and delayed achievement of full feeds (7 vs. 4 days, p = .02), but was associated with a lower incidence of NEC. | High | 2- |
| Kyle et al 2016 135 | To examine the energy and protein intake after nutrition support guideline introduction in a PICU | Before and after study | 520 critically ill children  335 in pre and 185 post protocol | Significant improvements seen between day 5-8 in energy intake in children 2 years and older and in protein intake in all age groups. | High | 2+ |
| Brown et al 2012 136 | To determine the impact of a feeding protocol on time to goal feeding rate and calories. | Non-randomised trial | 96 critically ill children | No difference in time to achieve goals between groups | High | 2- |
| Petrillo-Albarano at al 2006 45 | To establish the effect of a feeding protocol with bowel regime on tolerance and time to goal feeding in PICU patients | Before and after study | 91 critically ill children | The protocol group achieved goal nutrition in an average of 18.5 hrs and a median of 14 hrs. The retrospective group achieved goal feedings at an average of 57.8 hrs and a median of 32 hrs (p<.0001). Also noted were a reduction in the percentage of patients vomiting from 20% to 11% and a reduction in constipation from 51% to 33%. | High | 2- |
| Wong et al 2014 137 | To assess the effect of enteral feeding protocols on clinical outcomes in critically ill children | Systematic review | 9 studies included with 1654 children in total | Low level evidence to show that EN protocols are associated with a reduction in GI and infective complications and improved timeliness of feed initiation and time to achieve goal feeding | High | 2++ |
| Yoshimura S et al 2015 47 | To determine the safety and efficacy of feeding protocol in children after cardiac surgery | Before and after study | 109 critically ill children  62 pre and 47 post protocol | Implementation of the protocol was not associated with a different time of initiation EN or total calories provided, but the proportion of energy provided by PN was significantly smaller, and provided by EN was significantly larger after implementation | High | 2- |
| Meyer et al 2009 42 | To assess the impact of nutrition support protocol over 4 time periods before and post implementation 1994-1995(pre), then post 1997-1998, 2001 and 2005 | Before and after study | 353 critically ill children | Over the study period the time taken to initiate EF reduced from 15 hours to 8 hrs, 5.5 and 4.5 hours by 2005.The number of patients on PN reduced from 11% (1997-8) to 4% in 2005. There was an increase in the energy target achievement by day 3 from 6% (1997-8) to 21% (2005) | High | 2- |
| Gentles et al 2014 138 | To evaluate the impact of the introduction of enteral feeding practice guidelines and participation of dietitians in daily ward rounds on enteral nutrition (EN) intake and practices in children in intensive care | Before and after study | 130 critically ill children | Implementation of better EN support practice can improve nutritional intake in some patients in critical care, but had limited benefit for children admitted for corrective heart surgery | High | 2- |
| Geukers et al 2012 139 | To determine the impact of an NST and early aggressive nurse-driven feeding protocol on energy target achievement in 1st 10 days of PICU admission | Before and after study | 171 critically ill children  84 pre and 87 post | Percentage of EN delivered on day 1 of PICU admission increased from 40 to 78% (p=0.01) and 60 to 92% on day 2 (P=0.01) without an increase in GI events. | High | 2- |
| Hamilton S et al 2014 38 | To determine the impact of implementing an algorithm on achieving optimal EN delivery in the PICU | Before and after study | 160 critically ill children  80 pre and 80 post | The implementation of an EN algorithm significantly improved EN delivery and decreased reliance on PN in critically ill children. Energy intake goal was reached earlier in a higher proportion of patients. | High | 2- |
| Kaufman et al  2015 140 | To determine the impact of a MDT nutrition intervention (including a protocol) on improving calorie and protein delivery in cardiac patients and nourishment status at discharge | Before and after study | 160 critically ill children with heart disease  106 pre and 260 post | The implementation of a nutritional team interventions improved nutrition delivery in critically ill children and neonates with heart disease, but no difference was observed in clinical outcome | High | 2- |
| Simsic et al 2016 141 | To determine the impact on clinical variables before and after feeding guideline implementation in newborns after cardiac surgery | Before and after study | 129 critically ill neonates with a heart disease  36 pre and 93 post | No difference in feeding preoperatively (75% vs 69%) or full oral feeding at discharge (78% vs 89%) Mesenteric ischemia no statistically significant difference 6% post and 14% pre, LOS (hospital) reduced post protocol 34 to 27 days (p=0.001) | High | 2- |
| Furlong-Dillard et al 2018 142 | To evaluate the impact of a feeding protocol in neonates before and after complex biventricular cardiac surgery | Before and after study | 121 critically ill neonates with a heart disease  49 pre and 72 post | Infants were fed enterally more preoperatively (86% versus 67%; P = 0.023), reached a fluid goal sooner (63 hours versus 72 hours; P = 0.035), and postoperative duration of TPN usage was significantly shorter in the post intervention period (48 hours versus 62 hours; P = 0.041) with no increase in adverse outcome events or unintended consequences | High | 2- |

Studies highlighted in grey are the ones that could be included in the meta analyses

**References**

1. Wakita M, Fukatsu A, Amagai T. Nutrition assessment as a predictor of clinical outcomes for infants with cardiac surgery: using the prognostic nutritional index. Nutr Clin Pract 2011;26:192-8.

2. Vermilyea S, Slicker J, El-Chammas K, et al. Subjective global nutritional assessment in critically ill children. JPEN J Parenter Enteral Nutr 2013;37:659-66.

3. Valla FV, Ford-Chessel C, Meyer R, et al. A training program for anthropometric measurements by a dedicated nutrition support team improves nutritional status assessment of the critically ill child. Pediatr Crit Care Med 2015;16:e82-8.

4. Irving SY, Seiple S, Nagle M, Falk S, Mascarenhas M, Srinivasan V. Perceived barriers to anthropometric measurements in critically ill children. Am J Crit Care 2015;24:e99-e107.

5. Valla FV, Berthiller J, Gaillard-Le-Roux B, et al. Faltering growth in the critically ill child: prevalence, risk factors, and impaired outcome. Eur J Pediatr 2018;177:345-53.

6. Grippa RB, Silva PS, Barbosa E, Bresolin NL, Mehta NM, Moreno YM. Nutritional status as a predictor of duration of mechanical ventilation in critically ill children. Nutrition 2017;33:91-5.

7. Sotoudeh M, Khalili M, Azizian M, Imani B. PREVALENCE OF MALNUTRITION BASED ON UNDER WEIGHT INPATIENTS IN PEDIATRIC INTENSIVE CARE UNIT. International Journal Of Pharmacy & Technology 2016;8:12333-40.

8. Bechard LJ, Duggan C, Touger-Decker R, et al. Nutritional Status Based on Body Mass Index Is Associated With Morbidity and Mortality in Mechanically Ventilated Critically Ill Children in the PICU. Crit Care Med 2016;44:1530-7.

9. Anton-Martin P, Papacostas M, Lee E, Nakonezny PA, Green ML. Underweight Status Is an Independent Predictor of In-Hospital Mortality in Pediatric Patients on Extracorporeal Membrane Oxygenation. JPEN J Parenter Enteral Nutr 2018;42:104-11.

10. Radman M, Mack R, Barnoya J, et al. The effect of preoperative nutritional status on postoperative outcomes in children undergoing surgery for congenital heart defects in San Francisco (UCSF) and Guatemala City (UNICAR). J Thorac Cardiovasc Surg 2014;147:442-50.

11. Prince NJ, Brown KL, Mebrahtu TF, Parslow RC, Peters MJ. Weight-for-age distribution and case-mix adjusted outcomes of 14,307 paediatric intensive care admissions. Intensive Care Med 2014;40:1132-9.

12. Leite HP, de Lima LF, de Oliveira Iglesias SB, Pacheco JC, de Carvalho WB. Malnutrition may worsen the prognosis of critically ill children with hyperglycemia and hypoglycemia. JPEN J Parenter Enteral Nutr 2013;37:335-41.

13. Zamberlan P, Leone C, Tannuri U, Carvalho WB, Delgado AF. Nutritional risk and anthropometric evaluation in pediatric liver transplantation. Clinics (Sao Paulo) 2012;67:1387-92.

14. de Souza Menezes F, Leite HP, Koch Nogueira PC. Malnutrition as an independent predictor of clinical outcome in critically ill children. Nutrition 2012;28:267-70.

15. Castillo A, Santiago MJ, Lopez-Herce J, et al. Nutritional status and clinical outcome of children on continuous renal replacement therapy: a prospective observational study. BMC Nephrol 2012;13:125.

16. Numa A, McAweeney J, Williams G, Awad J, Ravindranathan H. Extremes of weight centile are associated with increased risk of mortality in pediatric intensive care. Crit Care 2011;15:R106.

17. Botran M, Lopez-Herce J, Mencia S, et al. Relationship between energy expenditure, nutritional status and clinical severity before starting enteral nutrition in critically ill children. Br J Nutr 2011;105:731-7.

18. Srinivasan V, Nadkarni VM, Helfaer MA, Carey SM, Berg RA, American Heart Association National Registry of Cardiopulmonary Resuscitation I. Childhood obesity and survival after in-hospital pediatric cardiopulmonary resuscitation. Pediatrics 2010;125:e481-8.

19. Anderson JB, Beekman RH, 3rd, Border WL, et al. Lower weight-for-age z score adversely affects hospital length of stay after the bidirectional Glenn procedure in 100 infants with a single ventricle. J Thorac Cardiovasc Surg 2009;138:397-404 e1.

20. Eskedal LT, Hagemo PS, Seem E, et al. Impaired weight gain predicts risk of late death after surgery for congenital heart defects. Arch Dis Child 2008;93:495-501.

21. Kelleher DK, Laussen P, Teixeira-Pinto A, Duggan C. Growth and correlates of nutritional status among infants with hypoplastic left heart syndrome (HLHS) after stage 1 Norwood procedure. Nutrition 2006;22:237-44.

22. Hulst JM, van Goudoever JB, Zimmermann LJ, Tibboel D, Joosten KF. The role of initial monitoring of routine biochemical nutritional markers in critically ill children. J Nutr Biochem 2006;17:57-62.

23. Hulst J, Joosten K, Zimmermann L, et al. Malnutrition in critically ill children: from admission to 6 months after discharge. Clin Nutr 2004;23:223-32.

24. Valla FV, Young DK, Rabilloud M, et al. Thigh Ultrasound Monitoring Identifies Decreases in Quadriceps Femoris Thickness as a Frequent Observation in Critically Ill Children. Pediatr Crit Care Med 2017;18:e339-e47.

25. Fivez T, Hendrickx A, Van Herpe T, et al. An Analysis of Reliability and Accuracy of Muscle Thickness Ultrasonography in Critically Ill Children and Adults. JPEN J Parenter Enteral Nutr 2016;40:944-9.

26. Briassoulis G, Zavras N, Hatzis T. Malnutrition, nutritional indices, and early enteral feeding in critically ill children. Nutrition 2001;17:548-57.

27. Davis ET, Xie L, Levenbrown Y. Impact of Obesity on Outcomes in Critically Ill Children. JPEN J Parenter Enteral Nutr 2017:148607117725043.

28. Ross PA, Newth CJ, Leung D, Wetzel RC, Khemani RG. Obesity and Mortality Risk in Critically Ill Children. Pediatrics 2016;137:e20152035.

29. Ward SL, Gildengorin V, Valentine SL, et al. Impact of Weight Extremes on Clinical Outcomes in Pediatric Acute Respiratory Distress Syndrome. Crit Care Med 2016;44:2052-9.

30. Goh VL, Wakeham MK, Brazauskas R, Mikhailov TA, Goday PS. Obesity is not associated with increased mortality and morbidity in critically ill children. JPEN J Parenter Enteral Nutr 2013;37:102-8.

31. Abdul Manaf Z, Kassim N, Hamzaid NH, Razali NH. Delivery of enteral nutrition for critically ill children. Nutr Diet 2013;70:120-5.

32. Ang B, Han WM, Wong JJM, Lee AN, Chan YH, Lee JH. Impact of a nurse-led feeding protocol in a pediatric intensive care unit. Proc Singap Healthc 2016;25:35-42.

33. Braudis NJ, Curley MA, Beaupre K, et al. Enteral feeding algorithm for infants with hypoplastic left heart syndrome poststage I palliation. Pediatr Crit Care Med 2009;10:460-6.

34. Canarie MF, Barry S, Carroll CL, et al. Risk Factors for Delayed Enteral Nutrition in Critically Ill Children. Pediatr Crit Care Med 2015;16:e283-9.

35. Carpenito KR, Prusinski R, Kirchner K, et al. Results of a Feeding Protocol in Patients Undergoing the Hybrid Procedure. Pediatr Cardiol 2016;37:852-9.

36. Fayazi SA, M. Zahraei Fard, S. Farokh Payam, H. Ahmadie Batvandy, Z. Comparing Two Methods of Enteral Nutrition in Terms of their Complications and the Time Needed to Reach Goal Calorie in Children Hospitalized in ICU. Int J Pediatr 2016;4:2119-30.

37. Gurgueira GL, Leite HP, Taddei JA, de Carvalho WB. Outcomes in a pediatric intensive care unit before and after the implementation of a nutrition support team. JPEN J Parenter Enteral Nutr 2005;29:176-85.

38. Hamilton S, McAleer DM, Ariagno K, et al. A stepwise enteral nutrition algorithm for critically ill children helps achieve nutrient delivery goals*. Pediatr Crit Care Med 2014;15:583-9.

39. Lee H, Koh SO, Kim H, Sohn MH, Kim KE, Kim KW. Avoidable causes of delayed enteral nutrition in critically ill children. J Korean Med Sci 2013;28:1055-9.

40. Malakouti A, Sookplung P, Siriussawakul A, et al. Nutrition support and deficiencies in children with severe traumatic brain injury. Pediatr Crit Care Med 2012;13:e18-24.

41. Mara J, Gentles E, Alfheeaid HA, et al. An evaluation of enteral nutrition practices and nutritional provision in children during the entire length of stay in critical care. BMC Pediatr 2014;14:186.

42. Meyer R, Harrison S, Sargent S, Ramnarayan P, Habibi P, Labadarios D. The impact of enteral feeding protocols on nutritional support in critically ill children. J Hum Nutr Diet 2009;22:428-36.

43. Mikhailov TA, Kuhn EM, Manzi J, et al. Early enteral nutrition is associated with lower mortality in critically ill children. JPEN J Parenter Enteral Nutr 2014;38:459-66.

44. Mikhailov TA, Gertz SJ, Kuhn EM, Scanlon MC, Rice TB, Goday PS. Early Enteral Nutrition Is Associated With Significantly Lower Hospital Charges in Critically Ill Children. JPEN J Parenter Enteral Nutr 2018;42:920-5.

45. Petrillo-Albarano T, Pettignano R, Asfaw M, Easley K. Use of a feeding protocol to improve nutritional support through early, aggressive, enteral nutrition in the pediatric intensive care unit. Pediatr Crit Care Med 2006;7:340-4.

46. Tripathi S, Kaur H, Varayil JE, Hurt RT. Effects of enteral nutrition on clinical outcomes among mechanically ventilated and sedated patients in the pediatric intensive care unit. Signa Vitae 2015;10.

47. Yoshimura S, Miyazu M, Yoshizawa S, et al. Efficacy of an enteral feeding protocol for providing nutritional support after paediatric cardiac surgery. Anaesth Intensive Care 2015;43:587-93.

48. Bagci S, Keles E, Girgin F, et al. Early initiated feeding versus early reached target enteral nutrition in critically ill children: An observational study in paediatric intensive care units in Turkey. J Paediatr Child Health 2018;54:480-6.

49. Balakrishnan B, Flynn-O'Brien KT, Simpson PM, Dasgupta M, Hanson SJ. Enteral Nutrition Initiation in Children Admitted to Pediatric Intensive Care Units After Traumatic Brain Injury. Neurocrit Care 2019;30:193-200.

50. Hanekamp MN, Spoel M, Sharman-Koendjbiharie M, et al. Gut hormone profiles in critically ill neonates on extracorporeal membrane oxygenation. J Pediatr Gastroenterol Nutr 2005;40:175-9.

51. Hanekamp MN, Spoel M, Sharman-Koendjbiharie I, Peters JW, Albers MJ, Tibboel D. Routine enteral nutrition in neonates on extracorporeal membrane oxygenation. Pediatr Crit Care Med 2005;6:275-9.

52. Piena M, Albers MJ, Van Haard PM, Gischler S, Tibboel D. Introduction of enteral feeding in neonates on extracorporeal membrane oxygenation after evaluation of intestinal permeability changes. J Pediatr Surg 1998;33:30-4.

53. Wertheim HF, Albers MJ, Piena-Spoel M, Tibboel D. The incidence of septic complications in newborns on extracorporeal membrane oxygenation is not affected by feeding route. J Pediatr Surg 2001;36:1485-9.

54. Ong EG, Eaton S, Wade AM, et al. Randomized clinical trial of glutamine-supplemented versus standard parenteral nutrition in infants with surgical gastrointestinal disease. Br J Surg 2012;99:929-38.

55. Pettignano R, Heard M, Davis R, Labuz M, Hart M. Total enteral nutrition versus total parenteral nutrition during pediatric extracorporeal membrane oxygenation. Crit Care Med 1998;26:358-63.

56. King W, Petrillo T, Pettignano R. Enteral nutrition and cardiovascular medications in the pediatric intensive care unit. JPEN J Parenter Enteral Nutr 2004;28:334-8.

57. López-Herce J, Mencía S, Sánchez C, Santiago MJ, Bustinza A, Vigil D. Postpyloric enteral nutrition in the critically ill child with shock: A prospective observational study. Nutrition Journal 2008;7.

58. Panchal AK, Manzi J, Connolly S, et al. Safety of Enteral Feedings in Critically Ill Children Receiving Vasoactive Agents. JPEN J Parenter Enteral Nutr 2016;40:236-41.

59. del Castillo SL, McCulley ME, Khemani RG, et al. Reducing the incidence of necrotizing enterocolitis in neonates with hypoplastic left heart syndrome with the introduction of an enteral feed protocol. Pediatr Crit Care Med 2010;11:373-7.

60. Iannucci GJ, Oster ME, Mahle WT. Necrotising enterocolitis in infants with congenital heart disease: the role of enteral feeds. Cardiol Young 2013;23:553-9.

61. Jeffries HE, Wells WJ, Starnes VA, Wetzel RC, Moromisato DY. Gastrointestinal morbidity after Norwood palliation for hypoplastic left heart syndrome. Ann Thorac Surg 2006;81:982-7.

62. Luce WA, Schwartz RM, Beauseau W, et al. Necrotizing enterocolitis in neonates undergoing the hybrid approach to complex congenital heart disease. Pediatr Crit Care Med 2011;12:46-51.

63. Manuri L, Morelli S, Agati S, et al. Early hybrid approach and enteral feeding algorithm could reduce the incidence of necrotising enterocolitis in neonates with ductus-dependent systemic circulation. Cardiol Young 2017;27:154-60.

64. Natarajan G, Reddy Anne S, Aggarwal S. Enteral feeding of neonates with congenital heart disease. Neonatology 2010;98:330-6.

65. Sahu MK, Singal A, Menon R, et al. Early enteral nutrition therapy in congenital cardiac repair postoperatively: A randomized, controlled pilot study. Ann Card Anaesth 2016;19:653-61.

66. Sánchez C, López-Herce J, Carrillo A, Bustinza A, Sancho L, Vigil D. Transpyloric enteral feeding in the postoperative of cardiac surgery in children. Journal of Pediatric Surgery 2006;41:1096-102.

67. Typpo KV, Larmonier CB, Deschenes J, Redford D, Kiela PR, Ghishan FK. Clinical characteristics associated with postoperative intestinal epithelial barrier dysfunction in children with congenital heart disease. Pediatr Crit Care Med 2015;16:37-44.

68. Willis L, Thureen P, Kaufman J, Wymore E, Skillman H, da Cruz E. Enteral feeding in prostaglandin-dependent neonates: is it a safe practice? J Pediatr 2008;153:867-9.

69. Lucron H, Chipaux M, Bosser G, et al. [Complications of prostaglandin E1 treatment of congenital heart disease in paediatric medical intensive care]

Complications du traitement par prostaglandines E1 des cardiopathies congenitales en reanimation medicale pediatrique. Arch Mal Coeur Vaiss 2005;98:524-30.

70. Becker KC, Hornik CP, Cotten CM, et al. Necrotizing enterocolitis in infants with ductal-dependent congenital heart disease. Am J Perinatol 2015;32:633-8.

71. Havranek T, Johanboeke P, Madramootoo C, Carver JD. Umbilical artery catheters do not affect intestinal blood flow responses to minimal enteral feedings. J Perinatol 2007;27:375-9.

72. Davey AM, Wagner CL, Cox C, Kendig JW. Feeding premature infants while low umbilical artery catheters are in place: a prospective, randomized trial. J Pediatr 1994;124:795-9.

73. Larsen BMK, Beggs MR, Leong AY, Kang SH, Persad R, Garcia Guerra G. Can energy intake alter clinical and hospital outcomes in PICU? Clin Nutr ESPEN 2018;24:41-6.

74. Fivez T, Kerklaan D, Mesotten D, et al. Early versus Late Parenteral Nutrition in Critically Ill Children. N Engl J Med 2016;374:1111-22.

75. Jotterand Chaparro C, Laure Depeyre J, Longchamp D, Perez MH, Taffe P, Cotting J. How much protein and energy are needed to equilibrate nitrogen and energy balances in ventilated critically ill children? Clin Nutr 2016;35:460-7.

76. Dylewski M, Wibbenmeyer L, Bessey PQ, et al. Nutrition Outcomes. Journal of Burn Care & Research 2013;34:371-5.

77. Bechard LJ, Parrott JS, Mehta NM. Systematic review of the influence of energy and protein intake on protein balance in critically ill children. J Pediatr 2012;161:333-9 e1.

78. Mehta NM, Bechard LJ, Cahill N, et al. Nutritional practices and their relationship to clinical outcomes in critically ill children--an international multicenter cohort study*. Crit Care Med 2012;40:2204-11.

79. de Betue CT, van Waardenburg DA, Deutz NE, et al. Increased protein-energy intake promotes anabolism in critically ill infants with viral bronchiolitis: a double-blind randomised controlled trial. Arch Dis Child 2011;96:817-22.

80. van Waardenburg DA, de Betue CT, Goudoever JB, Zimmermann LJ, Joosten KF. Critically ill infants benefit from early administration of protein and energy-enriched formula: a randomized controlled trial. Clin Nutr 2009;28:249-55.

81. Briassoulis G, Tsorva A, Zavras N, Hatzis T. Influence of an aggressive early enteral nutrition protocol on nitrogen balance in critically ill children. J Nutr Biochem 2002;13:560.

82. Coss-Bu JA, Klish WJ, Walding D, Stein F, Smith EO, Jefferson LS. Energy metabolism, nitrogen balance, and substrate utilization in critically ill children. Am J Clin Nutr 2001;74:664-9.

83. Joosten KF, Verhoeven JJ, Hazelzet JA. Energy expenditure and substrate utilization in mechanically ventilated children. Nutrition 1999;15:444-8.

84. Coss-Bu JA, Jefferson LS, Walding D, David Y, Smith EO, Klish WJ. Resting energy expenditure and nitrogen balance in critically ill pediatric patients on mechanical ventilation. Nutrition 1998;14:649-52.

85. Jotterand Chaparro C, Moullet C, Taffe P, et al. Estimation of Resting Energy Expenditure Using Predictive Equations in Critically Ill Children: Results of a Systematic Review. JPEN J Parenter Enteral Nutr 2018;42:976-86.

86. Mehta NM, Smallwood CD, Joosten KF, Hulst JM, Tasker RC, Duggan CP. Accuracy of a simplified equation for energy expenditure based on bedside volumetric carbon dioxide elimination measurement--a two-center study. Clin Nutr 2015;34:151-5.

87. Mtaweh H, Smith R, Kochanek PM, et al. Energy expenditure in children after severe traumatic brain injury. Pediatr Crit Care Med 2014;15:242-9.

88. Meyer R, Kulinskaya E, Briassoulis G, et al. The challenge of developing a new predictive formula to estimate energy requirements in ventilated critically ill children. Nutr Clin Pract 2012;27:669-76.

89. De Wit B, Meyer R, Desai A, Macrae D, Pathan N. Challenge of predicting resting energy expenditure in children undergoing surgery for congenital heart disease. Pediatr Crit Care Med 2010;11:496-501.

90. Sy J, Gourishankar A, Gordon WE, et al. Bicarbonate kinetics and predicted energy expenditure in critically ill children. Am J Clin Nutr 2008;88:340-7.

91. Framson CM, LeLeiko NS, Dallal GE, Roubenoff R, Snelling LK, Dwyer JT. Energy expenditure in critically ill children. Pediatr Crit Care Med 2007;8:264-7.

92. Lopez-Herce Cid J, Sanchez Sanchez C, Mencia Bartolome S, Santiago Lozano MJ, Carrillo Alvarez A, Bellon Cano JM. [Energy expenditure in critically ill children: correlation with clinical characteristics, caloric intake, and predictive equations]

Consumo calorico en el nino critico: relacion con las caracteristicas clinicas, el aporte calorico y las formulas teoricas de calculo de las necesidades. An Pediatr (Barc) 2007;66:229-39.

93. Havalad S, Quaid MA, Sapiega V. Energy expenditure in children with severe head injury: lack of agreement between measured and estimated energy expenditure. Nutr Clin Pract 2006;21:175-81.

94. van der Kuip M, de Meer K, Oosterveld MJ, Lafeber HN, Gemke RJ. Simple and accurate assessment of energy expenditure in ventilated paediatric intensive care patients. Clin Nutr 2004;23:657-63.

95. Vazquez Martinez JL, Martinez-Romillo PD, Diez Sebastian J, Ruza Tarrio F. Predicted versus measured energy expenditure by continuous, online indirect calorimetry in ventilated, critically ill children during the early postinjury period. Pediatr Crit Care Med 2004;5:19-27.

96. Taylor RM, Cheeseman P, Preedy V, Baker AJ, Grimble G. Can energy expenditure be predicted in critically ill children? Pediatr Crit Care Med 2003;4:176-80.

97. Hardy CM, Dwyer J, Snelling LK, Dallal GE, Adelson JW. Pitfalls in predicting resting energy requirements in critically ill children: a comparison of predictive methods to indirect calorimetry. Nutr Clin Pract 2002;17:182-9.

98. White MS, Shepherd RW, McEniery JA. Energy expenditure in 100 ventilated, critically ill children: improving the accuracy of predictive equations. Crit Care Med 2000;28:2307-12.

99. Briassoulis G, Venkataraman S, Thompson AE. Energy expenditure in critically ill children. Crit Care Med 2000;28:1166-72.

100. Verhoeven JJ, Hazelzet JA, van der Voort E, Joosten KF. Comparison of measured and predicted energy expenditure in mechanically ventilated children. Intensive Care Med 1998;24:464-8.

101. Verbruggen SC, de Betue CT, Schierbeek H, et al. Reducing glucose infusion safely prevents hyperglycemia in post-surgical children. Clin Nutr 2011;30:786-92.

102. de Betue CT, Verbruggen SC, Schierbeek H, et al. Does a reduced glucose intake prevent hyperglycemia in children early after cardiac surgery? a randomized controlled crossover study. Crit Care 2012;16:R176.

103. Larsen BM, Goonewardene, L. A.,Joffe, A. R.,Van Aerde, J. E.,Field, C. J.,Olstad, D. L.,Clandinin, M. T. Pre-treatment with an intravenous lipid emulsion containing fish oil (eicosapentaenoic and docosahexaenoic acid) decreases inflammatory markers after open-heart surgery in infants: a randomized, controlled trial. Clin Nutr 2012;31:322-9.

104. Hauschild DB, Oliveira LDA, Farias MS, et al. Enteral Protein Supplementation in Critically Ill Children: A Randomized Controlled Pilot and Feasibility Study. JPEN J Parenter Enteral Nutr 2019;43:281-9.

105. Kyle UG, Akcan-Arikan A, Silva JC, Goldsworthy M, Shekerdemian LS, Coss-Bu JA. Protein Feeding in Pediatric Acute Kidney Injury Is Not Associated With a Delay in Renal Recovery. J Ren Nutr 2017;27:8-15.

106. Wong JJ, Han WM, Sultana R, Loh TF, Lee JH. Nutrition Delivery Affects Outcomes in Pediatric Acute Respiratory Distress Syndrome. JPEN J Parenter Enteral Nutr 2017;41:1007-13.

107. Geukers VG, Dijsselhof ME, Jansen NJ, et al. The effect of short-term high versus normal protein intake on whole-body protein synthesis and balance in children following cardiac surgery: a randomized double-blind controlled clinical trial. Nutr J 2015;14:72.

108. Mehta NM, Bechard LJ, Zurakowski D, Duggan CP, Heyland DK. Adequate enteral protein intake is inversely associated with 60-d mortality in critically ill children: a multicenter, prospective, cohort study. Am J Clin Nutr 2015;102:199-206.

109. Merhar SL, Meinzen-Derr J, Sprague J, et al. Safety and Tolerability of Enteral Protein Supplementation for Infants With Brain Injury. Nutr Clin Pract 2015;30:546-50.

110. de Betue CT, Joosten KF, Deutz NE, Vreugdenhil AC, van Waardenburg DA. Arginine appearance and nitric oxide synthesis in critically ill infants can be increased with a protein-energy-enriched enteral formula. Am J Clin Nutr 2013;98:907-16.

111. Botran M, Lopez-Herce J, Mencia S, Urbano J, Solana MJ, Garcia A. Enteral nutrition in the critically ill child: comparison of standard and protein-enriched diets. J Pediatr 2011;159:27-32 e1.

112. Vanhorebeek I, Verbruggen S, Casaer MP, et al. Effect of early supplemental parenteral nutrition in the paediatric ICU: a preplanned observational study of post-randomisation treatments in the PEPaNIC trial. Lancet Respir Med 2017;5:475-83.

113. Verbruggen SC, Coss-Bu J, Wu M, et al. Current recommended parenteral protein intakes do not support protein synthesis in critically ill septic, insulin-resistant adolescents with tight glucose control. Crit Care Med 2011;39:2518-25.

114. Vidigal MV, Leite HP, Nogueira PC. Factors associated with peptide-based formula prescription in a pediatric intensive care unit. J Pediatr Gastroenterol Nutr 2012;54:620-3.

115. Zhang H, Gu Y, Mi Y, Jin Y, Fu W, Latour JM. High-energy nutrition in paediatric cardiac critical care patients: a randomized controlled trial. Nurs Crit Care 2018.

116. Eveleens RD, Dungen DK, Verbruggen S, Hulst JM, Joosten KFM. Weight improvement with the use of protein and energy enriched nutritional formula in infants with a prolonged PICU stay. J Hum Nutr Diet 2018.

117. Barbosa E, Moreira EA, Goes JE, Faintuch J. Pilot study with a glutamine-supplemented enteral formula in critically ill infants. Rev Hosp Clin Fac Med Sao Paulo 1999;54:21-4.

118. Briassoulis G, Filippou O, Hatzi E, Papassotiriou I, Hatzis T. Early enteral administration of immunonutrition in critically ill children: results of a blinded randomized controlled clinical trial. Nutrition 2005;21:799-807.

119. Carcillo JA, Dean JM, Holubkov R, et al. The randomized comparative pediatric critical illness stress-induced immune suppression (CRISIS) prevention trial. Pediatr Crit Care Med 2012;13:165-73.

120. Carcillo JA, Dean JM, Holubkov R, et al. Interaction Between 2 Nutraceutical Treatments and Host Immune Status in the Pediatric Critical Illness Stress-Induced Immune Suppression Comparative Effectiveness Trial. JPEN J Parenter Enteral Nutr 2017;41:1325-35.

121. Jacobs BR, Nadkarni V, Goldstein B, et al. Nutritional immunomodulation in critically ill children with acute lung injury: feasibility and impact on circulating biomarkers. Pediatr Crit Care Med 2013;14:e45-56.

122. Jordan I, Balaguer M, Esteban ME, et al. Glutamine effects on heat shock protein 70 and interleukines 6 and 10: Randomized trial of glutamine supplementation versus standard parenteral nutrition in critically ill children. Clin Nutr 2016;35:34-40.

123. McNally JD, Nama N, O'Hearn K, et al. Vitamin D deficiency in critically ill children: a systematic review and meta-analysis. Crit Care 2017;21:287.

124. Cvijanovich NZ, King JC, Flori HR, Gildengorin G, Vinks AA, Wong HR. Safety and Dose Escalation Study of Intravenous Zinc Supplementation in Pediatric Critical Illness. JPEN J Parenter Enteral Nutr 2016;40:860-8.

125. Horn D, Chaboyer W. Gastric feeding in critically ill children: a randomized controlled trial. Am J Crit Care 2003;12:461-8.

126. Horn D, Chaboyer W, Schluter PJ. Gastric residual volumes in critically ill paediatric patients: a comparison of feeding regimens. Aust Crit Care 2004;17:98-100, 2-3.

127. Meert KL, Daphtary KM, Metheny NA. Gastric vs small-bowel feeding in critically ill children receiving mechanical ventilation: a randomized controlled trial. Chest 2004;126:872-8.

128. Sonmez Duzkaya D, Yildiz S. Effect of two different feeding methods on preventing ventilator associated pneumonia in the paediatric intensive care unit (PICU): A randomised controlled study. Aust Crit Care 2016;29:139-45.

129. Kamat P, Favaloro-Sabatier J, Rogers K, Stockwell JA. Use of methylene blue spectrophotometry to detect subclinical aspiration in enterally fed intubated pediatric patients. Pediatr Crit Care Med 2008;9:299-303.

130. Tume LN, Bickerdike A, Latten L, et al. Routine gastric residual volume measurement and energy target achievement in the PICU: a comparison study. Eur J Pediatr 2017;176:1637-44.

131. Gharpure V, Meert KL, Sarnaik AP. Efficacy of erythromycin for postpyloric placement of feeding tubes in critically ill children: a randomized, double-blind, placebo controlled study. JPEN J Parenter Enteral Nutr 2001;25:160-5.

132. van Puffelen E, Vanhorebeek I, Joosten KFM, Wouters PJ, Van den Berghe G, Verbruggen S. Early versus late parenteral nutrition in critically ill, term neonates: a preplanned secondary subgroup analysis of the PEPaNIC multicentre, randomised controlled trial. Lancet Child Adolesc Health 2018;2:505-15.

133. van Puffelen E, Hulst JM, Vanhorebeek I, et al. Outcomes of Delaying Parenteral Nutrition for 1 Week vs Initiation Within 24 Hours Among Undernourished Children in Pediatric Intensive Care: A Subanalysis of the PEPaNIC Randomized Clinical Trial. JAMA Netw Open 2018;1:e182668.

134. Verstraete S, Verbruggen SC, Hordijk JA, et al. Long-term developmental effects of withholding parenteral nutrition for 1 week in the paediatric intensive care unit: a 2-year follow-up of the PEPaNIC international, randomised, controlled trial. Lancet Respir Med 2019;7:141-53.

135. Kyle UG, Lucas LA, Mackey G, et al. Implementation of Nutrition Support Guidelines May Affect Energy and Protein Intake in the Pediatric Intensive Care Unit. J Acad Nutr Diet 2016;116:844-51 e4.

136. Brown A-M, Forbes ML, Vitale VS, Tirodker UH, Zeller R. Effects of a Gastric Feeding Protocol on Efficiency of Enteral Nutrition in Critically Ill Infants and Children. ICAN: Infant, Child, & Adolescent Nutrition 2012;4:175-80.

137. Wong JJ, Ong C, Han WM, Lee JH. Protocol-driven enteral nutrition in critically ill children: a systematic review. JPEN J Parenter Enteral Nutr 2014;38:29-39.

138. Gentles E, Mara J, Diamantidi K, et al. Delivery of enteral nutrition after the introduction of practice guidelines and participation of dietitians in pediatric critical care clinical teams. J Acad Nutr Diet 2014;114:1974-80 e3.

139. Geukers V, Neef M, Dijsselhof M, Sauerwein H, Bos A. Effect of a nurse-driven feeding algorithm and the institution of a nutritional support team on energy and macronutrient intake in critically ill children2012.

140. Kaufman J, Vichayavilas P, Rannie M, et al. Improved nutrition delivery and nutrition status in critically ill children with heart disease. Pediatrics 2015;135:e717-25.

141. Simsic JM, Carpenito KR, Kirchner K, et al. Reducing variation in feeding newborns with congenital heart disease. Congenit Heart Dis 2017;12:275-81.

142. Furlong-Dillard J, Neary A, Marietta J, et al. Evaluating the Impact of a Feeding Protocol in Neonates before and after Biventricular Cardiac Surgery. Pediatric quality & safety 2018;3:e080.
