# Supplementary figures and images for: Nutritional support for children during critical illness: European Society of Pediatric and Neonatal Intensive Care (ESPNIC) metabolism, endocrine and nutrition section position statement and clinical recommendations
Source: Springer Nature journal article supplement (doi:10.1007/s00134-019-05922-5), 2020-02-20

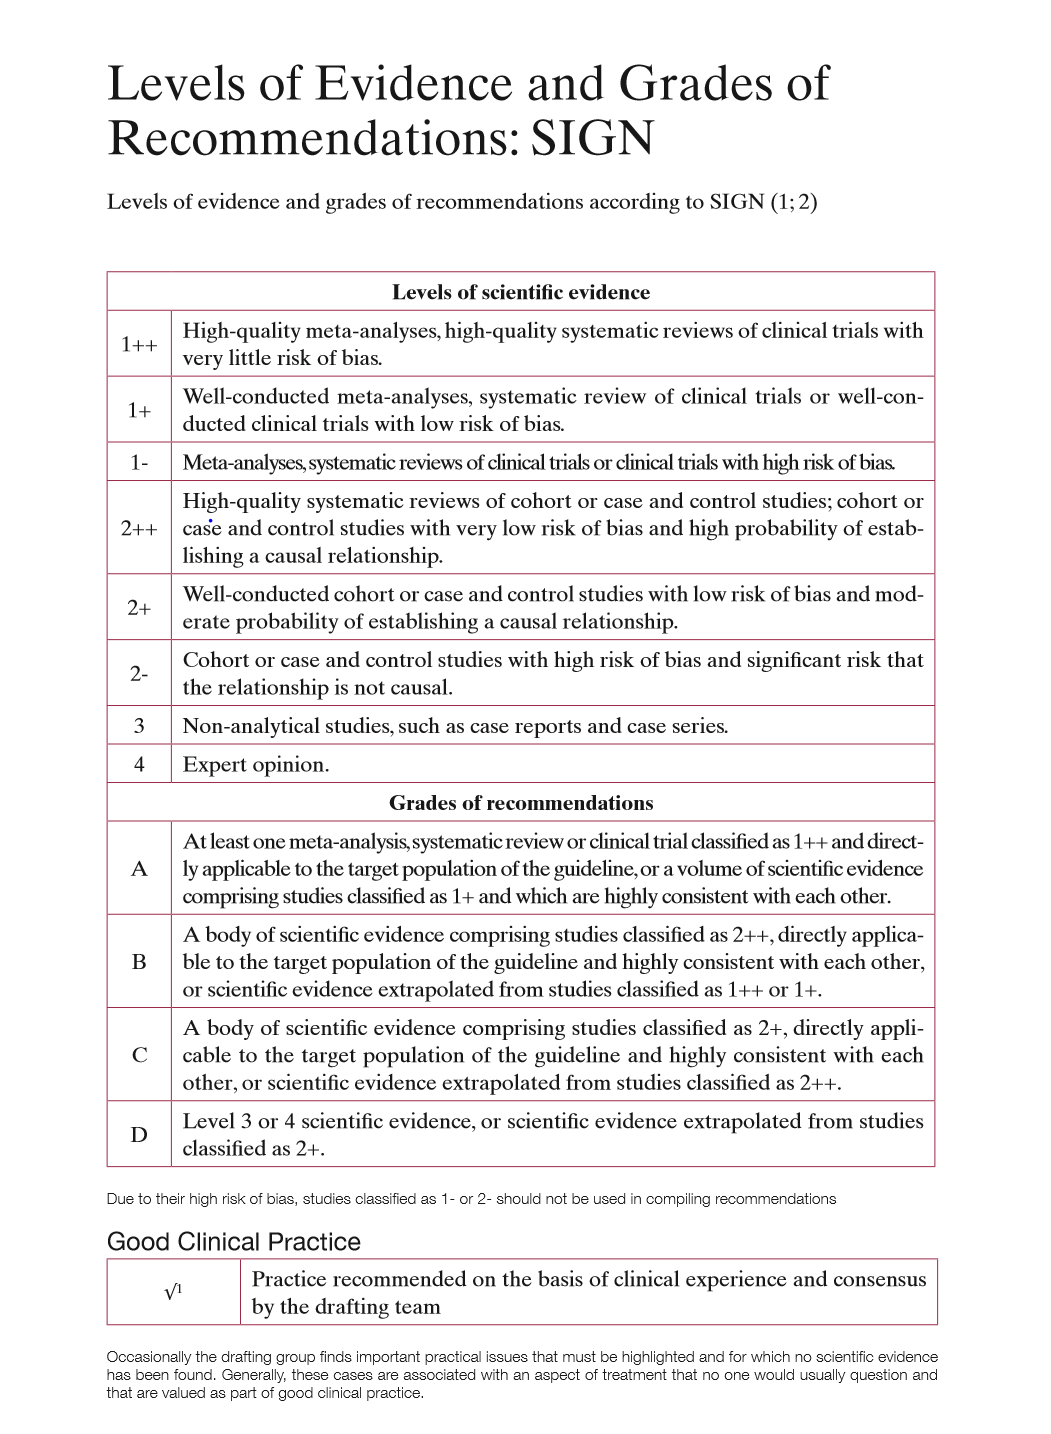


**Supplementary File 3: SIGN Grading**

Supplement: MOESM3 [file 17728412]
